# Supplementary material
Source: PubMed Central journal article supplement (PMC5222586)
Supplement: NIHMS812289-supplement-ACS_CATAL_2016_SI.pdf [file NIHMS812289-supplement-ACS_CATAL_2016_SI.pdf]

## SUPPORTING INFORMATION

### Selective Cobalt-Catalyzed Reduction of Terminal Alkenes and Alkynes Using (EtO)<sub>2</sub>Si(Me)H as a Stoichiometric Reductant

Balaram Raya, Souvagya Biswas and T. V. RajanBabu\*  
Department of Chemistry and Biochemistry, 100 W. 18<sup>th</sup> Avenue, The Ohio State University,  
Columbus, Ohio 43210 USA

### TABLE OF CONTENTS

|                                                                                                                                         |     |
|-----------------------------------------------------------------------------------------------------------------------------------------|-----|
| General Experimental                                                                                                                    | S2  |
| Ligand Preparation                                                                                                                      | S2  |
| Synthesis of Cobalt Complexes                                                                                                           | S3  |
| General Procedure for Cobalt-Catalyzed Reductions                                                                                       | S3  |
| Procedure for reduction reaction under low catalyst loading (neat substrate).                                                           | S4  |
| Cobalt-catalyzed reduction of dodecadiene at 50 psi H <sub>2</sub> (Eq 4)                                                               | S5  |
| Reduction of dodeca-1,3-diene at 1 atm of hydrogen using a H <sub>2</sub> -filled balloon (Eq 4)                                        | S5  |
| Cobalt-catalyzed reduction of the silyl enol ether (32) under 50 psi H <sub>2</sub> (Scheme 2)                                          | S5  |
| Hydrogenation of 32 using Wilkinson's reagent and hydrogen. (19 from 32)                                                                | S6  |
| Cobalt-catalyzed reduction of alkyne <b>36a-d</b> to alkene with 1 equivalents of (EtO) <sub>2</sub> SiMeH to produce 37a-d (Scheme 3). | S6  |
| Cobalt-catalyzed reduction of alkyne <b>36a</b> to alkane <b>38a</b> with 2 equivalents of (EtO) <sub>2</sub> SiMeH (Scheme 4).         | S7  |
| Procedure for the attempted reduction in the presence of triethyl borane (Et <sub>3</sub> B) and ( <i>i</i> -PrPDI)Co(I)Cl.             | S7  |
| Attempted reduction of alkene using <i>i</i> PrPDI-Co(I)Cl                                                                              | S7  |
| Procedure for deuterium reactions in toluene-d <sub>8</sub> and THF-D <sub>8</sub>                                                      | S8  |
| Cobalt-catalyzed reduction of 3-phenoxy styrene in the presence of D <sub>2</sub> O                                                     | S8  |
| Reduction of 3-phenoxy styrene in the presence of 4 Å molecular sieves                                                                  | S9  |
| Reduction of 4-phenyl-1-butene using various equivalents of silanes (Eq 5)                                                              | S9  |
| <sup>1</sup> H and <sup>13</sup> C NMR, GC Retention Times of Reduction Products                                                        | S11 |
| References                                                                                                                              | S20 |

**General experimental.** All air- and moisture sensitive manipulations were carried out using standard vacuum line and Schlenk techniques, or in a drybox containing a purified nitrogen or argon. Solvents were distilled from the appropriate drying agents under nitrogen. All glassware was cleaned using base (KOH, *i*PrOH) then acid (HCl(aq)) baths. Analytical TLC was performed on E. Merck pre-coated (0.25 mm) silica gel 60 F254 plates. Flash column chromatography was carried out on silica gel 40 (Sorbtech Chemicals), Gas chromatographic analysis was conducted on an Agilent 7820A using hydrogen as the carrier gas, equipped with a methyl silicone column (30 m X 0.32 mm, 0.25  $\mu$ m film thickness). Cobalt (II) chloride and phosphine ligands were purchased from Strem Chemicals Inc. All dienes used were synthesized in the laboratory. All silanes were purchased from Sigma Aldrich, Oakwood, Alfa Aesar and Apollo Scientific. All activating reagents were purchased from Sigma Aldrich.  $^1\text{H}$ ,  $^{13}\text{C}$  NMR spectra were recorded on Bruker 400 and 600MHz, spectrometers. All spectra were obtained at ambient temperature. The chemical shifts ( $\delta$ ) were recorded in parts per million (ppm) and the coupling constants ( $J$ ) in Hertz (Hz).  $^1\text{H}$  and  $^{13}\text{C}$  NMR multiplicity and coupling constants are reported where applicable.  $^1\text{H}$  and  $^{13}\text{C}$  spectra were referenced to the residual deuterated solvent peak ( $\text{CHCl}_3$  7.26 ppm, 77.32 ppm).

**Ligand preparation.** Bis1,6-(diaryliminoyl)pyridine ligands **5a-5d**, were prepared by a Schiff's base reaction using a modified literature methodology.<sup>1</sup> 2,6-Diacylpyridine (5.00 g, 30.64 mmol) and *p*-toluenesulfonic acid (0.59 g, 3.07 mmol) were added to the 250 mL round bottom flask with a magnetic stirrer bar and toluene (150 mL) was added via syringe. Amine (9.11 g, 67.41 mmol) was added to the reaction mixture via syringe. The reaction mixture was stirred at reflux (120  $^\circ\text{C}$ ) for 72 h under argon and water that formed was removed with a Dean-Stark trap. After 72 h reflux, the mixture was cooled to room temperature and the brown reaction mixture was washed with a solution of  $\text{Na}_2\text{CO}_3$  and twice with water. The organic layer was separated and the combined aqueous layers were washed twice with diethyl ether. All organic layers were combined and dried with  $\text{MgSO}_4$  and rotary evaporation of the resulting solution yielded a brown residue. The brown residue was crystallized from hot ethanol and was stored at -25  $^\circ\text{C}$  for overnight. The solid was isolated by vacuum filtration and washed several times with cold ethanol. The crystals were dried on vacuum pump for overnight.  $^1\text{H}$  and  $^{13}\text{C}$  NMR of ligands

matched what are the reported literature. Ligand **5e** was prepared according to reported literature.<sup>2</sup>

**Synthesis of cobalt complexes:** Modified literature methods were used for the preparation of complexes (*i*Pr-PDI)CoCl<sub>2</sub>, (Et-PDI)CoCl<sub>2</sub>, (Me-PDI)CoCl<sub>2</sub>, (Cy-PDI)CoCl<sub>2</sub>. Anhydrous CoCl<sub>2</sub> (48.5 mg, 0.37 mmol) and PDI ligand were taken in a flame dried 100 mL Schlenk flask and magnetic stir-bar was loaded inside the glove box with argon. The flask was removed from the glove box and purged with dry argon. Freshly distilled, degassed THF (13 mL) was added, and upon stirring at room temperature for 10 min, a brown solution was formed. The mixture was then stirred under argon for 72 h. After 72 h stirring at room temperature, freshly distilled diethyl ether (15 mL) and pentane (15 mL) were added via syringe. The solid was filtered in air and washed with cold pentane for several times. The brown solid complex was dried in pump for overnight and was used as is.

The bis-phosphine Co(II)-complexes were prepared as described earlier.<sup>3</sup> Anhydrous CoCl<sub>2</sub> (50.5 mg, 0.390 mmol) was added to a previously flame-dried 50-mL round two-necked bottom flask fitted with a flow control gas inlet and magnetic stir-bar loaded in a glove box under nitrogen. The nitrogen atmosphere was removed and the flask purged with dry argon. Freshly distilled, degassed THF (5 mL) was added, and upon stirring at room temperature for 15 min, a clear deep blue solution formed. A solution of diphenylphosphinopropane (DPPP, 181 mg, 0.410 mmol) in freshly distilled, degassed ether (5 mL) was added drop wise to yield a blue turbid solution. After stirring at room temperature for 15 h, 20 mL freshly distilled, degassed hexane was added in one portion to yield a blue precipitate. The resulting precipitate was filtered on a sintered glass frit under argon atmosphere, and washed with diethyl ether and hexane (1:1) mixture (3 X 5 mL) to remove any unreacted DPPP, resulting in quantitative yield of a light blue solid, which was used with no further purification.

**General procedure for cobalt-catalyzed reductions.** An alkene (0.3 mmol) was added to a solution of cobalt (II) chloride PDI complex (9.2 mg, 0.015 mmol, 0.05 equivalents) in anhydrous freshly distilled toluene (0.16 M) at room temperature under an atmosphere of argon. The flask was cooled at -78 °C (outside bath temperature), sodium triethylborohydride (0.03 mmol, 0.1 equivalents) in toluene was added, followed by a silane (0.33 mmol, 1.1 equivalents) and the reaction mixture was stirred at room temperature for 5 h. After completion the reaction,

it was filtered through the pad of silica by adding hexane and was concentrated under vacuum. Isolated yields were determined after purification by silica chromatography using hexane as eluent and removal of the solvent.

**Procedure for reduction reaction under low catalyst loading (neat substrate).** *Reduction of 4-phenyl-1-butene (with 0.1 mol% catalyst).* The alkene (4-phenyl-1-butene, 0.5 g, 3.79 mmol) was added to a solution of PDI-cobalt(II) chloride complex (2.3 mg, 0.003 mmol, 0.001 equivalents) at room temperature under an atmosphere of argon. The flask was cooled at -78 °C, sodium triethylborohydride (0.007 mmol, 0.002 equivalents, 1 M in toluene) was added, followed by a silane (4.17 mmol, 1.1 equivalents, 0.56 mL). The flask was removed from the cold bath and placed in a oil bath preheated to 40 °C (~ in 2-3 min). The reaction mixture was stirred at 40 °C for 1 h. After completion (GC) of the reaction, it was filtered through the pad of silica by adding hexane and was concentrated under vacuum. Isolated yield (93%) was determined after purification by silica chromatography using hexane as eluent. The product was 98% by GC with the remaining <2% identified (GC-MS) as the isomerized 4-phenyl-2-butene, originally present in the starting material.

A parallel reaction done exactly as the previous one was evaporated to dryness and the white residue (~ 129 mg) was identified as higher molecular weight (up to MW 544) compounds by MALDI.

*Reduction of 4-tert-butyl-1-vinylcyclohexene (0.1 mol% catalyst).* The alkene (0.5 g, 3.05 mmol) was added to a solution of PDI-cobalt (II) chloride complex (2.0 mg, 0.003 mmol, 0.001 equivalents) at room temperature under an atmosphere of argon. The flask was cooled at -78 °C, sodium triethylborohydride (0.006 mmol, 0.002 equivalents, 1 M in toluene) was added, followed by a

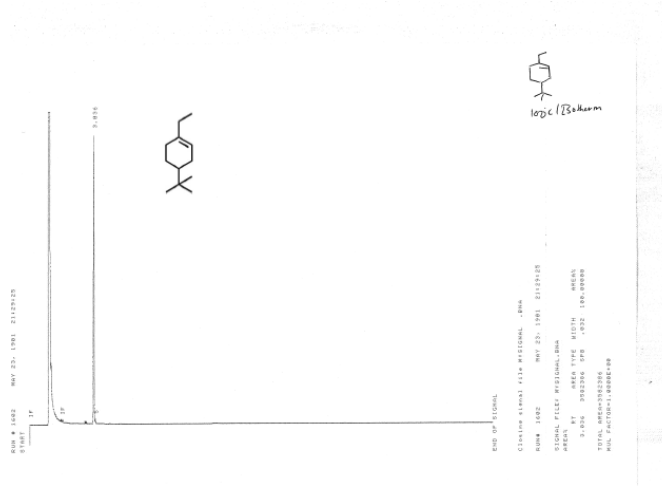

(EtO)<sub>2</sub>MeSiH (3.35 mmol, 0.45 mL, 1.1 equivalents). The flask was removed from the cold bath and placed in an oil bath preheated to 40 °C (~ in 2-3 min). The reaction mixture was stirred at 40 °C for 1 h. After completion the reaction (GC), it was filtered through the pad of silica by adding hexane and was concentrated under vacuum. Isolated yield (96%) was determined after purification by silica chromatography using hexane as eluent.

**Cobalt-catalyzed reduction of dodecadiene at 50 psi H<sub>2</sub> (Eq 4).** The diene (1.21 mmol) was added to a solution of cobalt (II) chloride PDI complex (36.8 mg, 0.06 mmol, 0.05 equivalents) in anhydrous toluene (0.16 M) at -78 °C under an atmosphere of argon. Sodium triethylborohydride (0.12 mmol, 0.1 equivalents) was added to the reaction mixture. The reaction mixture was then transferred to the 20 mL white cap vial equipped with magnetic stir bar and the vial was placed inside a Fisher-Porter tube. The tube was sealed, evacuated and purged three times with hydrogen gas and then filled to 50 psi. A glass shield was placed in front of the tube and mixture was stirred for 5 h (monitor by GC, opening of the tube should be done very carefully releasing the pressure and the tube was sealed, evacuated and purged every single time). After 5 h, the solution was filtered through a short pad of silica with pentane to get the hydrogenated products(s) identified by NMR and GC MS.

**Reduction of dodeca-1,3-diene at 1 atm of hydrogen using a H<sub>2</sub>-filled balloon (Eq 4).** A 50 mL Schlenk flask equipped with magnetic stirring bar was flame dried and purged with argon. The flask was charged with Cobalt (II) chloride PDI complex (36.8 mg, 0.06 mmol, 0.05 equivalents). Anhydrous toluene (0.16 M) was added via syringe and the flask was cooled at -78 °C under an atmosphere of argon. Diene (1.21 mmol) followed by sodium triethylborohydride (0.12 mmol, 0.1 equivalents) was added to a solution at -78 °C. The flow control valve was closed to argon and hydrogen balloon was placed through the rubber septum. The flask was then removed from the bath and allowed to stirrer at room temperature for 5 h. The progress of reaction was monitored by GC. After 5 h, the solution was filtered through a short pad of silica with pentane to get the hydrogenated product.

**Cobalt-catalyzed reduction of the silyl enol ether (32) under 50 psi H<sub>2</sub> (Scheme 2).** The diene (0.08 mmol) was added to a solution of cobalt (II) chloride PDI complex (2.8 mg, 0.05

mmol, 0.05 equivalents) in anhydrous toluene (0.16 M) at  $-78\text{ }^{\circ}\text{C}$  under an atmosphere of argon. Sodium triethylborohydride (0.09 mmol, 0.1 equivalents) was added to the reaction mixture. The reaction mixture was then transferred to the 20 mL white cap vial equipped with magnetic stir bar through cannula transfer and the vial was placed inside a Fisher-Porter tube. The tube was sealed, evacuated and purged three times with hydrogen gas and then filled to 50 psi. A glass shield was placed in front of the tube and mixture was stirred for 5 h (monitor by GC, opening of the tube should be done very carefully releasing the pressure and the tube was sealed, evacuated and purged every single time). After 5 h, the solution was filtered through a short pad of silica with pentane to get the hydrogenated product, which was analyzed by GC and NMR.

**Hydrogenation of 32 using Wilkinson's reagent and hydrogen. 4-Ethyl-2-octanone (19 from 32):** To

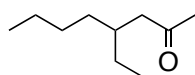

a Fisher-Porter tube equipped with a magnetic stir bar was added 0.068 g (0.300 mmol) **23** and 0.0424 g (0.0458 mmol) Wilkinson's catalyst in 5 mL DCM. The tube was sealed, evacuated and purged three times with hydrogen gas, and then pressurized to 35 psi of hydrogen gas. The solution stirred at room temperature for 24 h. The gas was evacuated, the solution filtered through a short plug of silica gel to remove the catalyst and the solvent removed. The crude product was purified using 5% diethyl ether / 95% pentanes to get the product as a clear oil 0.044 g (94% yield).

$^1\text{H}$  NMR (400 MHz,  $\text{CDCl}_3$ )  $\delta$  2.32 (d, 2H,  $J = 6.8$  Hz), 2.11 (s, 3H), 1.80 (quintet, 1H,  $J = 6.4$  Hz), 1.20-1.32 (m, 8H), 0.81-0.89 (two triplets superimposed, 3H each).

$^{13}\text{C}$  NMR (100 MHz,  $\text{CHCl}_3$ )  $\delta$  209.4, 48.4, 35.3, 33.1, 30.3, 29.7, 28.8, 26.3, 22.9, 14.0, 10.8.

GC-MS (*methyl silicone*):  $m/z$  156.30 ( $[\text{M}^+]$ ). exact mass calculated for  $\text{C}_{10}\text{H}_{20}\text{O}$  156.27.

$[\alpha]_{\text{D}}^{23}$  ( $c = 0.264$ ,  $\text{CHCl}_3$ ) + 0.80 [from (*S,S*-BDPP)].

**Cobalt-catalyzed reduction of alkyne 36a-d to alkene with 1 equivalents of  $(\text{EtO})_2\text{SiMeH}$  to produce 37a-d (Scheme 3).** A 50 mL Schlenk flask equipped with magnetic stirring bar was flame dried and purged with argon. The flask was charged with cobalt (II) chloride PDI complex (16.6 mg, 0.03 mmol, 0.01 equivalents). The flask was cooled at  $-78\text{ }^{\circ}\text{C}$  under an atmosphere of argon. Alkyne (3.63 mmol) was added to the solution. Sodium triethylborohydride (0.07 mmol, 0.02 equivalents) and silane (3.99 mmol, 1.1 equivalents) was added to a solution at  $-78\text{ }^{\circ}\text{C}$ . The reaction mixture was transferred to the pre heated oil bath ( $40\text{ }^{\circ}\text{C}$ ). The reaction mixture was stirred at  $40\text{ }^{\circ}\text{C}$  for 1h. The progress of reaction was monitored by

GC and GC-MS. The solution was then filtered through the pad of silica by adding hexane and was concentrated under vacuum. Isolated yield was determined after purification by silica chromatography using hexane as eluent. With 2 equivalents of silane the alkanes **38a-d** are produced in quantitative yield.

**Cobalt-catalyzed reduction of alkyne 36a to alkane 38a with 2 equivalents of (EtO)<sub>2</sub>SiMeH (Scheme 4).** A 50 mL Schlenk flask equipped with magnetic stirring bar was flame dried and purged with argon. The flask was charged with cobalt (II) chloride PDI complex (16.6 mg, 0.03 mmol, 0.01 equivalents). The flask was cooled at -78 °C under an atmosphere of argon. Alkyne (3.63 mmol) was added to the solution. Sodium triethylborohydride (0.07 mmol, 0.02 equivalents) and silane (3.99 mmol, 1.1 equivalents) was added to a solution at -78 °C. The reaction mixture was transferred to the pre-heated oil bath (40 °C). The reaction mixture was stirred at 40 °C for 1 h. The progress of reaction was monitored by GC and GC-MS, revealing only the alkene. After 1 h, additional silane (3.99 mmol, 1.1 equivalents) was added via syringe and the reaction mixture was further stirred at 40 °C for 90 minutes. The solution was then filtered through the pad of silica by adding hexane and was concentrated under vacuum. Isolated yield was determined after purification by silica chromatography using hexane as eluent.

**Procedure for the attempted reduction in the presence of triethyl borane (Et<sub>3</sub>B) and (<sup>i</sup>PrPDI)Co(I)Cl.** 3-Phenoxystyrene (0.26 mmol) was added to a solution of PDI-cobalt(I) chloride<sup>4</sup> complex (7.8 mg, 0.01 mmol, 0.05 equivalents) in anhydrous toluene (0.16 M) at room temperature under an atmosphere of argon. The flask was cooled at -78 °C, triethylborane (0.02 mmol, 0.1 equivalents, 1 M hexane) was added, followed by a (EtO)<sub>2</sub>MeSiH (0.30 mmol, 1.1 equivalents) and the reaction mixture was stirred at room temperature for 4 h. At the end of 12 h, it was filtered through the pad of silica by adding hexane and was concentrated under vacuum. No product was detected by GC.

**Attempted reduction of alkene using <sup>i</sup>PrPDI-Co(I)Cl.** 3-Phenoxystyrene (0.26 mmol) was added to a solution of PDI-cobalt(I) chloride complex (prepared by reduction of the Co(II) complex with Zn, 7.8 mg, 0.01 mmol, 0.05 equivalents)<sup>4</sup> in anhydrous toluene (0.16 M) at room temperature under an atmosphere of argon. The flask was cooled at -78 °C, sodium

triethylborohydride (0.01 mmol, 0.05 equivalents) was added, followed by a (EtO)<sub>2</sub>MeSiH (0.30 mmol, 1.1 equivalents) and the reaction mixture was stirred at room temperature for 4 h. After completion the reaction, it was filtered through the pad of silica by adding hexane and was concentrated under vacuum. Isolated yield (96%) was determined after purification by silica chromatography using hexane as eluent. Purity was ascertained by GC and <sup>1</sup>H NMR.

**Procedure for deuterium labeling studies.** An alkene (0.26 mmol) was added to a solution of cobalt (II) chloride PDI complex (7.8 mg, 0.01 mmol, 0.05 equivalents) in anhydrous deuterated toluene (0.16 M) at room temperature under an atmosphere of argon. The flask was cooled at -78 °C, sodium triethylborohydride (0.03 mmol, 0.1 equivalents, 1 M solution in toluene) was added, followed by (EtO)<sub>2</sub>MeSiH (0.30 mmol, 1.1 equivalents) and the reaction mixture was stirred at room temperature for 5 h. After completion the reaction, it was filtered through the pad of silica by adding hexane and was concentrated under vacuum. Isolated yield (97%) was determined after purification by silica chromatography using hexane as eluent. There was no D-incorporation as judged by NMR and mass spectrometry.

A similar experiment was conducted in THF-d<sub>8</sub>. The converted product (~ 34%) was isolated and analyzed by GC and GCMS and showed similar results.

**Cobalt-catalyzed reduction of 3-phenoxy styrene in the presence of D<sub>2</sub>O.** A 50 mL Schlenk flask equipped with magnetic stirring bar was flame dried and purged with argon. The flask was charged with cobalt (II) chloride PDI complex (3.2 mg, 0.005 mmol, 0.01 equivalents). The flask was cooled at -78 °C under an atmosphere of argon. Alkene (0.51 mmol) was added to the solution. Sodium triethylborohydride (0.01 mmol, 0.02 equivalents) and silane (0.56 mmol, 1.1 equivalents) was added to a solution at -78 °C. D<sub>2</sub>O (0.51 mmol, 1 equivalents) was finally added and the reaction mixture was transferred to the pre-heated oil bath (40 °C). The reaction mixture was stirred at 40 °C for 1 h. After 1 h, it was filtered through the pad of silica by adding hexane and was concentrated under vacuum. Isolated yield (98%) was determined after purification by silica chromatography using hexane as eluent. There was no D-incorporation as judged by NMR and mass spectrometry.



**Reduction of 3-phenoxy styrene in the presence of 4 Å molecular sieves.** A 50 mL Schlenk flask equipped with magnetic stirring bar was flame dried and purged with argon. The flask was charged with cobalt (II) chloride PDI complex (3.2 mg, 0.005 mmol, 0.01 equivalents) and 4 Å MS. The flask was cooled at -78 °C under an atmosphere of argon. Alkene (0.51 mmol) was added to the solution. Sodium triethylborohydride (0.01 mmol, 0.02 equivalents) and silane (0.56 mmol, 1.1 equivalents) was added to a solution at -78 °C. The reaction mixture was transferred to the pre heated oil bath (40 °C). The reaction mixture was stirred at 40 °C for 1h. After 1 h, it was filtered through the pad of silica by adding hexane and was concentrated under vacuum. Isolated yield (97%) was determined after purification by silica chromatography using hexane as eluent.

**Reduction of 4-phenyl-1-butene using various equivalents of silanes (Eq 5).** Six 50 mL Schlenk flask equipped with magnetic stirring bar were flame dried and purged with argon. Each flask was charged with cobalt (II) chloride PDI complex (9.3 mg, 0.01 mmol, 0.01 equivalents). The flask was cooled at -78 °C under an atmosphere of argon. Alkene (1.51 mmol) was added to the each solution. Sodium triethylborohydride (0.03 mmol, 0.02 equivalents) and the silane (0.15 mmol for 10 mol%, 0.30 mmol for 20 mol%, 0.60 mmol for 40 mol%, 0.90 mmol for 60 mol%, 1.20 mmol for 80 mol% and 1.66 mmol for 0.11 equivalents) was added to each solution at -78 °C. The reaction mixtures were transferred to the pre heated oil bath (40 °C). The reaction mixtures were stirred at 40 °C for 1h. The progress of reaction was monitored by GC and GC-MS. The reaction were quenched and the product mixture in each case was then filtered through the pad of silica by adding hexane and was concentrated under vacuum. Isolated yield was determined after purification by silica chromatography using hexane as eluent. The product(s) was analyzed by GC (see the attached chromatograms).

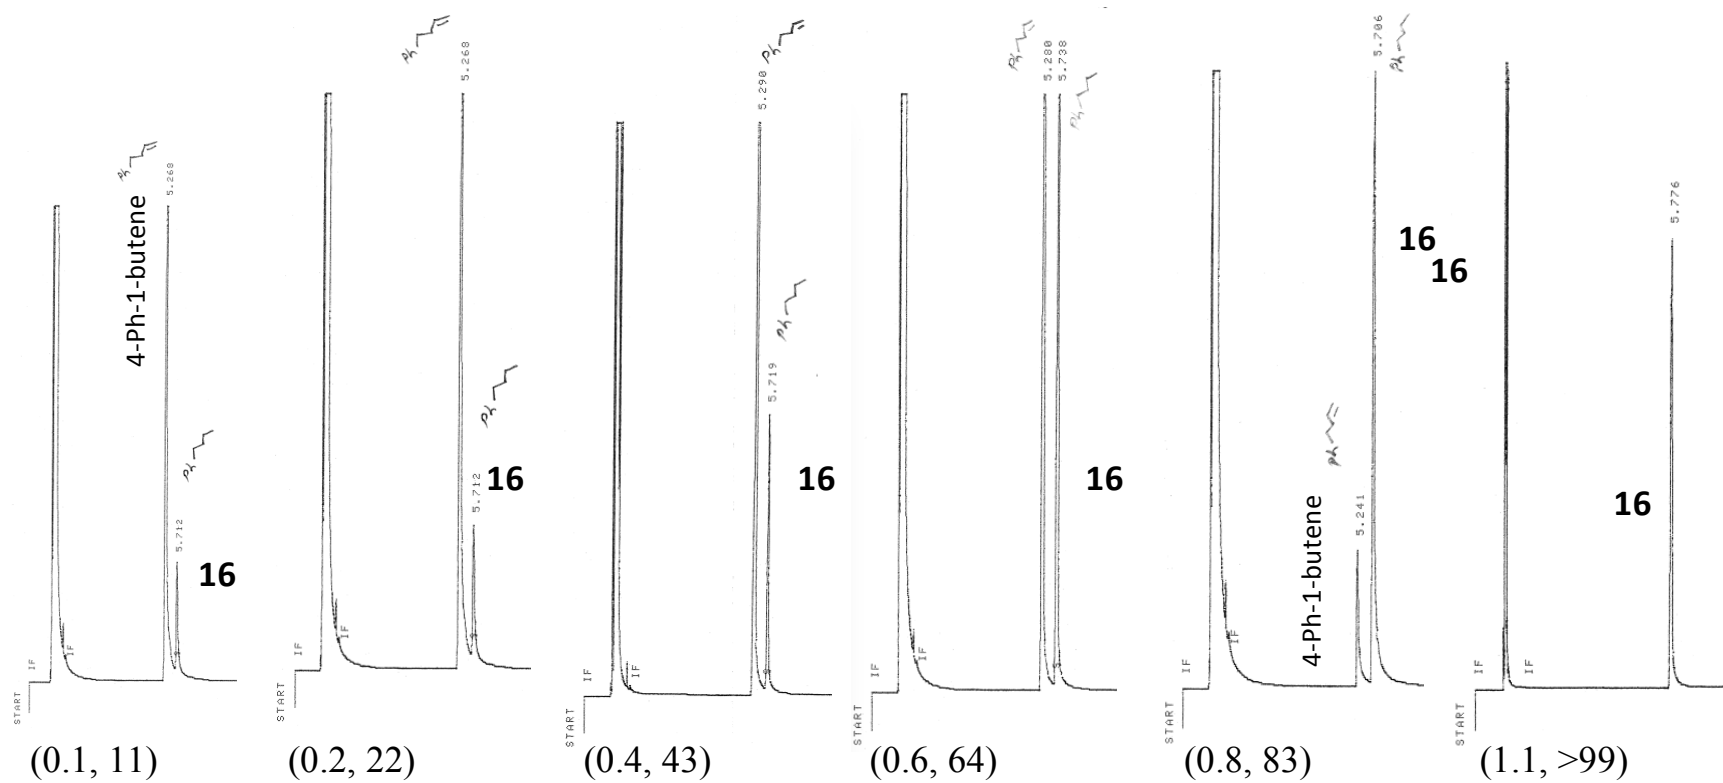

[in bracket: (silane equivalent, % conversion to the product **16**), see Eq 5]

## <sup>1</sup>H and <sup>13</sup>C NMR, GC Retention Times of Reduction Products

### 1-ethyl-4-methylbenzene (10a)

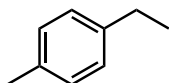

<sup>1</sup>H NMR (600 MHz, CDCl<sub>3</sub>) δ 7.23 (s, 4H), 2.75 (q, <sup>3</sup>J<sub>H, H</sub> = 7.6 Hz, 2H), 2.46 (s, 3H), 1.36 (t, <sup>3</sup>J<sub>H, H</sub> = 7.6 Hz, 3H).

<sup>13</sup>C NMR (150 MHz, CDCl<sub>3</sub>) δ 141.3, 135.0, 129.1, 127.8, 28.5, 21.0, 15.8.

GC (methyl silicone column, 80<sup>0</sup> C/ Isotherm) RT for product = 3.55 min

GC-MS (methyl silicone): m/z ([M<sup>+</sup>]) 120.10; exact mass calculated for C<sub>9</sub>H<sub>12</sub> = 120.09

### 1-ethyl-3-phenoxybenzene (10b)

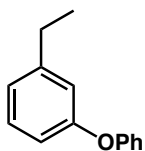

<sup>1</sup>H NMR (400 MHz, CDCl<sub>3</sub>) δ 7.36-7.31 (m, 2H), 7.24 (t, <sup>3</sup>J<sub>H, H</sub> = 7.6 Hz, 1H), 7.11-7.07 (m, 1H), 7.03-7.00 (m, 2H), 6.96-6.94 (m, 1H), 6.88-6.87 (m, 1H), 6.83-6.80 (m, 1H), 2.63 (q, <sup>3</sup>J<sub>H, H</sub> = 7.6 Hz, 2H), 1.23 (t, <sup>3</sup>J<sub>H, H</sub> = 7.6 Hz, 3H).

<sup>13</sup>C NMR (100 MHz, CDCl<sub>3</sub>) δ 158.0, 157.8, 146.9, 130.3, 130.1, 123.6, 123.4, 119.4, 119.1, 116.7, 29.4, 15.9.

GC (methyl silicone column, 140<sup>0</sup> C/) RT for product = 5.88 min

GC-MS (methyl silicone): m/z ([M<sup>+</sup>]) 198.12; exact mass calculated for C<sub>14</sub>H<sub>14</sub>O 198.10

### 1-bromo-3-ethylbenzene (10c)

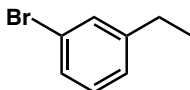

$^1\text{H}$  NMR (400 MHz,  $\text{CDCl}_3$ )  $\delta$  7.34-7.29 (m, 2H), 7.16-7.11 (m, 2H), 2.62(q,  $^3\text{J}$  H, H = 7.6 Hz, 2H), 1.23 (t,  $^3\text{J}$  H, H = 7.6 Hz, 3H).

$^{13}\text{C}$  NMR (100 MHz,  $\text{CDCl}_3$ )  $\delta$  146.9, 131.2, 130.1, 128.9, 126.7, 122.5, 24.8, 15.9.

GC (methyl silicone column,  $100^\circ\text{C}$ ) RT for product = 3.52 min

GC-MS (methyl silicone): m/z ( $[\text{M}^+]$ ) 184.12; exact mass calculated for  $\text{C}_8\text{H}_9\text{Br}$  183.99

#### 4-ethyl-2-fluoro-1, 1'-biphenyl (11)

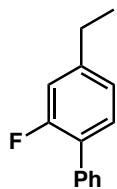

$^1\text{H}$  NMR (400 MHz,  $\text{CDCl}_3$ )  $\delta$  7.57-7.55 (m, 2H), 7.46-7.42 (m, 2H), 7.38-7.34 (m, 2H), 7.07-6.99 (m, 2H), 2.70 (q,  $^3\text{J}$  H, H = 7.6 Hz, 2H), 1.29 (t,  $^3\text{J}$  H, H = 7.6 Hz, 3H).

$^{13}\text{C}$  NMR (100 MHz,  $\text{CDCl}_3$ )  $\delta$  161.2, 158.8, 146.1, 136.2, 130.7, 129.2, 128.6, 127.6, 124.0, 115.4, 28.6, 15.4.

GC (methyl silicone column,  $140^\circ\text{C}$  Isotherm) RT for product = 9.28 min

GC-MS (methyl silicone): m/z ( $[\text{M}^+]$ ) 200.12; exact mass calculated for  $\text{C}_{14}\text{H}_{13}\text{F}$  200.10

#### 5-ethylbenzo[d][1,3]dioxole (12)

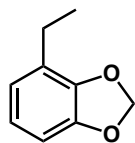

$^1\text{H}$  NMR (600 MHz,  $\text{CDCl}_3$ )  $\delta$  6.74- 6.72 (m, 1H), 6.70-6.69 (m, 1H), 6.65-6.63 (m, 1H), 5.92 (s, 2H), 2.57 (q,  $^3\text{J}$ , H, H = 7.6 Hz, 2H), 1.20 (t,  $^3\text{J}$ , H, H = 7.6 Hz, 3H),

$^{13}\text{C}$  NMR (150 MHz,  $\text{CDCl}_3$ ) 147.6, 145.5, 138.3, 120.5, 108.5, 108.2, 100.8, 28.7, 16.1.

GC (methyl silicone column,  $100^\circ\text{C}$  Isotherm) RT for product = 6.24 min

GC-MS (methyl silicone): m/z ( $[\text{M}^+]$ ) 150.10; exact mass calculated for  $\text{C}_9\text{H}_{10}\text{O}_2$  = 150.07

### 2-ethyl-6-methoxynaphthalene (13)

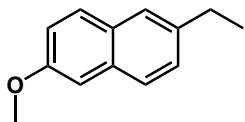

$^1\text{H}$  (400 MHz,  $\text{CDCl}_3$ )  $\delta$  7.69-7.56 (m, 3H), 7.33-7.31 (m, 1H), 7.14-7.11 (m, 2H), 3.91 (s, 3H), 2.79 (q,  $^3\text{J}_{\text{H}}$ ,  $\text{H} = 7.6$  Hz, 2H), 1.32 (t,  $^3\text{J}_{\text{H}}$ ,  $\text{H} = 7.6$  Hz, 3H).

$^{13}\text{C}$  (100 MHz,  $\text{CDCl}_3$ )  $\delta$  157.3, 139.6, 133.1, 129.4, 129.1, 127.7, 126.9, 125.6, 118.8, 105.9, 55.5, 29.0, 15.8.

GC (methyl silicone column,  $140^\circ\text{C}$ /Isotherm) RT for product = 7.48 min

GC-MS (methyl silicone):  $m/z$  ( $[\text{M}^+]$ ) 186.12; exact mass calculated for  $\text{C}_{13}\text{H}_{14}\text{O}$  186.10

### 2-ethyl-5-methoxybenzofuran (14)

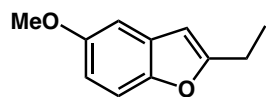

$^1\text{H}$  NMR (400 MHz,  $\text{CDCl}_3$ )  $\delta$  7.29-7.27 (d, 1H), 6.96-6.95 (d, 1H), 6.81-6.78 (dd, 1H), 6.31-6.30 (d, 1H), 3.82 (s, 3H), 2.80-2.74 (m, 2H), 1.31 (t,  $^3\text{J}_{\text{H,H}} = 7.5$  Hz, 3H).

$^{13}\text{C}$  NMR (100 MHz,  $\text{CDCl}_3$ )  $\delta$  162.0, 155.8, 149.7, 129.7, 111.4, 111.1, 103.3, 101.3, 65.9, 56.0, 22.0, 12.0.

GC (methyl silicone column,  $120^\circ\text{C}$ / Isotherm) RT for product = 7.85 min

GC-MS (methyl silicone):  $m/z$  ( $[\text{M}^+]$ ) 176.10; exact mass calculated for  $\text{C}_{11}\text{H}_{12}\text{O}_2$  176.08

### Butylbenzene (16)

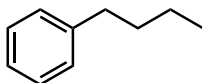

$^1\text{H}$  NMR (400 MHz,  $\text{CDCl}_3$ )  $\delta$  7.26 – 7.19 (m, 3H), 7.15 – 7.12 (m, 2H), 2.58 (t,  $^3J_{\text{H,H}} = 7.7$  Hz, 2H), 1.61-1.54 (m, 2H), 1.37-1.28 (m, 2H), 0.90 (t,  $^3J_{\text{H,H}} = 7.3$  Hz, 3H).

$^{13}\text{C}$  NMR (100 MHz,  $\text{CDCl}_3$ )  $\delta$  143.0, 128.6, 128.4, 125.7, 35.8, 33.8, 22.5, 14.1.

GC (methyl silicone column,  $80^\circ\text{C}$ /Isotherm) RT for product = 3.27 min

GC-MS (methyl silicone):  $m/z$  ( $[\text{M}^+]$ ) 134.10; exact mass calculated for  $\text{C}_{10}\text{H}_{14}$  134.11

### 1-(*iso*-butyl)-4-isobutylbenzene (17b)

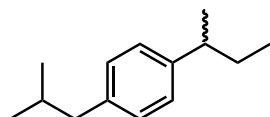

$^1\text{H}$  NMR (400 MHz,  $\text{CDCl}_3$ )  $\delta$  7.14-7.07 (m, 4H), 2.64-2.55 (m, 1H), 2.47 (d,  $^3J_{\text{H,H}} = 7.5$  Hz, 2H), 1.93-1.83 (m, 1H), 1.65-1.57 (m, 2H), 1.26 (d,  $^3J_{\text{H,H}} = 6.9$  Hz, 3H), 0.93 (d,  $^3J_{\text{H,H}} = 6.6$  Hz, 6H), 0.85 (t,  $^3J_{\text{H,H}} = 7.4$  Hz, 3H)

$^{13}\text{C}$  NMR (100 MHz,  $\text{CDCl}_3$ )  $\delta$  145.1, 139.2, 129.2, 127.0, 45.4, 41.5, 31.5, 30.5, 22.7, 22.1, 12.5.

GC (methyl silicone column,  $100^\circ\text{C}$ /Isotherm) RT for product = 7.15 min

GC-MS (methyl silicone):  $m/z$  ( $[\text{M}^+]$ ) 190.10; exact mass calculated for  $\text{C}_{14}\text{H}_{22}$  190.17

### 1-(*sec*-butyl)-3-chlorobenzene (17a)

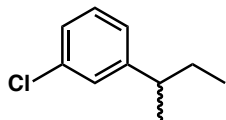

$^1\text{H}$  NMR (400 MHz,  $\text{CDCl}_3$ )  $\delta$  7.24 - 7.14 (m, 4H), 2.62 – 2.53 (m, 1H), 1.62-1.55 (m, 2H), 1.30 (d,  $^3J_{\text{H,H}} = 6.9$  Hz, 3H), 0.90 (t,  $^3J_{\text{H,H}} = 7.4$  Hz, 3H).

$^{13}\text{C}$  NMR (100 MHz,  $\text{CDCl}_3$ )  $\delta$  149.9, 134.2, 129.6, 127.4, 126.1, 125.5, 41.7, 31.2, 21.8, 12.3.

GC (methyl silicone column,  $100^\circ\text{C}$ /Isotherm) RT for product = 3.52 min

GC-MS (methyl silicone):  $m/z$  ( $[\text{M}^+]$ ) 168.10; exact mass calculated for  $\text{C}_{10}\text{H}_{13}\text{Cl}$  168.07

### 4-(*sec*-butyl)-2-fluoro-1, 1'-biphenyl (18)

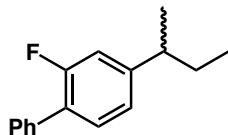

$^1\text{H}$  NMR (400 MHz,  $\text{CDCl}_3$ )  $\delta$  7.60 - 7.57 (m, 2H), 7.48-7.44 (m, 2H), 7.40-7.35 (m, 2H), 7.07 - 6.99 (m, 2H), 2.71 - 2.62 (m, 1H), 1.69-1.62 (m, 2H), 1.30 (d,  $^3J_{\text{H,H}} = 6.9$  Hz, 3H), 0.90 (t,  $^3J_{\text{H,H}} = 7.4$  Hz, 3H).

$^{13}\text{C}$  NMR (100 MHz,  $\text{CDCl}_3$ )  $\delta$  161.1, 158.6, 149.6, 136.1, 130.5, 129.0, 128.5, 127.4, 123.2, 114.4, 41.4, 31.1, 21.7, 12.3.

GC (methyl silicone column,  $180^\circ\text{C}$ /Isotherm) RT for product = 3.14 min

GC-MS (methyl silicone):  $m/z$  ( $[\text{M}^+]$ ) 228.10; exact mass calculated for  $\text{C}_{16}\text{H}_{17}\text{F}$  228.13

#### 4-ethyloctan-2-one (19)

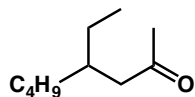

$^1\text{H}$  NMR (400 MHz,  $\text{CDCl}_3$ )  $\delta$  2.32 (d,  $J = 6.8$  Hz, 2H), 2.11 (s, 3H), 1.80(q,  $J = 6.4$  Hz, 1H), 1.32 - 1.20 (m, 8H), 0.89 - 0.81 (two triplets superimposed, 3H each).

$^{13}\text{C}$  NMR (100 MHz,  $\text{CDCl}_3$ )  $\delta$  209.4, 48.4, 35.3, 33.1, 30.3, 29.7, 28.8, 26.3, 22.9, 14.0, 10.8.

GC (methyl silicone column,  $100^\circ\text{C}$ /Isotherm) RT for product = 2.56 min

GC-MS (methyl silicone):  $m/z$  ( $[\text{M}^+]$ ) 156.30. exact mass calculated for  $\text{C}_{10}\text{H}_{20}\text{O}$  156.27.

#### (cis, trans)-3-ethyl-7-oxabicyclo[4.1.0]heptane (23)

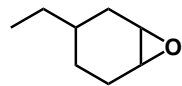

$^1\text{H}$  NMR (400 MHz,  $\text{CDCl}_3$ )  $\delta$  3.79- 3.69 (m, 4H), 1.19-1.1.42 (m, 16H), 0.83- 0.78 (m, 2H), 0.12- 0.04 (m, 6H).

$^{13}\text{C}$  NMR (100 MHz,  $\text{CDCl}_3$ )  $\delta$  36.3, 34.8, 34.7, 31.8, 29.2, 27.1, 25.5, 22.8, 21.6, 20.9, 18.9, 14.2, 11.6.

GC (methyl silicone column,  $100^\circ\text{C}$ / Isotherm) RT for product = 4.01 min and 4.06 min in the ratio of 59: 41

GC-MS (methyl silicone):  $m/z$  ( $[M^+]$ ) 126.19; exact mass calculated for  $C_8H_{14}O = 126.10$

#### 4-(*tert*-butyl)-1-ethylcyclohex-1-ene (25a)

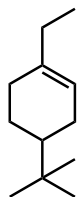

$^1H$  NMR (400 MHz,  $CDCl_3$ )  $\delta$  5.39-5.38 (m, 1H), 2.04 – 1.92 (m, 4H), 1.83-1.72(m, 2H), 1.32-1.26 (m, 1H), 1.23-1.11 (m, 2H), 0.98 (t,  $^3J_H$ ,  $H = 7.5$  Hz, 3H), 0.86 (s, 9H)

$^{13}C$  NMR (100 MHz,  $CDCl_3$ )  $\delta$  139.6, 119.8, 44.6, 32.5, 30.4, 30.1, 27.5, 27.0, 24.6, 12.7.

GC (methyl silicone column, 100  $^{\circ}C$ / Isotherm) RT for product = 3.56 min

GC-MS (methyl silicone):  $m/z$  ( $[M^+]$ ) 166.17; exact mass calculated for  $C_{12}H_{22}$  166.10

#### 4-ethyl-1, 2, 3, 6-tetrahydro-1, 1'-biphenyl (25b)

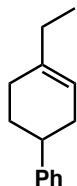

$^1H$  (400 MHz,  $CDCl_3$ )  $\delta$  7.31-7.27 (m, 2H), 7.23-7.16 (m, 3H), 5.48-5.47 (m, 1H), 2.78 – 2.70 (m, 1H), 2.19-1.92 (m, 6H), 1.81-1.70 (m, 2H), 1.02 (t,  $^3J_H$ ,  $H = 7.5$  Hz, 3H).

$^{13}C$  NMR (100 MHz,  $CDCl_3$ )  $\delta$  147.5, 139.5, 128.4, 127.0, 125.9, 119.1, 53.5, 40.4, 33.6, 30.3, 29.1, 12.4.

GC (methyl silicone column, 100 $^{\circ}C$ / 10 min, rate = 20  $^{\circ}C$ , 250  $^{\circ}C$  = 40 min) RT for product = 12.97 min

GC-MS (methyl silicone):  $m/z$  ( $[M^+]$ ) 186.10; exact mass calculated for  $C_{14}H_{18}$  186.14

#### 1-ethyl-4-methylcyclohex-1-ene (25c)



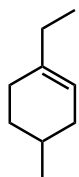

$^1\text{H}$  NMR (400 MHz,  $\text{CDCl}_3$ )  $\delta$  5.32-5.31 (m, 1H), 2.05-1.88(m, 6H), 1.68-1.63 (m, 1H), 1.60-1.54 (m, 2H), 0.95 (t,  $^3\text{J}$  H, H= 7.4 Hz, 6H), 0.91(d,  $^3\text{J}$  H, H= 6.3 Hz, 3H)

$^{13}\text{C}$  NMR (100 MHz,  $\text{CDCl}_3$ )  $\delta$  139.3, 119.0, 34.0, 31.5, 30.4, 29.8, 28.7, 28.5, 12.5

GC (*methyl silicone column*, 40  $^\circ$  C/ Isotherm) RT for product = 4.97 min

GC-MS (*methyl silicone*):  $m/z$  ( $[\text{M}^+]$ ) 124.13; exact mass calculated for  $\text{C}_9\text{H}_{16}$  124.10

### (*E*)-dodec-3-ene (27a)

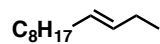

$^1\text{H}$  NMR (400 MHz,  $\text{CDCl}_3$ )  $\delta$  5.47-5.35 (m, 2H), 2.03-1.94(m, 4H), 1.34-1.27 (m, 12 H), 0.98-0.94 (m, 3H), 0.90-0.84(m, 3H).

$^{13}\text{C}$  NMR (100 MHz,  $\text{CDCl}_3$ )  $\delta$  132.1, 129.7, 32.9, 32.2, 30.0, 29.8, 29.6, 29.5, 25.9, 23.0, 14.4, 14.3.

GC (*methyl silicone column*, 100 $^\circ$ C/Isotherm) RT for product = 3.66 min

GC-MS (*methyl silicone*):  $m/z$  ( $[\text{M}^+]$ ) 168.10; exact mass calculated for  $\text{C}_{12}\text{H}_{24}$  168.16

### (*E*)-non-3-ene (27b)

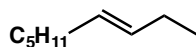

$^1\text{H}$  NMR (400 MHz,  $\text{CDCl}_3$ )  $\delta$  5.46-5.35 (m, 2H), 2.02-1.94(m, 4H), 1.34-1.27 (m, 6 H), 0.98-0.86(m, 6H).

$^{13}\text{C}$  NMR (100 MHz,  $\text{CDCl}_3$ )  $\delta$  131.8, 129.3, 32.5, 31.9, 29.7, 29.3, 25.5, 22.6, 13.9.

GC (*methyl silicone column*, 50  $^\circ$  C/ Isotherm) RT for product = 2.97 min.

GC-MS (*methyl silicone*):  $m/z$  ( $[\text{M}^+]$ ) 126.05; exact mass calculated for  $\text{C}_9\text{H}_{18}$  126.14

### (E)-hex-3-en-1-ol (27c)

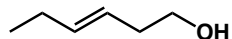

$^1\text{H}$  NMR (400 MHz,  $\text{CDCl}_3$ )  $\delta$  5.53- 5.46 (m, 1H), 5.33- 5.26 (m, 1H) 3.58 (t,  $^3J_{\text{H,H}} = 6.64\text{Hz}$ , 2H), 2.30-2.25 (m, 2H), 2.22 (s, 1H), 2.07- 2.00 (m, 2H), 0.93 (t,  $^3J_{\text{H,H}} = 7.54\text{Hz}$ , 3H).

$^{13}\text{C}$  NMR (100 MHz,  $\text{CDCl}_3$ )  $\delta$  134.9, 124.7, 62.4, 30.9, 20.8, 14.5.

GC (methyl silicone column,  $140^\circ\text{C}$ / Isotherm) RT for product = 3.99 min

GC-MS (methyl silicone):  $m/z$  ( $[\text{M}^+]$ ) 100.10; exact mass calculated for  $\text{C}_6\text{H}_{12}\text{O} = 100.09$

### 3-ethylhept-3-ene (29)

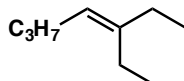

$^1\text{H}$  NMR (400 MHz,  $\text{CDCl}_3$ )  $\delta$  5.08 (t,  $^3J_{\text{H,H}} = 7.1\text{ Hz}$ , 1H), 2.09-1.95(m, 6H), 1.43-1.29(m, 2H), 0.95 (t,  $^3J_{\text{H,H}} = 7.4\text{ Hz}$ , 6H), 0.91(t,  $^3J_{\text{H,H}} = 7.4\text{ Hz}$ , 3H).

$^{13}\text{C}$  NMR (100 MHz,  $\text{CDCl}_3$ )  $\delta$  143.1, 123.0, 31.9, 30.0, 29.9, 23.0, 22.9, 14.4.

GC (methyl silicone column,  $50^\circ\text{C}$ /Isotherm) RT for product = 3.27 min

GC-MS (methyl silicone):  $m/z$  ( $[\text{M}^+]$ ) 220.10; exact mass calculated for  $\text{C}_9\text{H}_{18} = 126.14$

### (2S,4S,E)-2-ethyl-1-ethylidene-4-isopropylcyclohexane and (2S,4R,E)-2-ethyl-1-ethylidene-4-isopropylcyclohexane (30)

The  $^1\text{H}$  NMR and  $^{13}\text{C}$  NMR spectra of the diastereomers were recorded in a mixture.

$^1\text{H}$  NMR (600 MHz,  $\text{CDCl}_3$ )  $\delta$  5.19-5.23 (m, 1H each), 2.62-2.65 (m, 1H, ent-*trans*-), 2.35-2.40 (m, 1H,, 2.13-2.20 (m, 1H each), 1.99 (dt, 1H,  $J = 3.2\text{ Hz}$ , 13.6 Hz, one diastereomer), 1.91 (ddd, 1H,  $J = 2.7\text{ Hz}$ , 8.0 Hz, 13.3 Hz, one diastereomer), 1.66-1.74 (m, 2H, both diastereomers merged), 1.56-1.58 (m, 6H, both diastereomers merged), 1.52-1.54 (m, 1H, one diastereomer), 1.49-1.52 (m, 1H, one diastereomer), 1.44-1.48 (m, 2H, both diastereomers merged), 1.34-1.42 (m, 3H, both diastereomers merged), 1.28-1.33 (m, 3H, both diastereomers merged), 1.10-1.18 (m, 2H, both diastereomers merged), 0.94-1.03 (m, 2H, both diastereomers merged), 0.89 (q, 3H each,  $J = 7.5\text{ Hz}$ , both diastereomer merged), 0.82-0.86 (m, 12H, both diastereomers merged).

$^{13}\text{C}$  NMR (150 MHz,  $\text{CDCl}_3$ )  $\delta$  142.87, 142.32, 116.95, 116.16, 39.82, 39.25, 38.26, 37.21, 34.88, 32.81, 32.74, 32.38, 32.33, 31.59, 30.54, 28.12, 25.37, 22.33, 20.18, 19.88, 19.70, 14.05, 13.15, 12.76, 12.21, 11.96.

GC (*cyclodex-B*, 110  $^\circ\text{C}$ ): See attached GC spectra for diastereomeric ratio and *ee*.

$R_t$  of reduced product from HV-product using  $\text{Co}(\text{dppp})\text{Cl}_2$  ligand: 50.18 min and 48.35 min

$R_t$  reduced product of H- product using  $\text{Co}[(S,S)\text{-BDPP}]\text{Cl}_2$  complex : 50.16 min and 48.01 min.

### **(Z)-4-ethylnon-2-ene (31)**

$^1\text{H}$  NMR (400 MHz,  $\text{CDCl}_3$ )  $\delta$  5.59-5.55 (m, 1H), 5.18 - 5.12 (m, 1H), 2.38 – 2.21(m, 1H), 1.70 – 1.67 (m, 3H), 1.47 – 1.22 (m, 10H), 1.07 – 0.94 (m, 6H).

$^{13}\text{C}$  NMR (100 MHz,  $\text{CDCl}_3$ )  $\delta$  136.2, 123.7, 38.8, 35.9, 32.4, 31.9, 28.9, 27.3, 22.9, 14.4, 12.0.

GC (*methyl silicone column*, 50  $^\circ\text{C}$ /Isotherm) RT for product = 6.42 min

GC-MS (*methyl silicone*):  $m/z$  ( $[\text{M}^+]$ ) 154.10; exact mass calculated for  $\text{C}_{11}\text{H}_{22}$  154.17

### **(E)-((4-ethyloct-2-en-2-yl)oxy)trimethylsilane (33)**

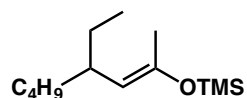

$^1\text{H}$  NMR (400 MHz,  $\text{CDCl}_3$ )  $\delta$  4.35 (dq,  $^3\text{J}$  H, H = 0.8 Hz, 10.1 Hz, 1H), 1.95 – 1.84 (m, 1H), 1.72 (d,  $^3\text{J}$  H, H= 0.9 Hz, 3H), 1.44 – 1.21 (m, 5H), 1.18-1.08 (m, 3H), 0.90-0.82 (m, 6H), 0.18 (s, 9H).

$^{13}\text{C}$  NMR (100 MHz,  $\text{CDCl}_3$ )  $\delta$  147.4, 114.2, 39.7, 36.1, 29.7, 29.4, 22.9, 18.3, 14.1, 11.9, 0.3.

GC (*methyl silicone column*, 100  $^\circ\text{C}$ / Isotherm) RT for product = 4.56 min

GC-MS (*methyl silicone*):  $m/z$  ( $[\text{M}^+]$ ) 228.10; exact mass calculated for  $\text{C}_{10}\text{H}_{12}$  228.19

### **(E)-1-(2-ethylcycloheptylidene)ethoxy)trimethylsilane (35)**

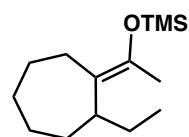

$^1\text{H}$  NMR (400 MHz,  $\text{CDCl}_3$ )  $\delta$  2.53-2.48 (m, 1H), 2.30-2.22 (m, 1H), 1.93-1.86 (m, 1H), 1.79 (s, 3H), 1.76-1.60 (m, 4H), 1.49-1.43 (m, 1H), 1.36-1.18 (m, 3H), 1.13-1.06 (m, 2H), 0.82 (t, 3H,  $J$  = 7.4 Hz).

$^{13}\text{C}$  NMR (100 MHz,  $\text{CDCl}_3$ )  $\delta$  141.7, 122.8, 41.8, 33.9, 31.6, 29.09, 29.07, 26.1, 24.7, 18.4, 12.0, 0.8.

GC (*cyclosil-B*, 90 °C):  $R_t$  from dppp: 73.675 min and 74.592 min; from (*S,S*-BDPP): 73.674 min (98%) and 74.729 min (2%).

GC-MS (*methyl silicone*):  $m/z$  ( $[M^+]$ ) 240.40; exact mass calculated for  $\text{C}_{14}\text{H}_{28}\text{OSi}$  240.19

## References

1. Britovsek, G. J. P.; Bruce, M.; Gibson, V. C.; Kimberley, B. S.; Maddox, P. J.; Mastroianni, S.; McTavish, S. J.; Redshaw, C.; Solan, G. A.; Strömberg, S.; White, A. J. P.; Williams, D. *J. J. Am. Chem. Soc.* **1999**, *121*, 8728.
2. Kim, H. J.; Asif, R.; Chung, D. S.; Hong, J. I. *Tetrahedron Lett.* **2003**, *44*, 4335.
3. Sharma, R. K.; RajanBabu, T. V. *J. Am. Chem. Soc.* **2010**, *132*, 3295 and references cited therein.
4. (a) Gibson, V. C.; Humphries, M. J.; Tellmann, K. P.; Wass, D. F.; White, A. J. P.; Williams, D. J. *Chem. Commun.* **2001**, *2001*, 2252. (b) Kooistra, T. M.; Knijnenburg, Q.; Smits, J. M. M.; Horton, A. D.; Budzelaar, P. H. M.; Gal, A. W. *Angew. Chem. Int. Ed.* **2001**, *40*, 4719.

\*  
BREAK

\*  
BREAK

\*AN  
RUN # 1477    MAY 14, 1901 23:55:56  
START

IF

IF

3.510

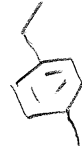

60% Isohexam

BR-06-268  
60% Isohexam

END OF SIGNAL

Closing signal file M:SIGNAL .BNA

RUN# 1477    MAY 14, 1901 23:55:56

SIGNAL FILE: M:SIGNAL.BNA

| AREA% | RT    | AREA    | TYPE | WIDTH | AREA%     |
|-------|-------|---------|------|-------|-----------|
|       | 3.510 | 4168562 | SHB  | .034  | 100.00000 |

TOTAL AREA=4168562  
MUL FACTOR=1.0000E+00

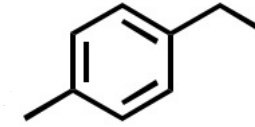

10a (Crude product)

140c / Isotherm  
CCc1ccc(O)cc1

\* BREAK  
\* BREAK  
\* BREAK  
\* BREAK

\*AN  
RUN # 1333 MAY 3, 1981 01:47:08  
START

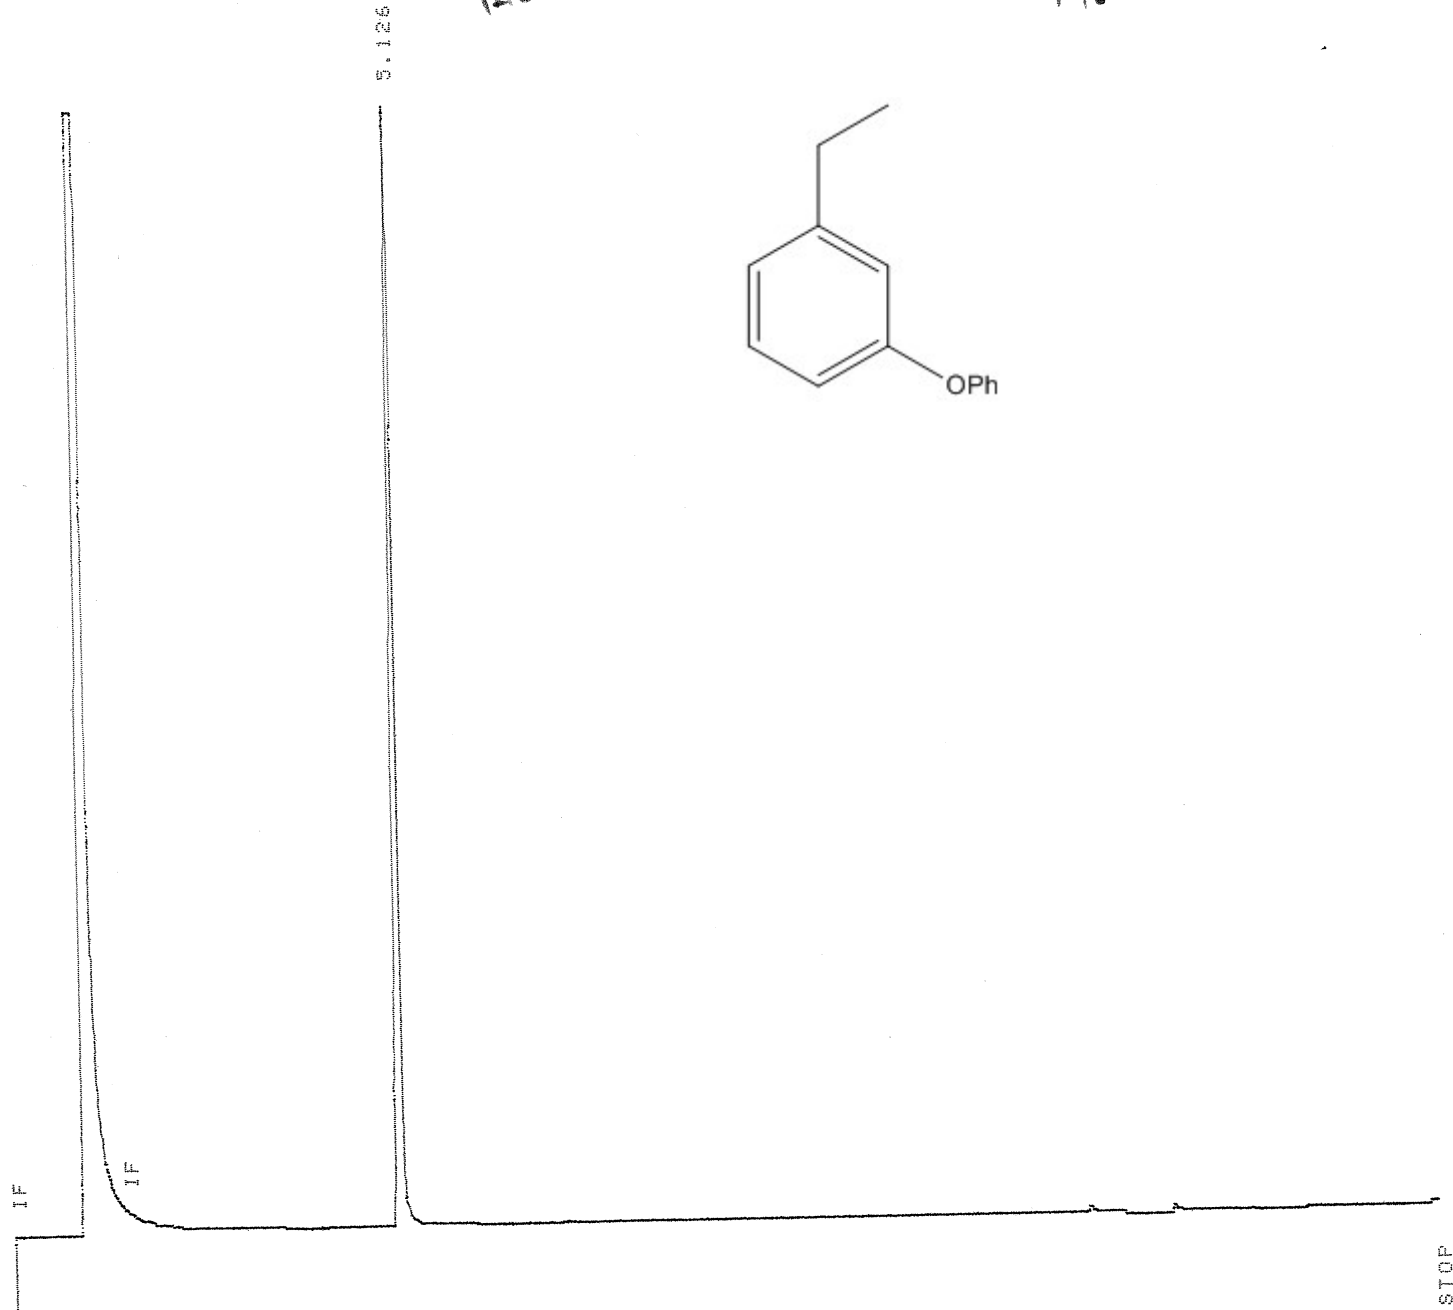

140c / Isotherm  
BR-07-54  
140c / Isotherm

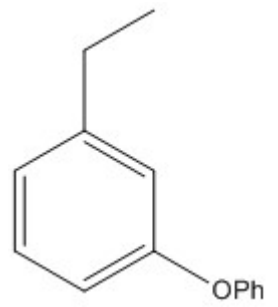

STOP

Closing signal file M:SIGNAL.BNC  
RUN# 1333 MAY 3, 1981 01:47:08

SIGNAL FILE: M:SIGNAL.BNC

| AREA% | RT    | AREA    | TYPE | WIDTH | AREA%    |
|-------|-------|---------|------|-------|----------|
|       | 5.126 | 4041269 | PB   | .061  | 100.0000 |

TOTAL AREA=4041269  
AHL FACTOR=1.0000E+00

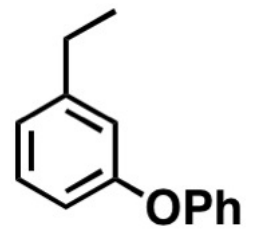

10b

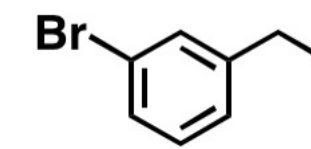

10c

*100c / Bohm*

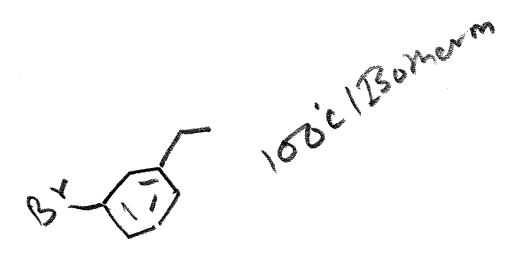

BR-07-267  
100c / Bohm

\* BREAK  
\* BREAK  
\* BREAK  
\* BREAK  
\* BREAK

\*AN  
RUN # 2246    OCT 1, 1901 23:41:50  
START

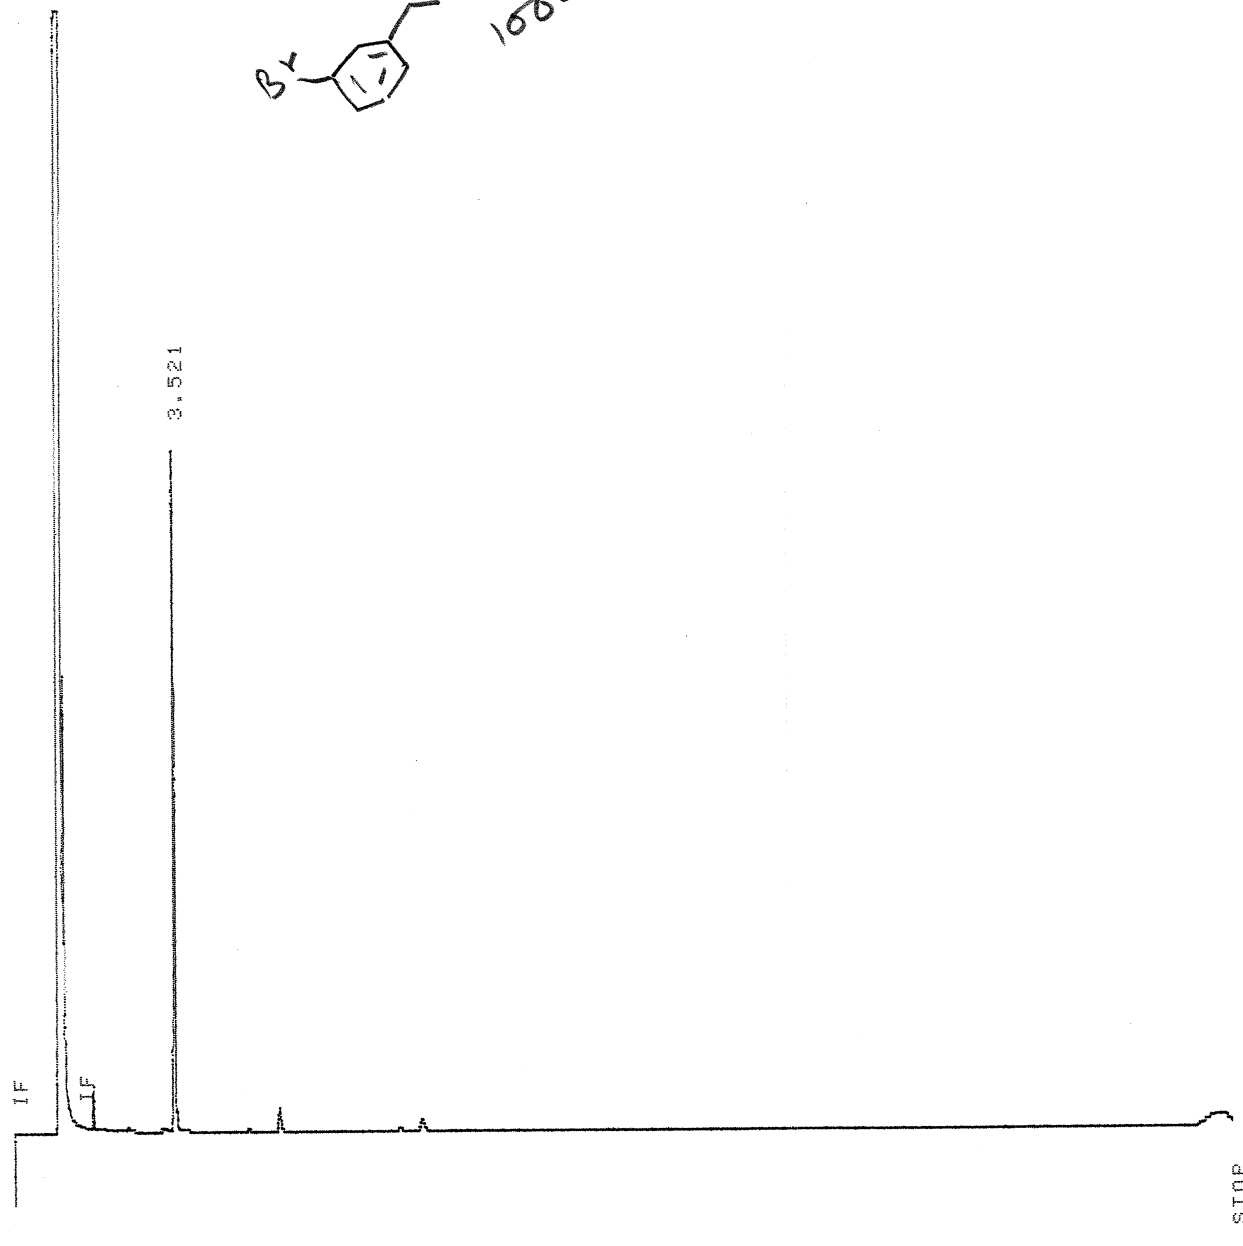

STOP

Error storing signal to M:SIGNAL .BMA  
DIRECTORY FULL  
Storing processed peaks to M:SIGNAL .PRA

RUN# 2246    OCT 1, 1901 23:41:50

PEAK FILE : M:SIGNAL.PRA

| AREA% | RT      | AREA | TYPE | WIDTH     | AREA% |
|-------|---------|------|------|-----------|-------|
| 3.521 | 1474335 | SBB  | .039 | 100.00000 |       |

TOTAL AREA=1474335  
MIN FACTOR=1.0000E+00

File :D:\MSDCHEMData\Babu\Balaram\BR-07-267.D  
Operator : BALARAM  
Acquired : 28 Sep 2015 9:39 using AcqMethod 100-ISOTHERM.M  
Instrument : GCMS  
Sample Name: BR-07-267  
Misc Info :  
Vial Number: 1

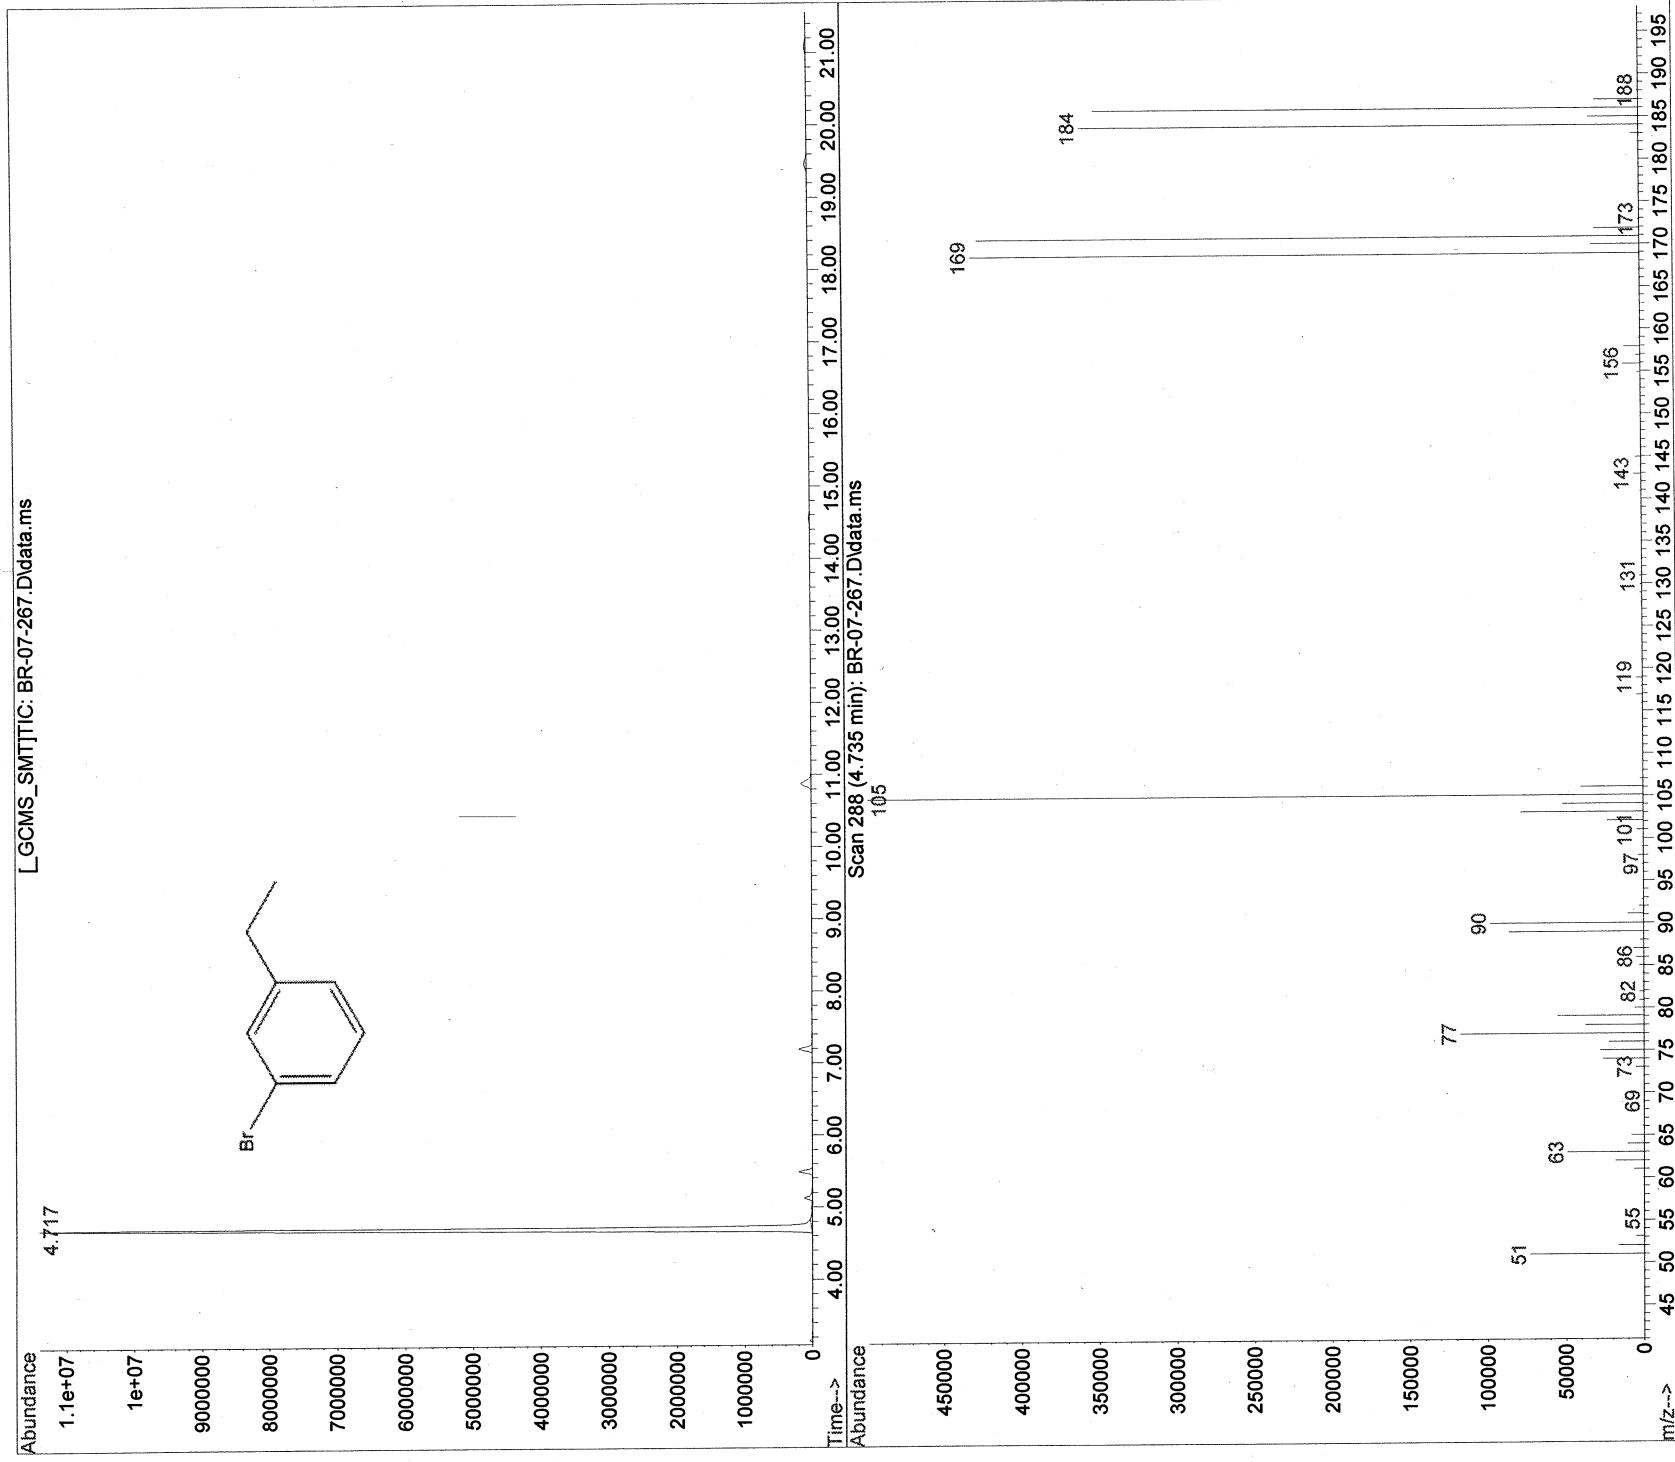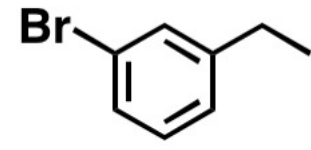

10c



\* BREAK  
\* BREAK  
\* BREAK  
\* BREAK

\*\*\*  
RUN # 1222 JUN 1, 1991 00:43:56  
START

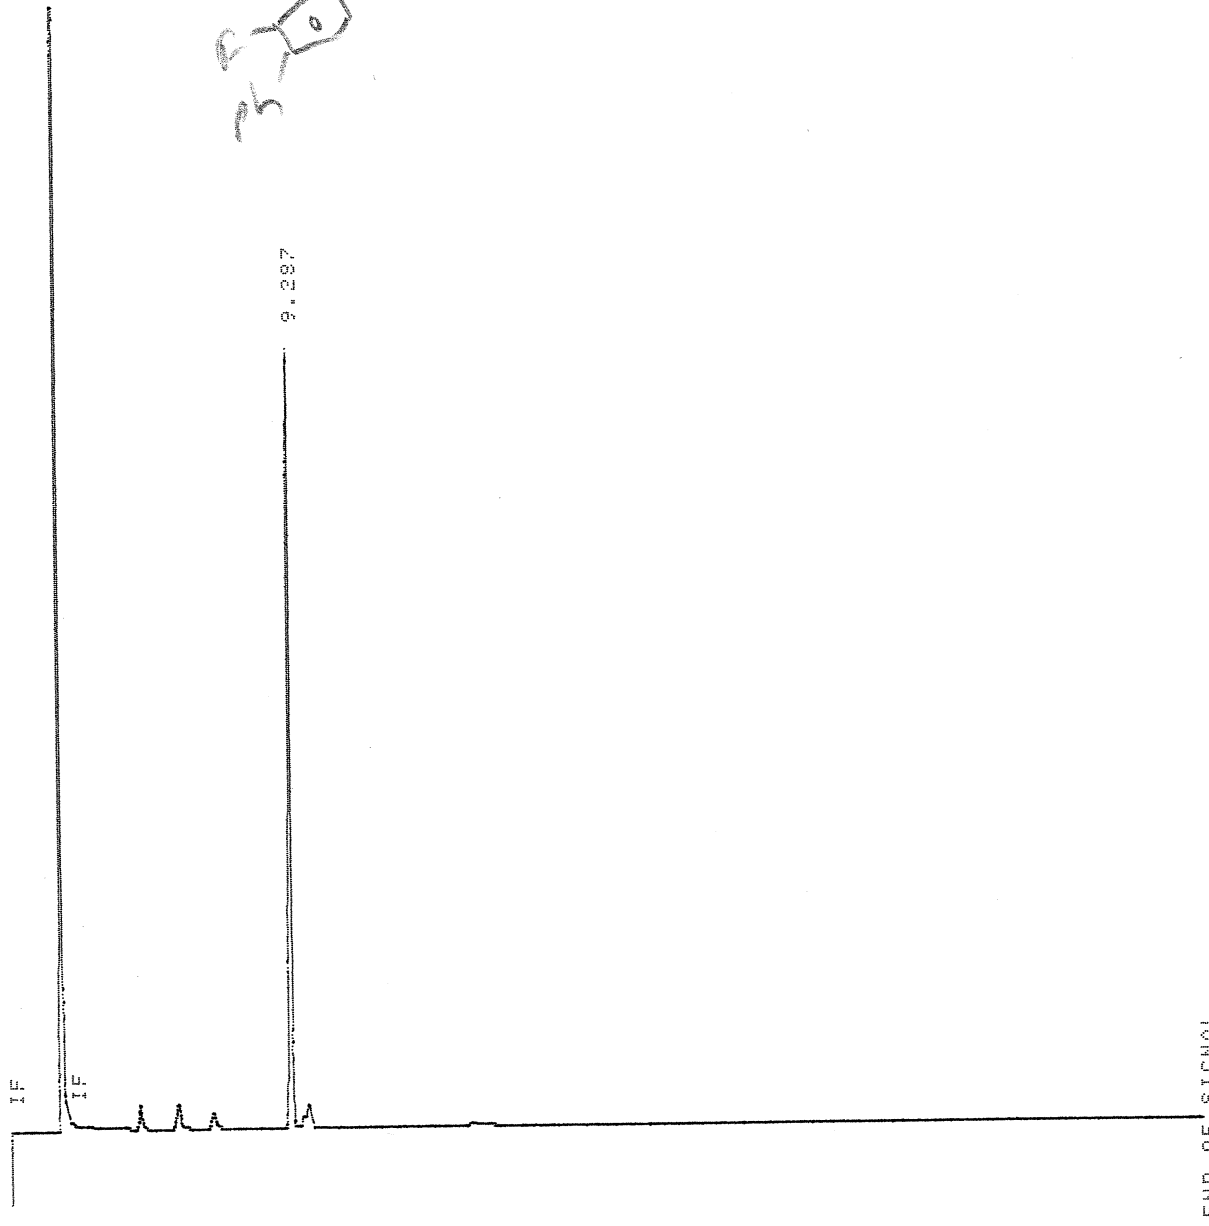

BR-07-14  
1401 Barmm

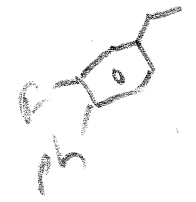

BR-07-14  
1401 Barmm

END OF SIGNAL  
Error storing signal to M:SIGNAL .BNA  
DIRECTORY FULL  
Storing processed peaks to M:SIGNAL .PRO  
RUN# 1222 JUN 1, 1991 00:43:56  
PEAK FILE : M:SIGNAL.PRO  
AREA#  
RT AREA TYPE WIDTH AREA  
9.287 416822 PB .097 100.0000  
TOTAL AREA=416822  
MUL FACTOR=1.0000E+00

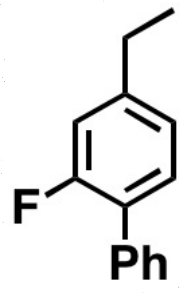

File :D:\MSDCHEMData\Babu\Balaram\BR-07-14.D  
Operator : BALARAM  
Acquired : 22 May 2015 20:13 using AcqMethod 140-Isotherm.M  
Instrument : GCMS  
Sample Name: BR-07-14  
Misc Info :  
Vial Number: 1

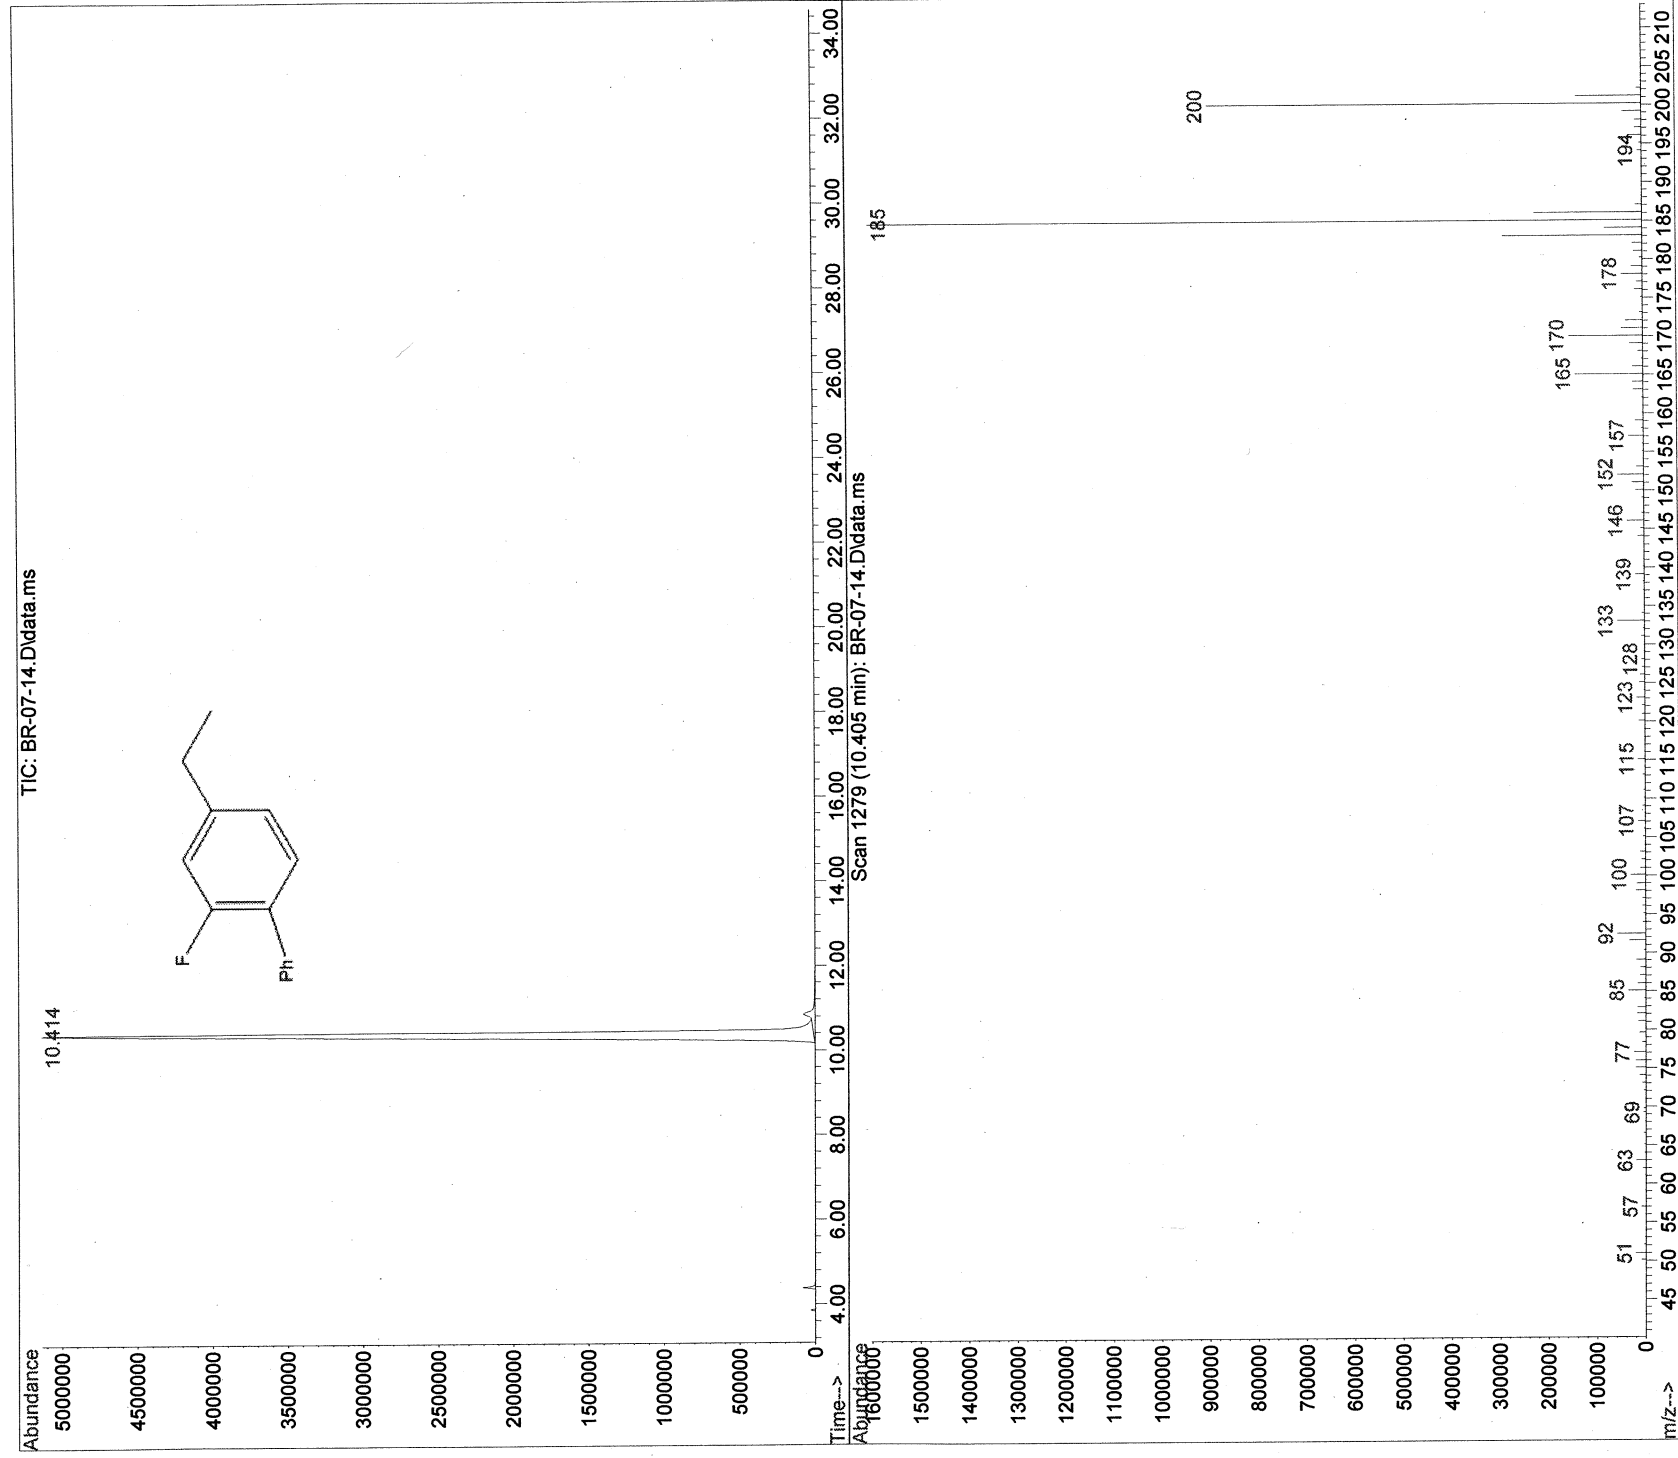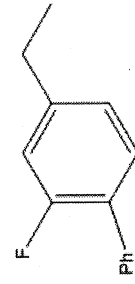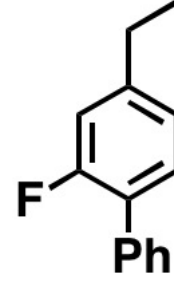

11

7.561  
7.552  
7.549  
7.463  
7.458  
7.445  
7.441  
7.429  
7.426  
7.383  
7.381  
7.377  
7.374  
7.364  
7.359  
7.353  
7.343  
7.248  
7.070  
7.066  
7.051  
7.047  
7.031  
7.001  
6.997

2.730  
2.711  
2.692  
2.673

1.311  
1.273

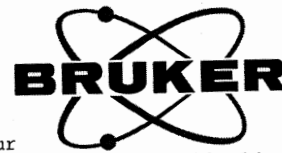

Cur  
NAME BR-067-14  
EXPNO 1  
PROCNO 1

F2 - Acquisition Parameters  
Date\_ 20150516  
Time 1.50  
INSTRUM spect  
PROBHD 5 mm PABBO BB/  
PULPROG zg30  
TD 65536  
SOLVENT CDCl3  
NS 64  
DS 2  
SWH 8223.685 Hz  
FIDRES 0.125483 Hz  
AQ 3.9845889 sec  
RG 79.06  
DW 60.800 usec  
DE 6.50 usec  
TE 301.5 K  
D1 1.00000000 sec  
TD0 1

==== CHANNEL f1 =====  
SF01 400.1724712 MHz  
NUC1 1H  
P1 15.00 usec  
PLW1 13.19999981 W

F2 - Processing parameters  
SI 65536  
SF 400.1700142 MHz  
WDW EM  
SSB 0  
LB 0.30 Hz  
GB 0  
PC 1.00

Faculty Group Rajanbabu987  
PROTON\_OSU CDCl3 {C:\Bruker\TopSpin3.0} raya.5 96

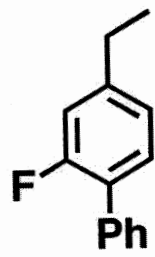

11

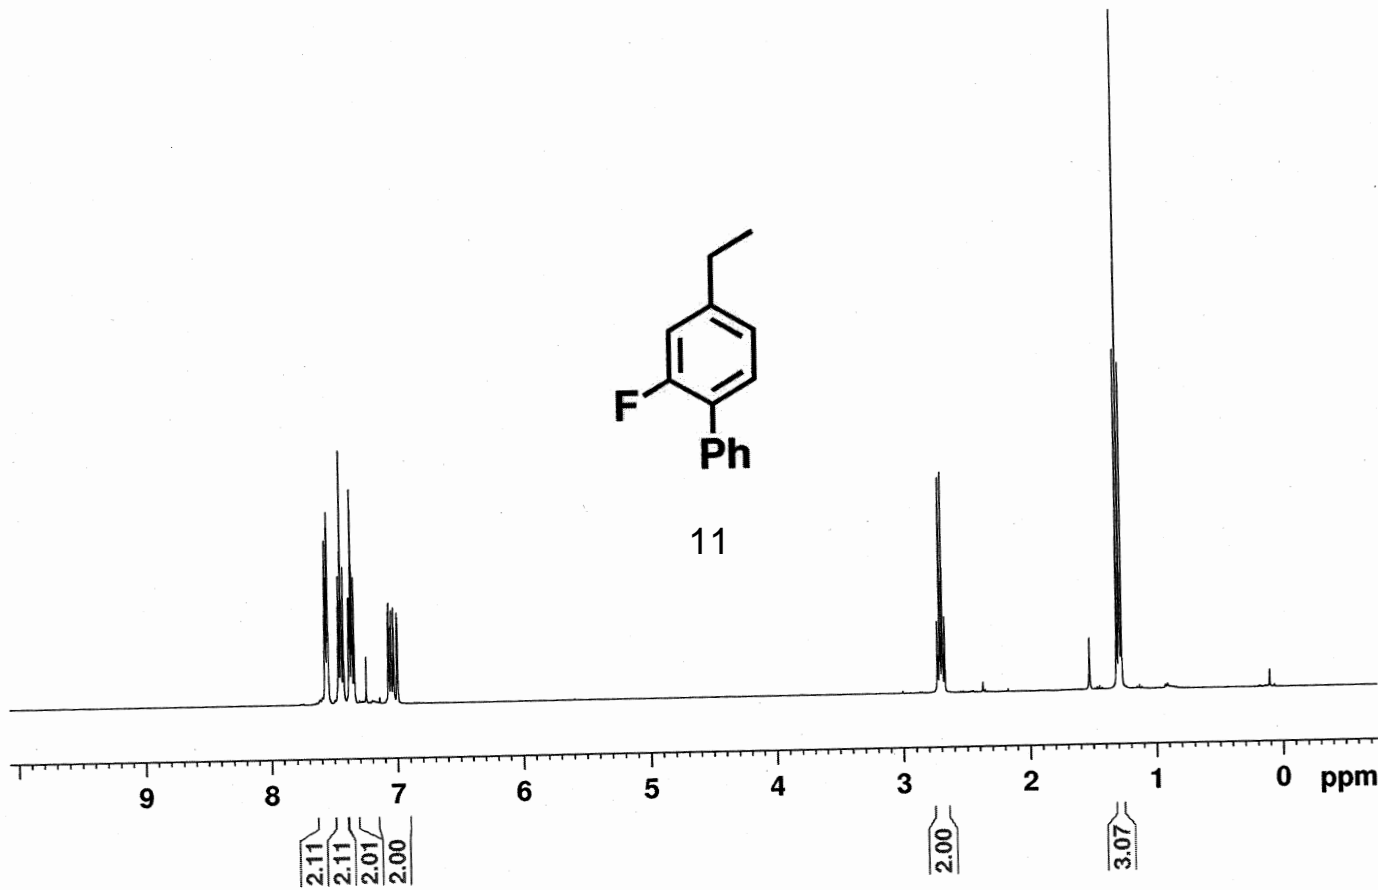

161.22  
158.76  
146.09  
136.21  
130.70  
129.16  
128.59  
127.58  
124.03  
115.46

77.54  
77.22  
76.91

— 28.58

— 15.40

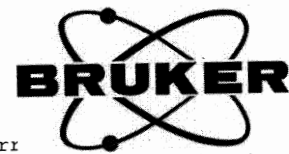

Curr  
NAME BR-067-14  
EXPNO 2  
PROCNO 1

F2 - Acquisition Parameters

Date\_ 20150516  
Time 2.51  
INSTRUM spect  
PROBHD 5 mm PABBO BB/  
PULPROG zgpg30  
TD 65536  
SOLVENT CDC13  
NS 1024  
DS 4  
SWH 24038.461 Hz  
FIDRES 0.366798 Hz  
AQ 1.3631488 sec  
RG 2050  
DW 20.800 usec  
DE 6.50 usec  
TE 303.3 K  
D1 2.00000000 sec  
D11 0.03000000 sec  
TD0 1

==== CHANNEL f1 =====  
SFO1 100.6328883 MHz  
NUC1 13C  
P1 9.50 usec  
PLW1 53.29999924 W

==== CHANNEL f2 =====  
SFO2 400.1716007 MHz  
NUC2 1H  
CPDPRG[2] waltz16  
PCPD2 80.00 usec  
PLW2 14.60000038 W  
PLW12 0.51327997 W  
PLW13 0.32850000 W

F2 - Processing parameters  
SI 32768  
SF 100.6228056 MHz  
WDW EM  
SSB 0  
LB 1.00 Hz  
GB 0  
PC 1.40

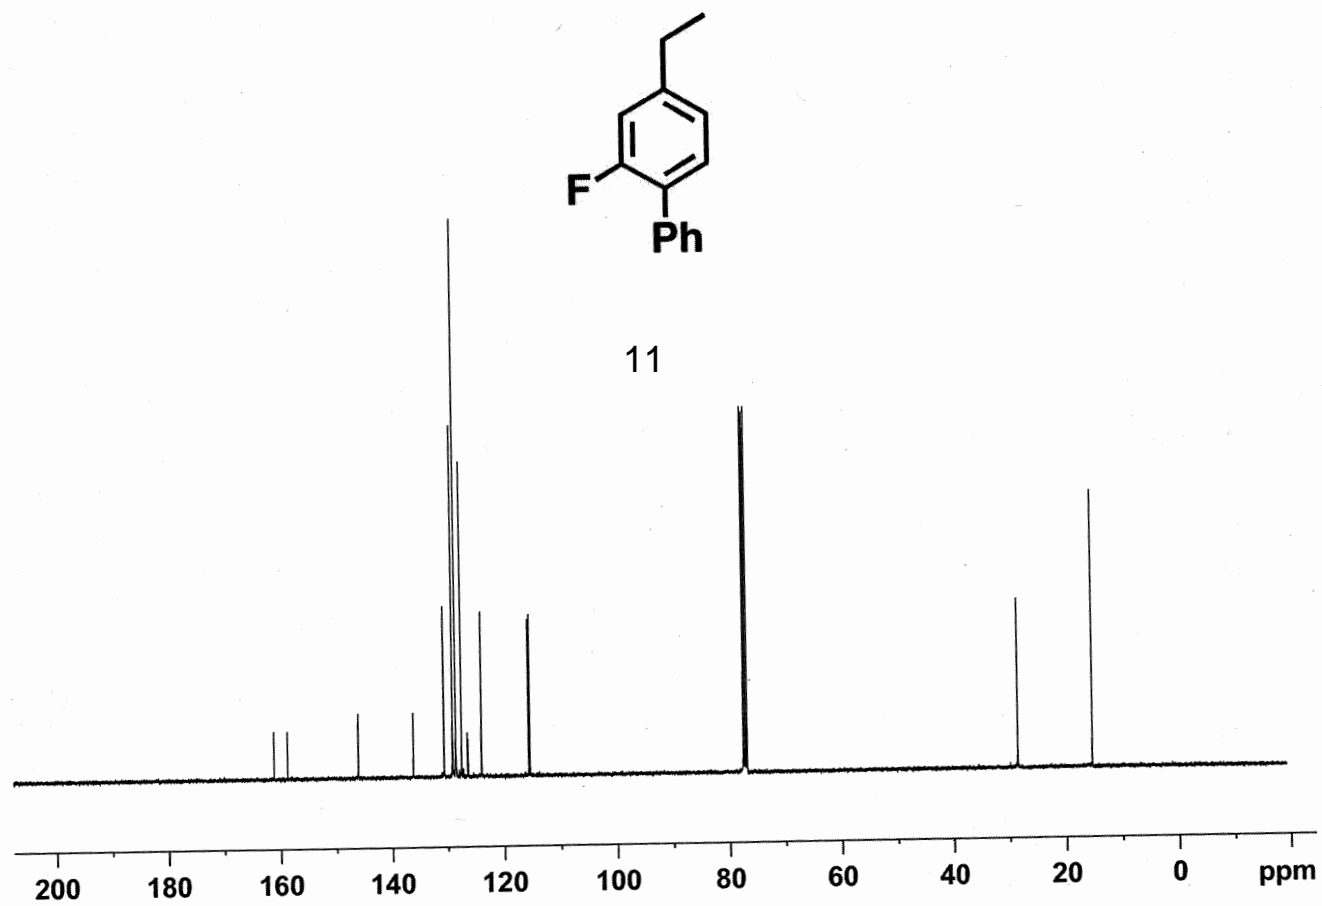

MUL FACTOR=1.0000E+00

\*  
BREAK  
\*  
BREAK  
\*  
BREAK  
\*  
BREAK

\* ON # 1229 MAY 31, 1991 17:15:16  
RUN # 1229 MAY 31, 1991 17:15:16  
START

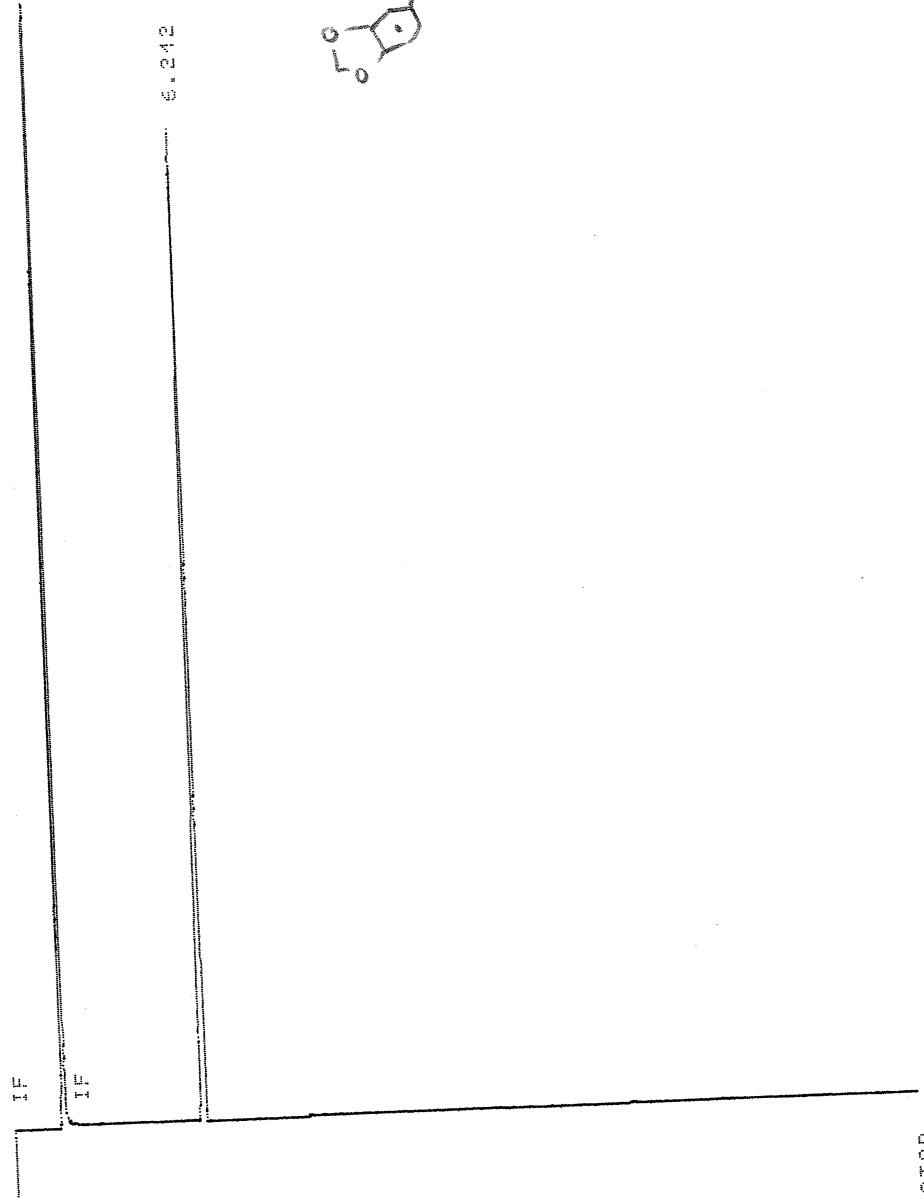

100% Boherm

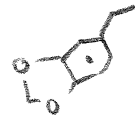

STOP

BR-07-24  
100% Boherm

Error storing signal to M:SIGNAL .BNA  
DIRECTORY FULL  
Stopping processed peaks to M:SIGNAL .PRO

RUN# 1229 MAY 31, 1991 17:15:16

| PEAK | RT    | AREA     | TYPE | WIDTH | AREA%     |
|------|-------|----------|------|-------|-----------|
| 1    | 6.212 | 19163376 | SBS  | .093  | 100.00000 |

TOTAL AREA=1.01633E+07  
MUL FACTOR=1.0000E+00

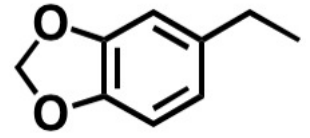

12

File : D:\MSDCHEMData\Babu\Balaram\BR-07-24.D  
Operator : BALARAM  
Acquired : 22 May 2015 17:54 using AcqMethod 100-ISOTHERM.M  
Instrument : GCMS  
Sample Name: BR-07-24  
Misc Info :  
Vial Number: 1

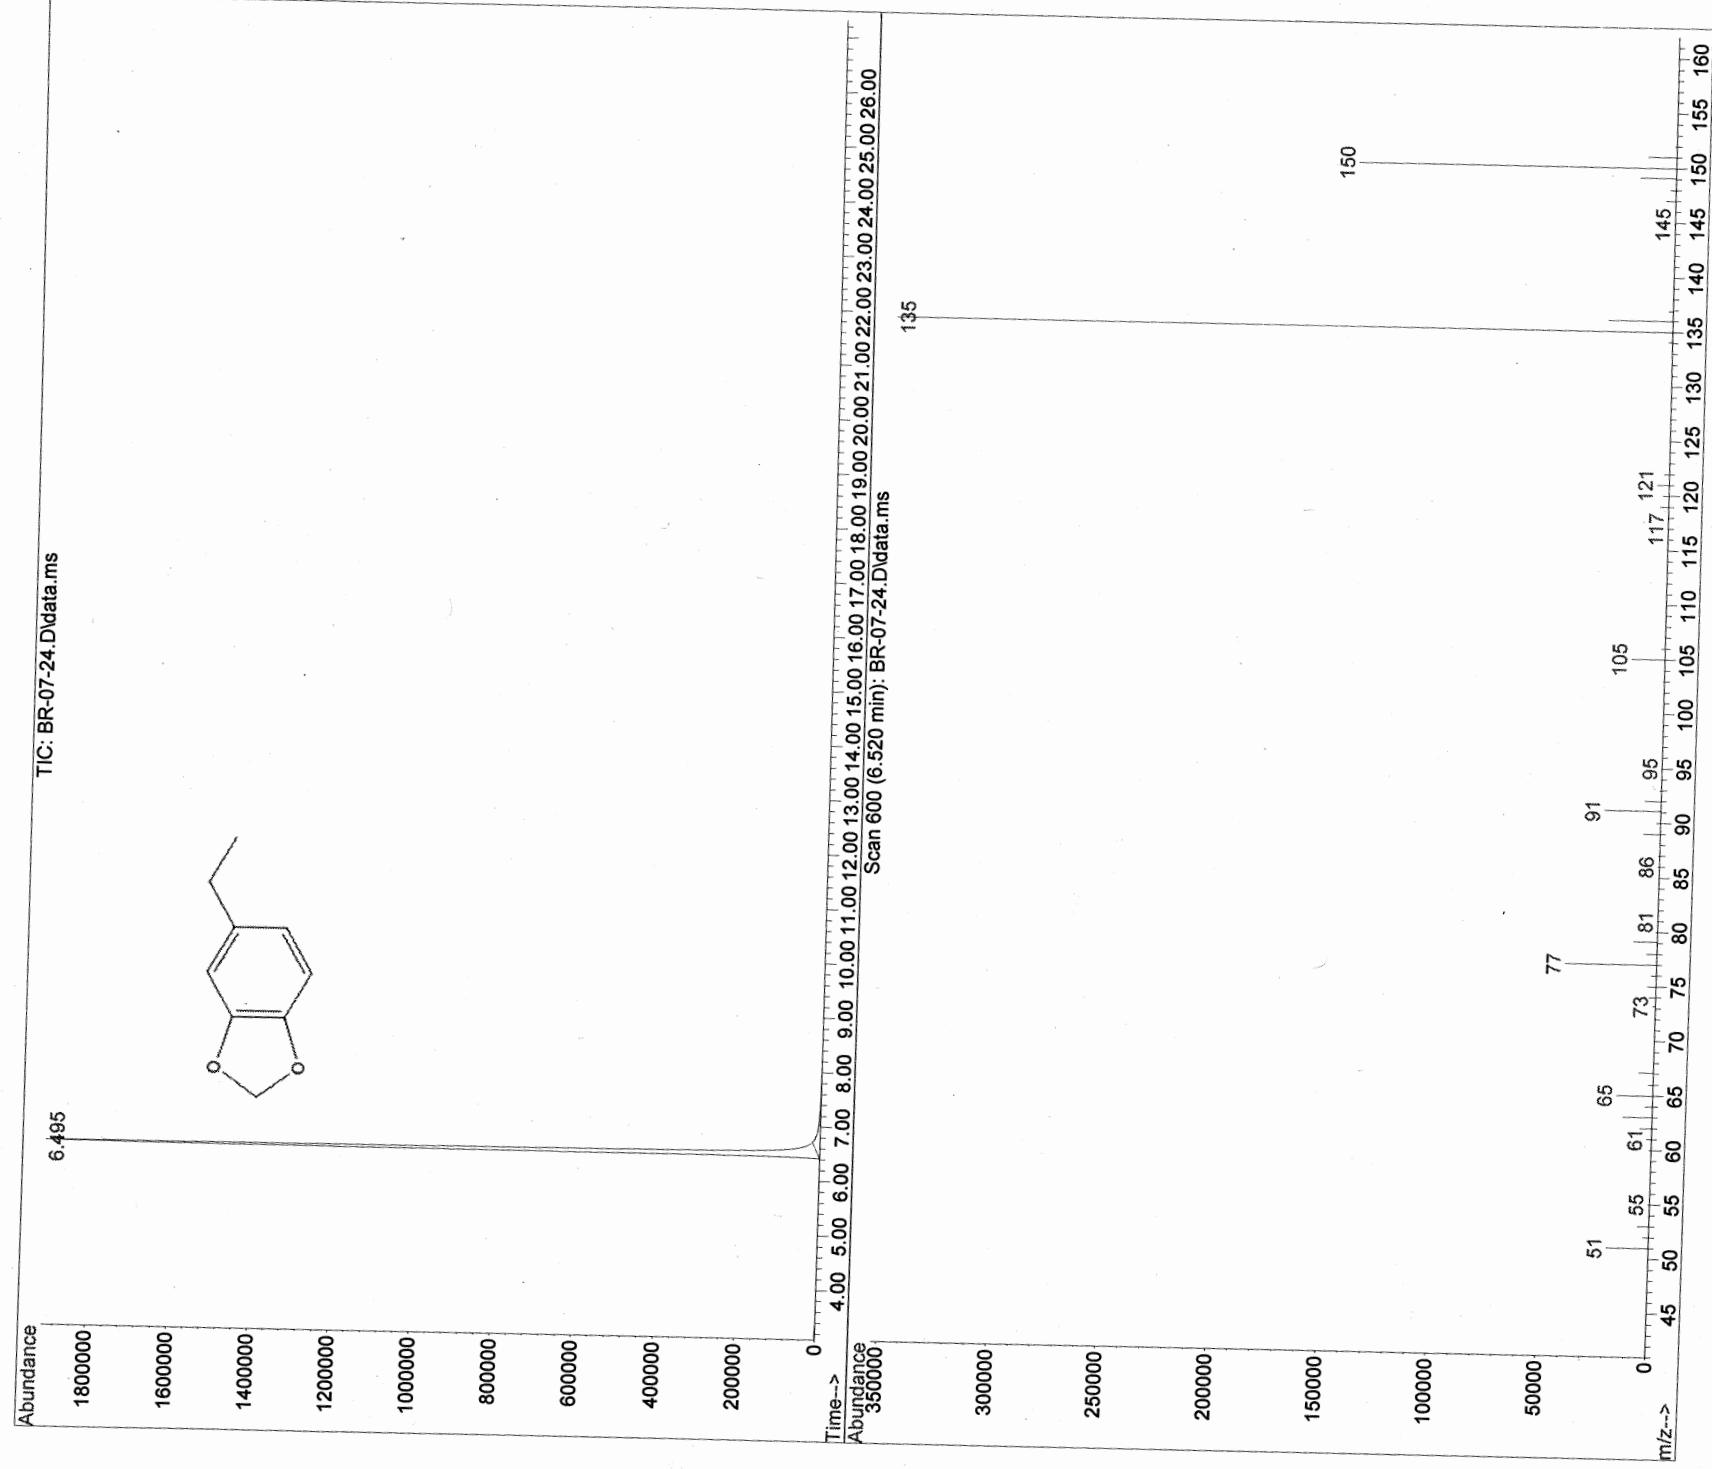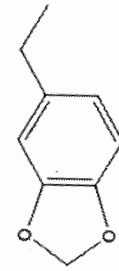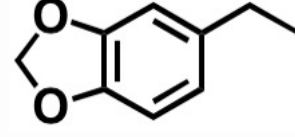

12

Faculty Rajanbabul63

7.263  
6.740  
6.727  
6.702  
6.700  
6.654  
6.652  
6.651  
6.641  
6.639  
6.638  
5.917

2.594  
2.581  
2.569  
2.556

1.542  
1.216  
1.204  
1.191

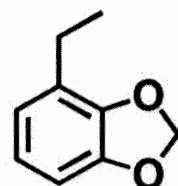

12

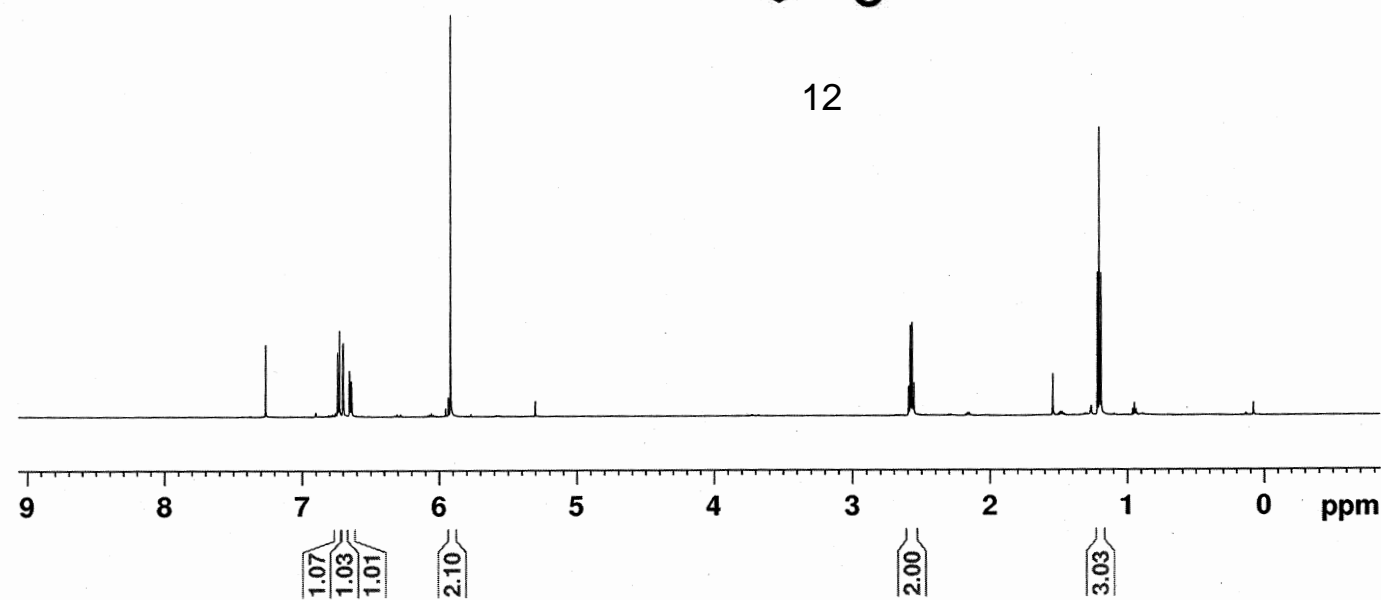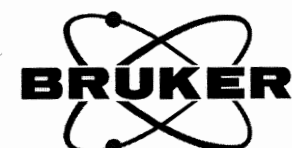

Current Parameters  
NAME BR-07-24  
EXPNO 1  
PROCNO 1

F2 - Acquisition Parameters  
Date\_ 20150521  
Time 23.32  
INSTRUM spect  
PROBHD 5 mm PABBO BB/  
PULPROG zg30  
TD 96152  
SOLVENT CDC13  
NS 64  
DS 2  
SWH 12019.230 Hz  
FIDRES 0.125002 Hz  
AQ 3.9999232 sec  
RG 120.04  
DW 41.600 usec  
DE 6.50 usec  
TE 300.2 K  
D1 1.00000000 sec  
TD0 1

===== CHANNEL f1 =====  
SF01 600.0478245 MHz  
NUC1 1H  
P1 10.00 usec  
PLW1 25.10000038 W

F2 - Processing parameters  
SI 65536  
SF 600.0450121 MHz  
WDW EM  
SSB 0  
LB 0.30 Hz  
GB 0  
PC 1.00

Faculty Rajanbabu163

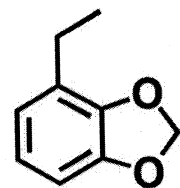

12

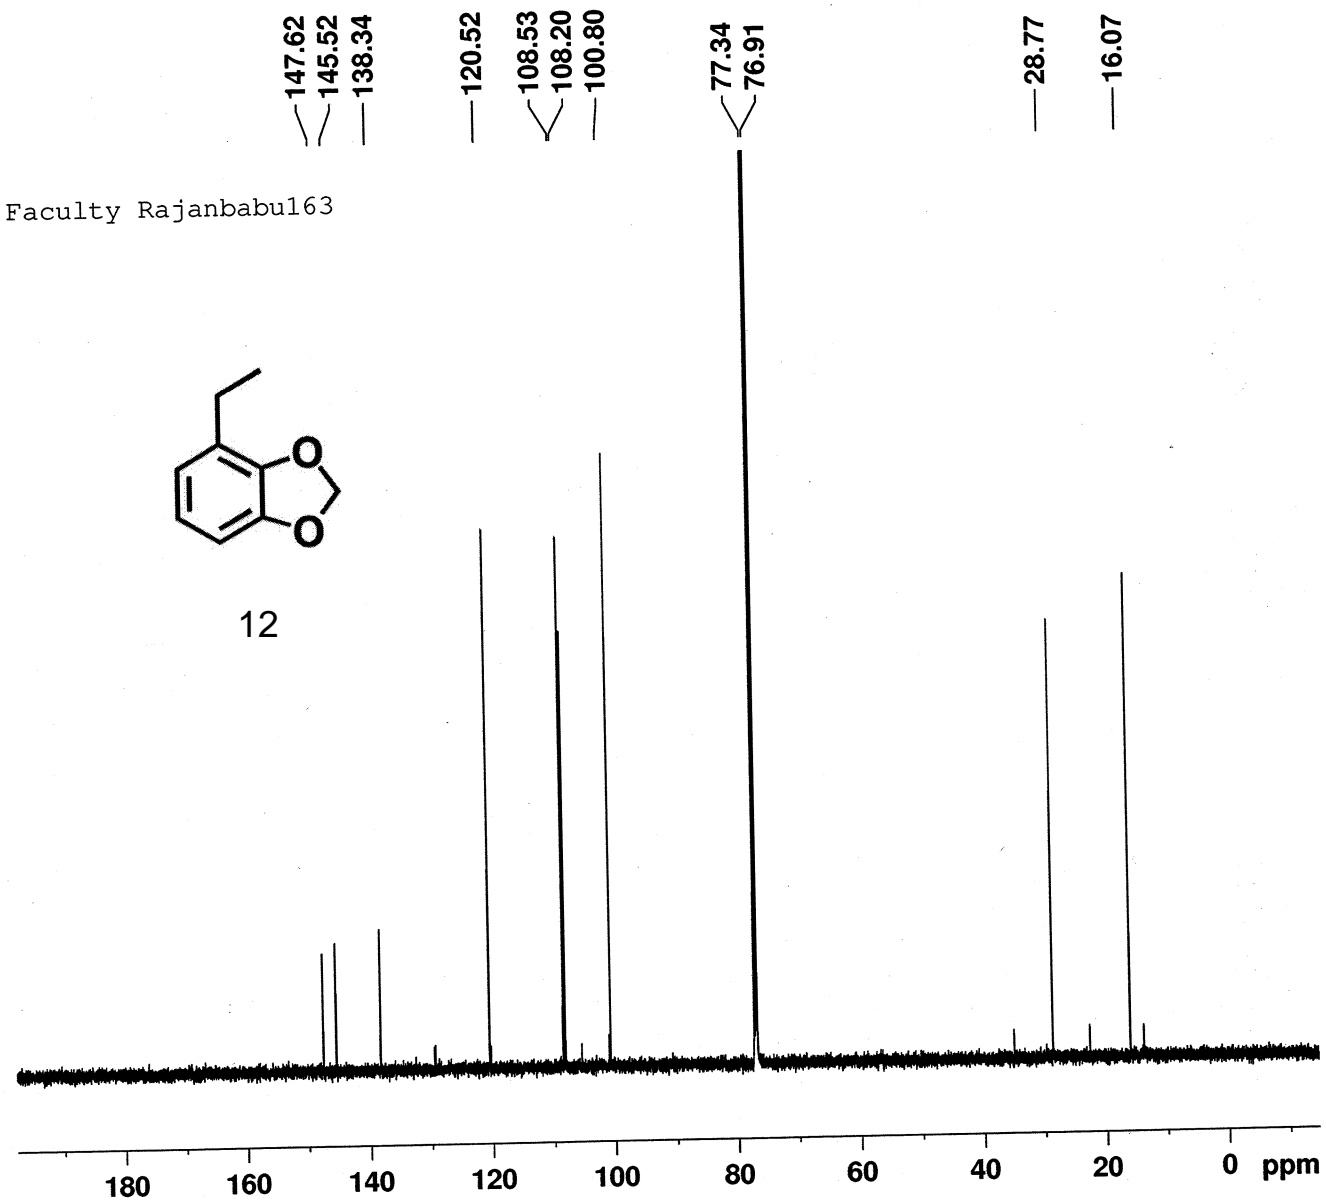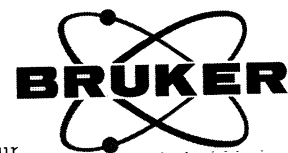

Cur  
NAME BR-07-24  
EXPNO 2  
PROCNO 1

F2 - Acquisition Parameters  
Date\_ 20150522  
Time 0.24  
INSTRUM spect  
PROBHD 5 mm PABBO BB/  
PULPROG zgpg30  
TD 65536  
SOLVENT CDCl3  
NS 1024  
DS 4  
SWH 36057.691 Hz  
FIDRES 0.550197 Hz  
AQ 0.9087659 sec  
RG 189.17  
DW 13.867 usec  
DE 6.50 usec  
TE 300.2 K  
D1 2.00000000 sec  
D11 0.03000000 sec  
TD0 1

==== CHANNEL f1 =====  
SFO1 150.8965227 MHz  
NUC1 13C  
P1 12.00 usec  
PLW1 78.16000366 W

==== CHANNEL f2 =====  
SFO2 600.0474002 MHz  
NUC2 1H  
CPDPRG[2] waltz16  
PCPD2 80.00 usec  
PLW2 28.00000000 W  
PLW12 0.43750000 W  
PLW13 0.28000000 W

F2 - Processing parameters  
SI 32768  
SF 150.8814185 MHz  
WDW EM  
SSB 0  
LB 1.00 Hz  
GB 0  
PC 1.40



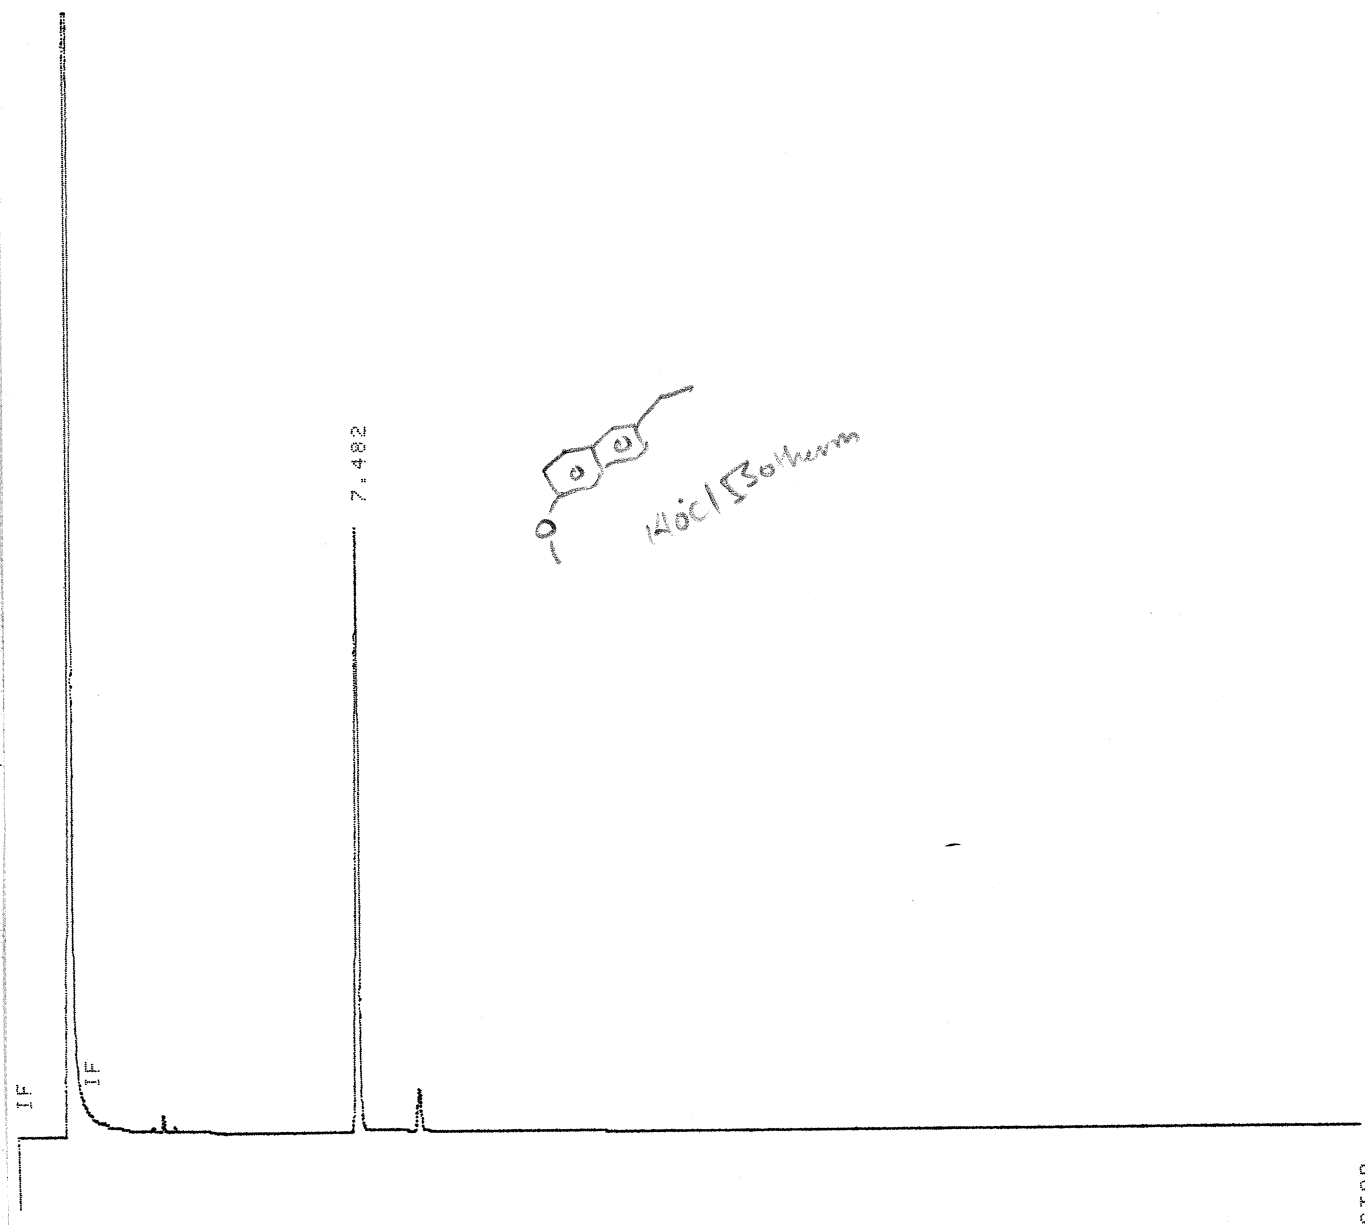

BR-07-249  
140°C Isotherm

STOP  
Error storing signal to M:SIGNAL .BNA  
DIRECTORY FULL  
Storing processed peaks to M:SIGNAL .PRA  
RUN# 2235 SEP 30 1991 15:32:33  
PEAK FILE : M:SIGNAL.PRA  
AREA% RT AREA TYPE WIDTH AREA  
7.482 1363001 PB .082 100.00000  
TOTAL AREA=1363001  
MUL FACTOR=1.0000E+00

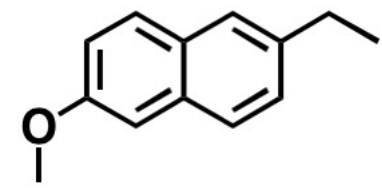

13

File : D:\MSDCHEMData\Babu\Balaram\BR-07-249.D  
Operator : BALARAM  
Acquired : 17 Sep 2015 11:15 using AcqMethod 140-Isotherm.M  
Instrument : GCMS  
Sample Name: BR-07-249  
Misc Info :  
Vial Number: 1

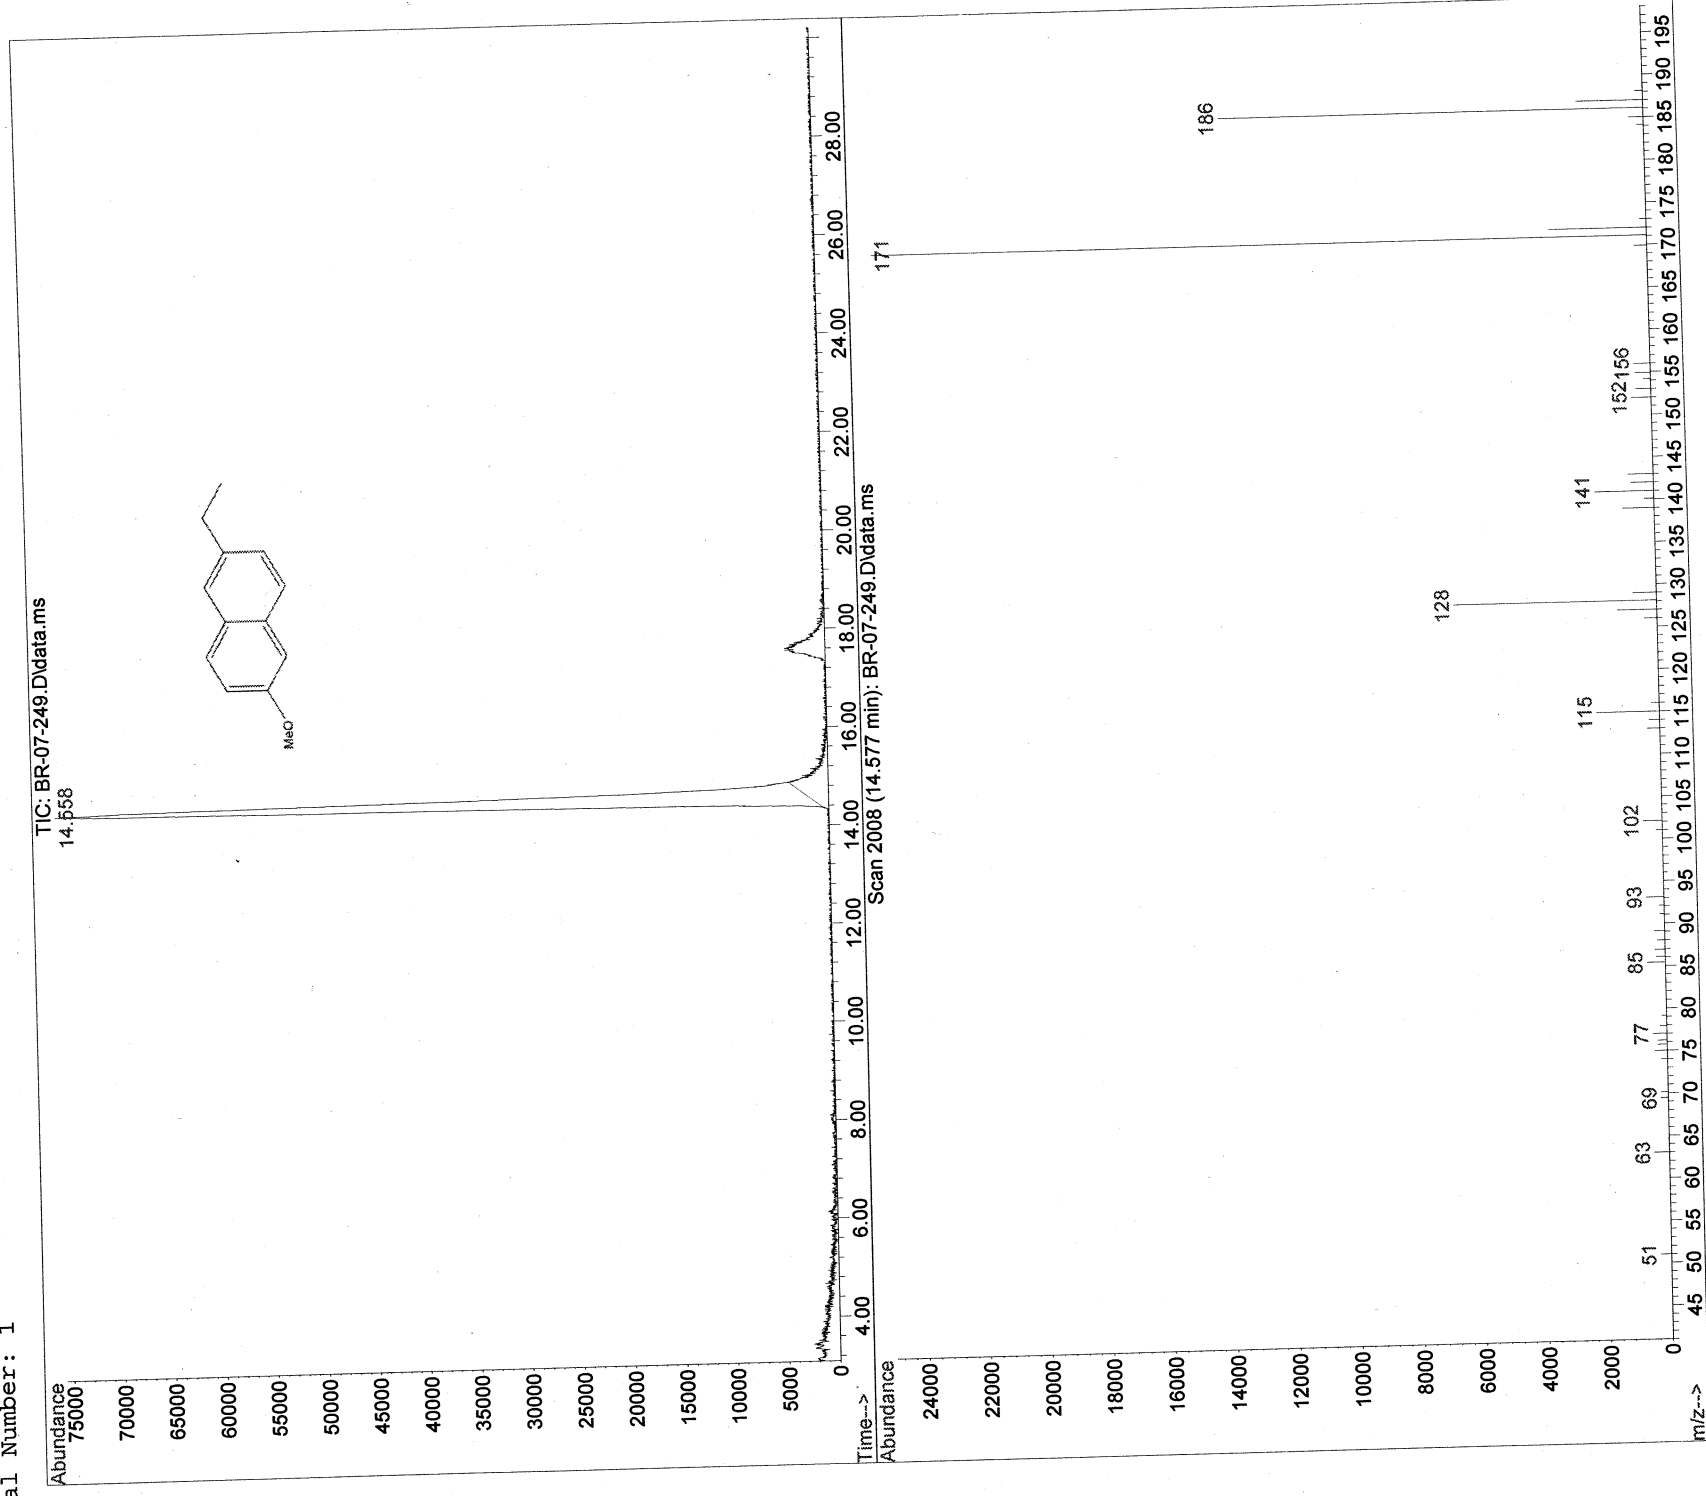

\*\*\*Division: FULL  
Storing processed peaks to M SIGNAL .PRA

RUN# 2035 SEP 6, 1981 16:55:52

PEAK FILE : M:SIGNAL.PRA

| AREA% | RT       | AREA | TYPE | WIDTH     | AREA% |
|-------|----------|------|------|-----------|-------|
| 7.850 | 17843888 | PB   | .189 | 100.00000 |       |

TOTAL AREA=1.7844E+07  
MUL FACTOR=1.0000E+00

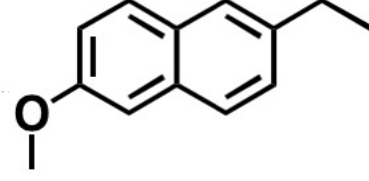

13

\* BREAK  
\* BREAK  
\* BREAK  
\* BREAK

\*AN  
RUN # 2035 SEP 6, 1901 16:55:52  
START

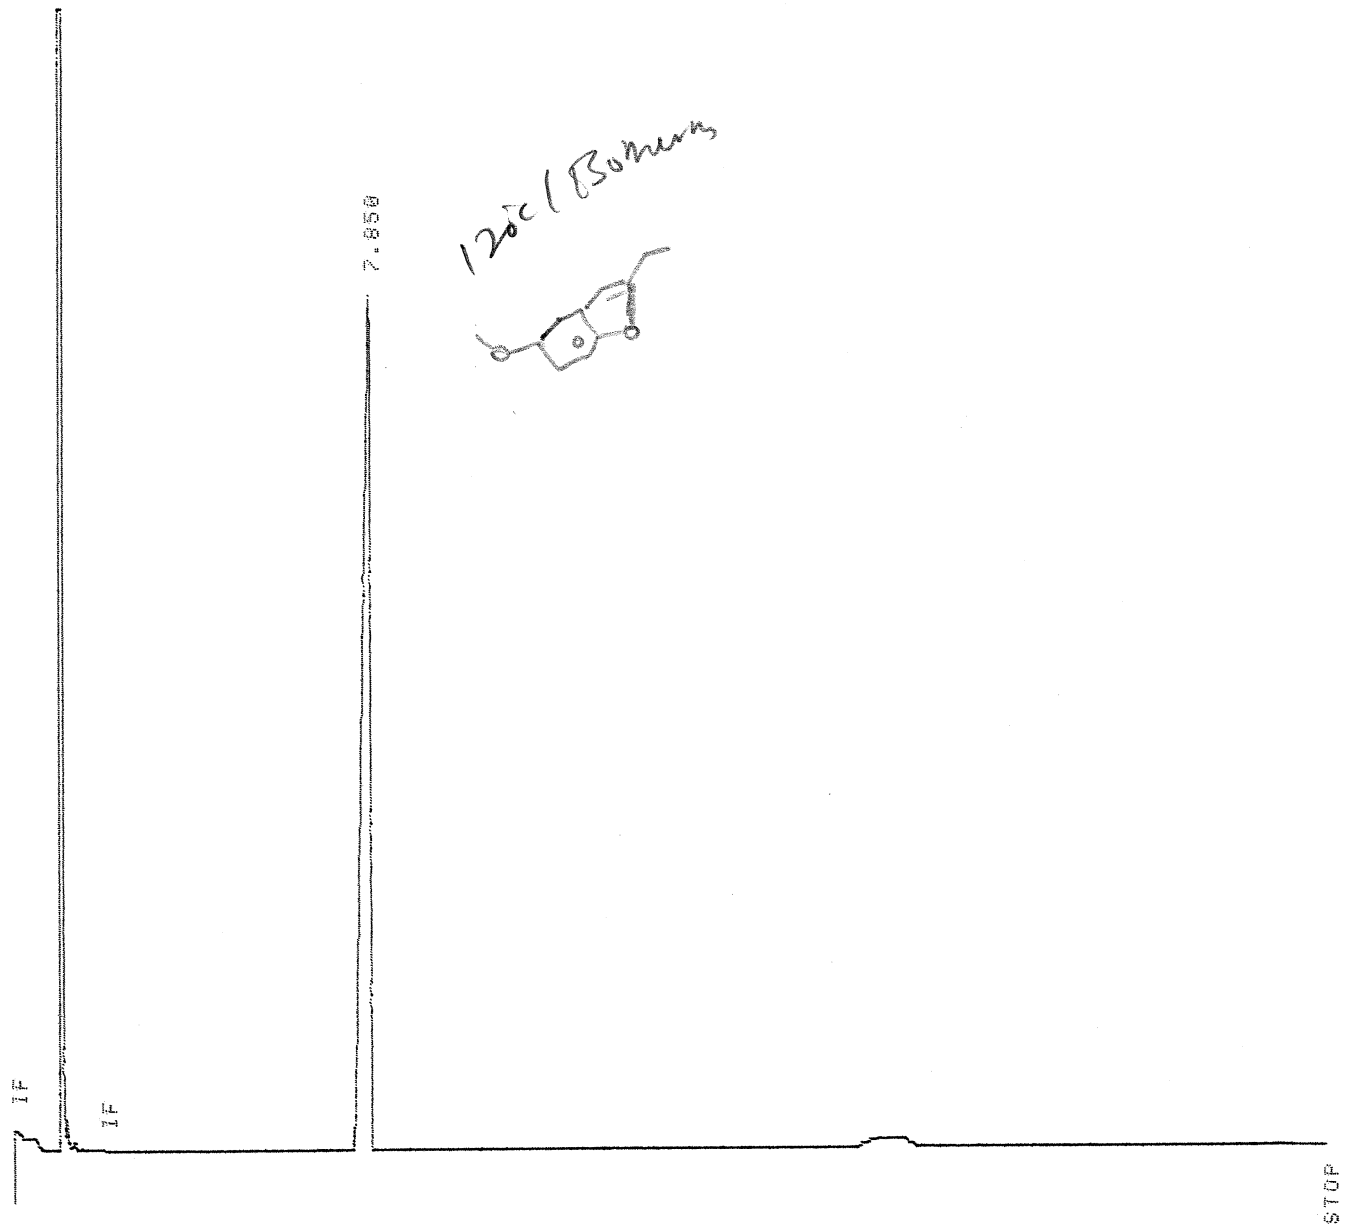

BR-07-231  
120c / Isotherm

STOP

Error storing signal to M:SIGNAL .BNA  
DIRECTORY FULL  
Storing processed peaks to M:SIGNAL .PRA

RUN# 2035 SEP 6, 1901 16:55:52

PEAK FILE : M:SIGNAL.PRA

| AREA# | RT    | AREA     | TYPE | WIDTH | AREA#     |
|-------|-------|----------|------|-------|-----------|
| 1     | 7.850 | 17843888 | PB   | .189  | 100.00000 |

TOTAL AREA=1.7844E+07  
MUL FACTOR=1.0000E+00

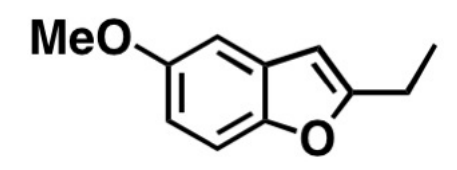

File :D:\MSDCHEMData\Babu\Balararam\BR-07-231.D  
Operator : BALARAM  
Acquired : 29 Aug 2015 14:56 using AcqMethod 120-ISOTHERM.M  
Instrument : GCMS  
Sample Name : BR-07-231  
Misc Info :  
Vial Number: 1

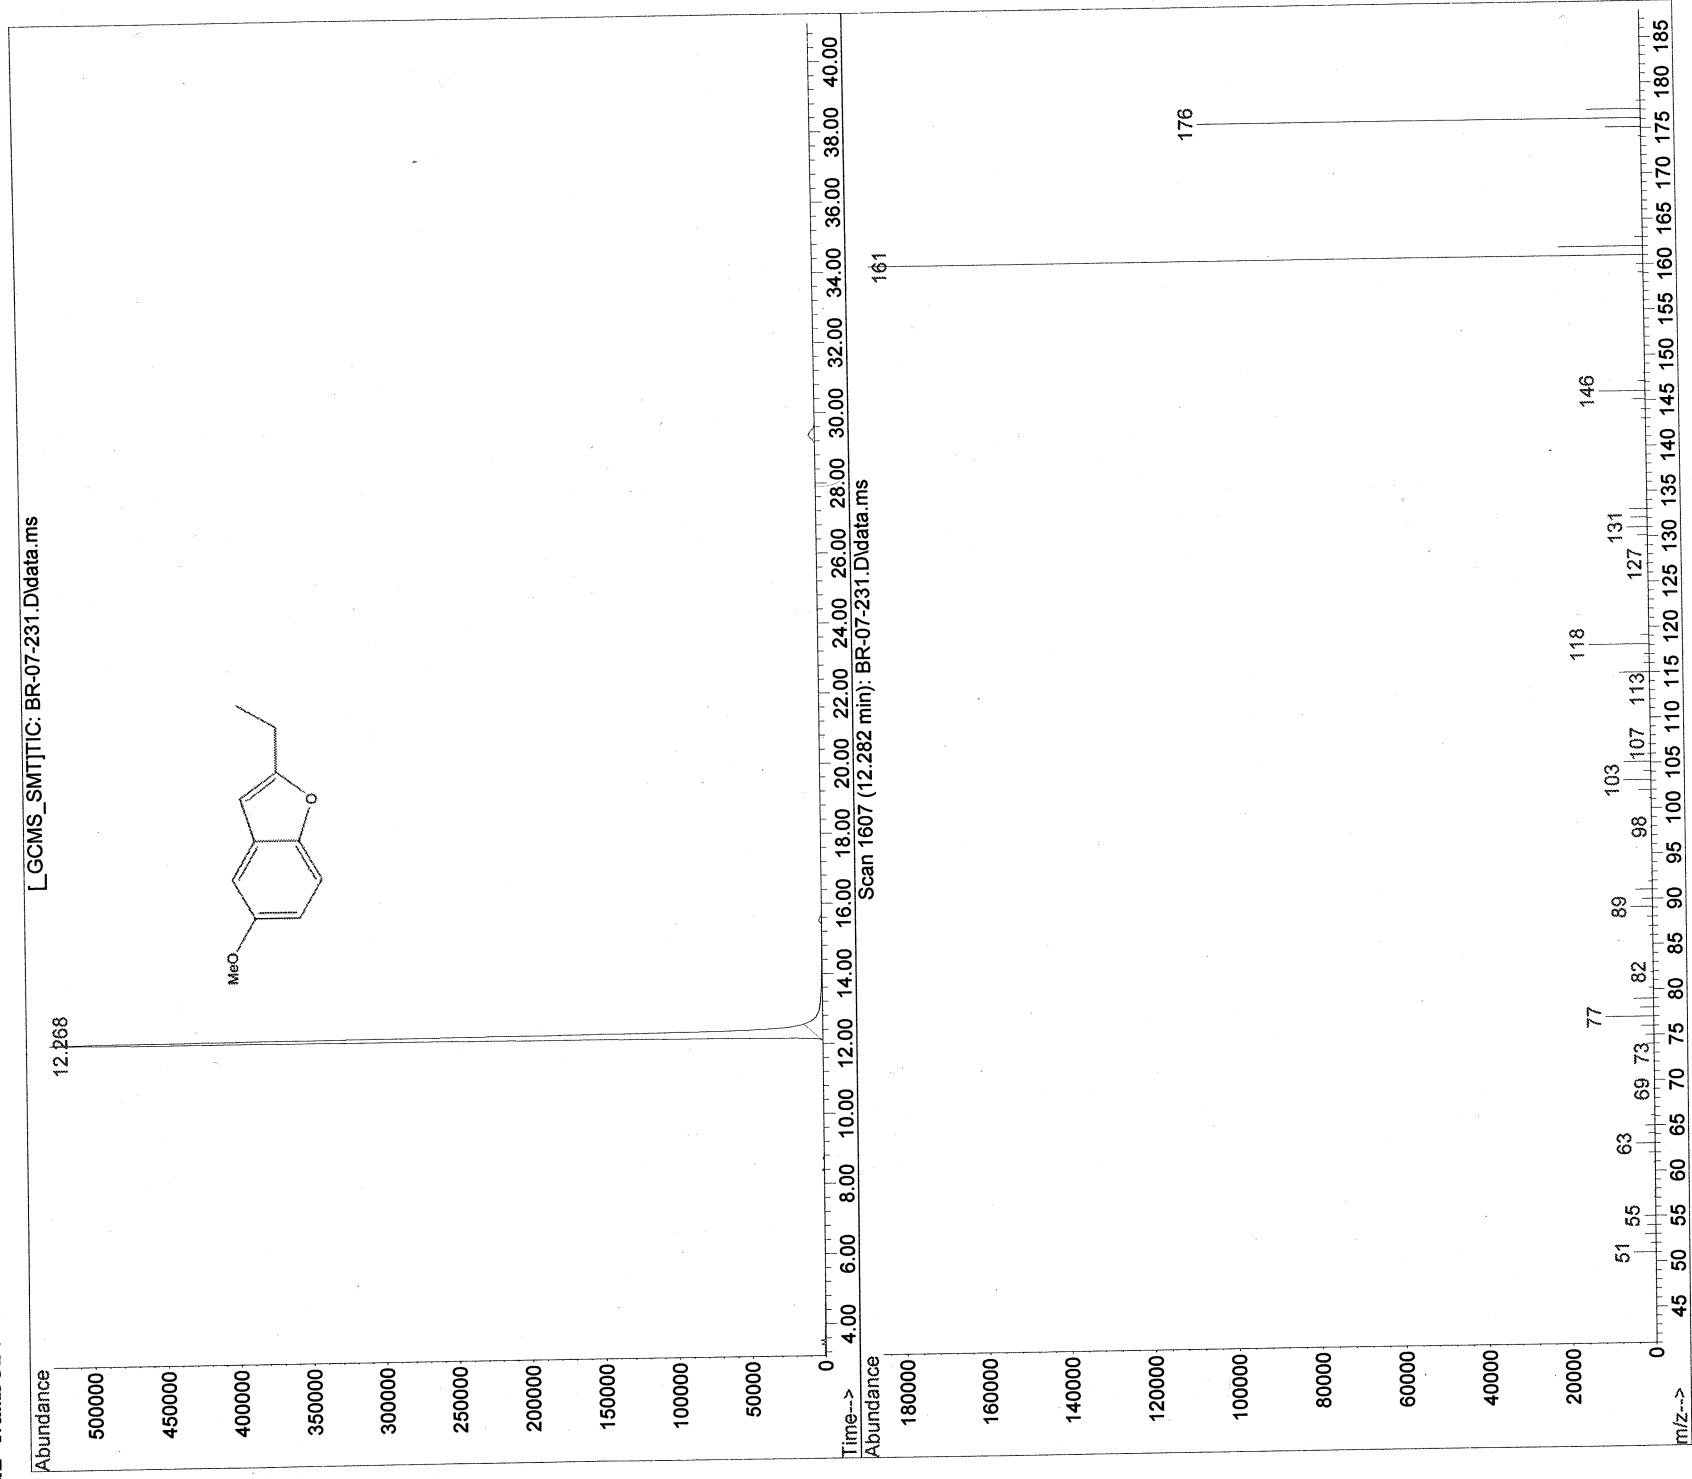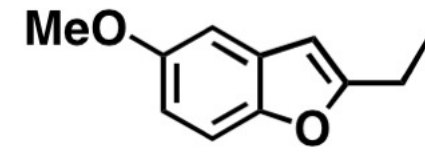

BR-09-23

70°C Isotherm

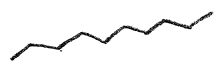

Decane

FIGURE 3: n-Decane [Reduction of 1-decene (crude product)]

RUN # 2084 JUL 10, 1901 19:48:14  
START

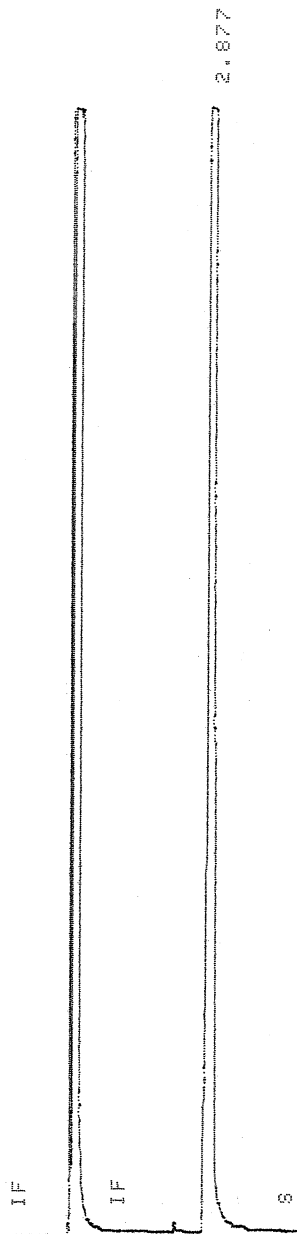

END OF SIGNAL

Closing signal file M:SIGNAL .BNA

RUN# 2084 JUL 10, 1901 19:48:14

SIGNAL FILE: M:SIGNAL.BNA  
AREA%

| RT    | AREA     | TYPE | WIDTH | AREA%     |
|-------|----------|------|-------|-----------|
| 2.877 | 49423648 | SPB  | .106  | 100.00000 |

TOTAL AREA=4.9424E+07  
MUL FACTOR=1.0000E+00

BR-09-22  
60°C (Isotherm)  
CCCCBr

1.817

FIGURE 3: Reduction product of 4-bromobutene (crude product)

\* RUN # 2076 JUL 10, 1901 00:05:56

START

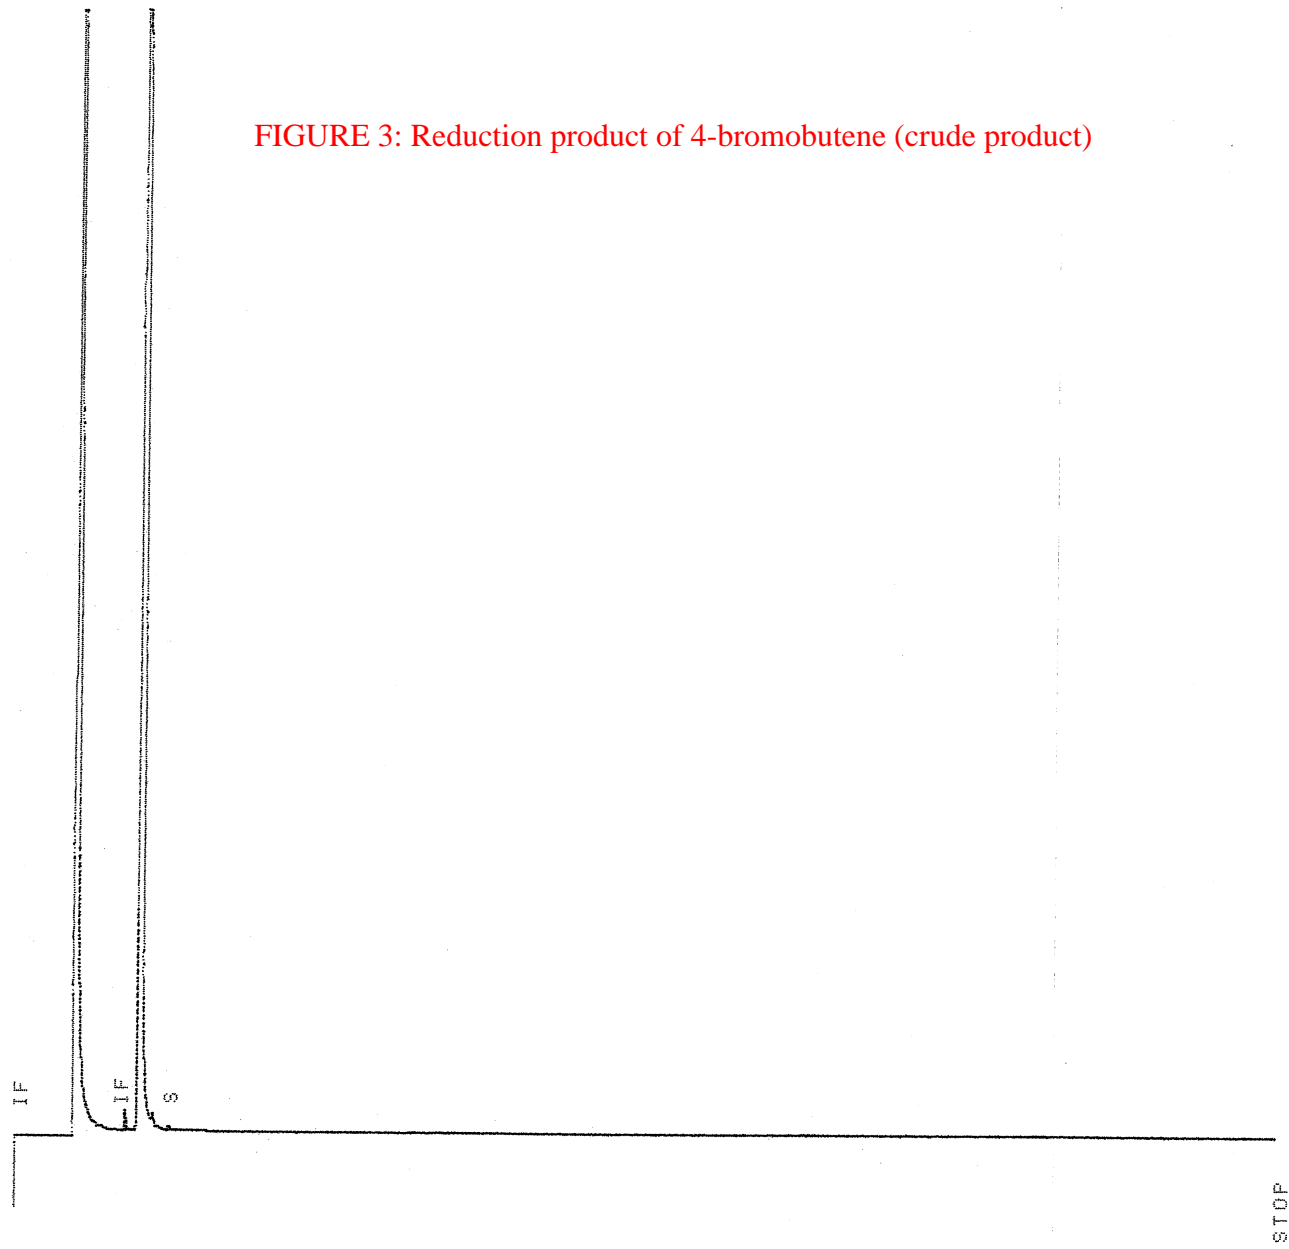

STOP

Closing signal file M:SIGNAL .BNC

RUN# 2076 JUL 10, 1901 00:05:56

SIGNAL FILE: M:SIGNAL.BNC

| AREA% | RT    | AREA     | TYPE | WIDTH | AREA%     |
|-------|-------|----------|------|-------|-----------|
|       | 1.817 | 30931072 | SPB  | .066  | 100.00000 |

TOTAL AREA=3.0931E+07  
MUL FACTOR=1.0000E+00

RUN # 2083  
START

JUL 10, 1901 19:06:36

IF

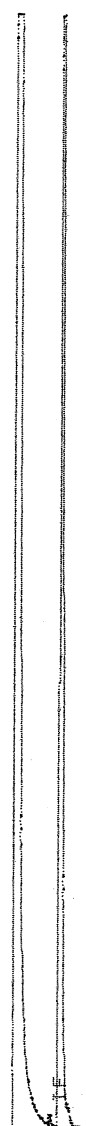

1.559

FIGURE 3: Reduction product of 3-butene-1-ol (crude product)

BR-09-25  
CCC(O)C  
40% 1 Butanol

END OF SIGNAL

Closing signal file M:SIGNAL .BNA

RUN# 2083 JUL 10, 1901 19:06:36

SIGNAL FILE: M:SIGNAL.BNA  
AREA:

| RT    | AREA     | TYPE | WIDTH | AREA%     |
|-------|----------|------|-------|-----------|
| 1.559 | 17432368 | SBB  | .039  | 100.00000 |

BR-09-29

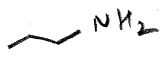

35°C / Iso therm

2.222

FIGURE 3: Reduction product of allyl amine (crude product)

BREAK

\*AN  
RUN # 2110 JUL 12, 1901 22:45:30  
START

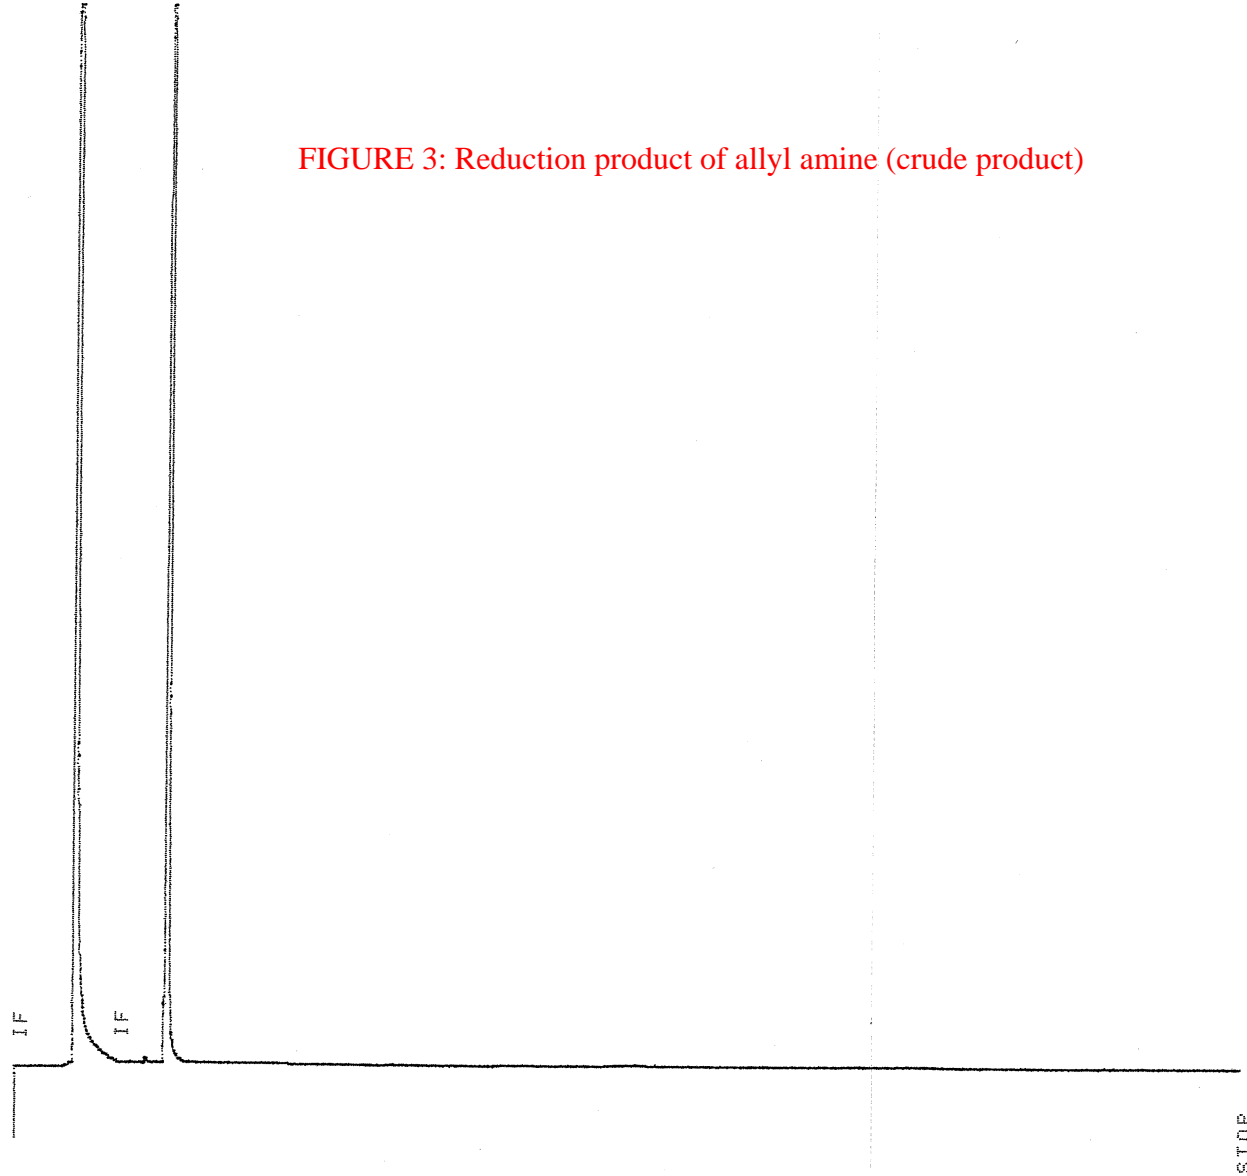

STOP

Closing signal file M:SIGNAL.BNA

RUN# 2110 JUL 12, 1901 22:45:30

SIGNAL FILE: M:SIGNAL.BNA

| AREA% | RT    | AREA     | TYPE | WIDTH | AREA%     |
|-------|-------|----------|------|-------|-----------|
|       | 2.222 | 27854864 | SPB  | .060  | 100.00000 |

TOTAL AREA=2.7855E+07  
MUL FACTOR=1.0000E+00



BR-09-50

100cl Bottoms

FIGURE 3: Reduction product of cis- and trans- 4-vinyl-1,2-epoxycyclohexane (crude product)

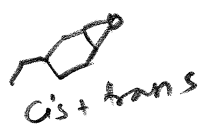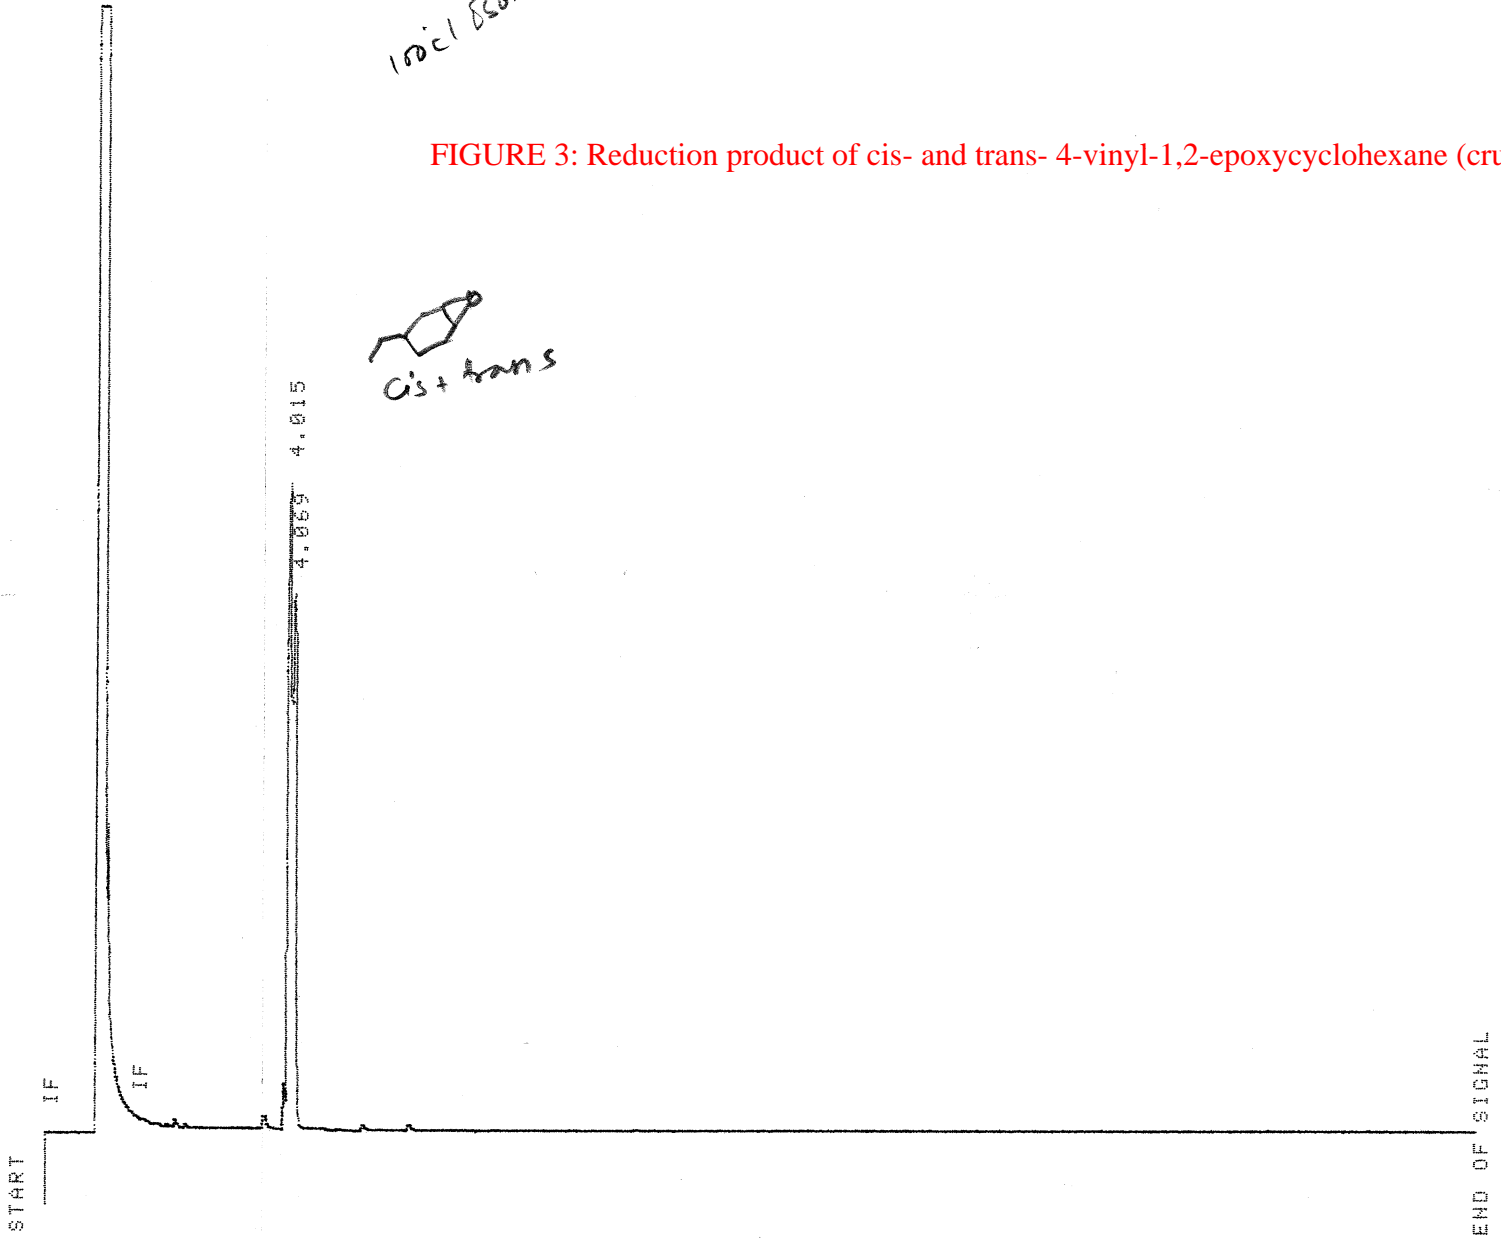

Closing signal file M:SIGNAL .BNA  
RUN# 2165 JUL 19, 1901-19:44:14  
SIGNAL FILE: M:SIGNAL.BNA  
AREA%  

| RT    | AREA    | TYPE | WIDTH | AREA%    |
|-------|---------|------|-------|----------|
| 4.015 | 3875094 | VV   | .055  | 58.98882 |
| 4.069 | 2694328 | VB   | .046  | 41.01317 |

  
TOTAL AREA=6569421  
MUL FACTOR=1.0000E+00

\*  
BREAK

\*  
BREAK

\*  
BREAK

\*AN  
RUN # 2882 SEP 11, 1901 19:26:18  
START

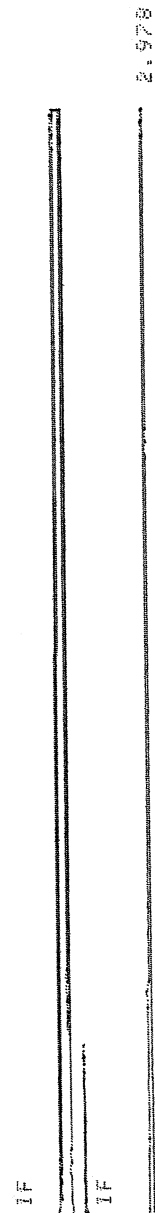

*C<sub>5</sub>H<sub>11</sub>*  
*50°C / Bohm*

BR-07-229  
50°C / Bohm

STOP

Error storing signal to M:SIGNAL .BNA  
DIRECTORY FULL  
Storing processed peaks to M:SIGNAL .PRA

RUN# 2882 SEP 11, 1901 19:26:18

PEAK FILE : M:SIGNAL.PRA

| AREA# | RT    | AREA     | TYPE | WIDTH | AREA%     |
|-------|-------|----------|------|-------|-----------|
| 1     | 2.978 | 18648848 | SBB  | .047  | 100.00000 |

TOTAL AREA=1.8649E+07  
MUL FACTOR=1.0000E+00

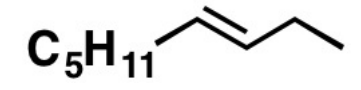

27b

File :D:\MSDCHEMData\Babu\Balaram\BR-07-229-3.D  
Operator : BALARAM  
Acquired : 31 Aug 2015 13:27 using AcqMethod 50-ISOTHERM.M  
Instrument : GCMS  
Sample Name: BR-07-229-3  
Misc Info :  
Vial Number: 1

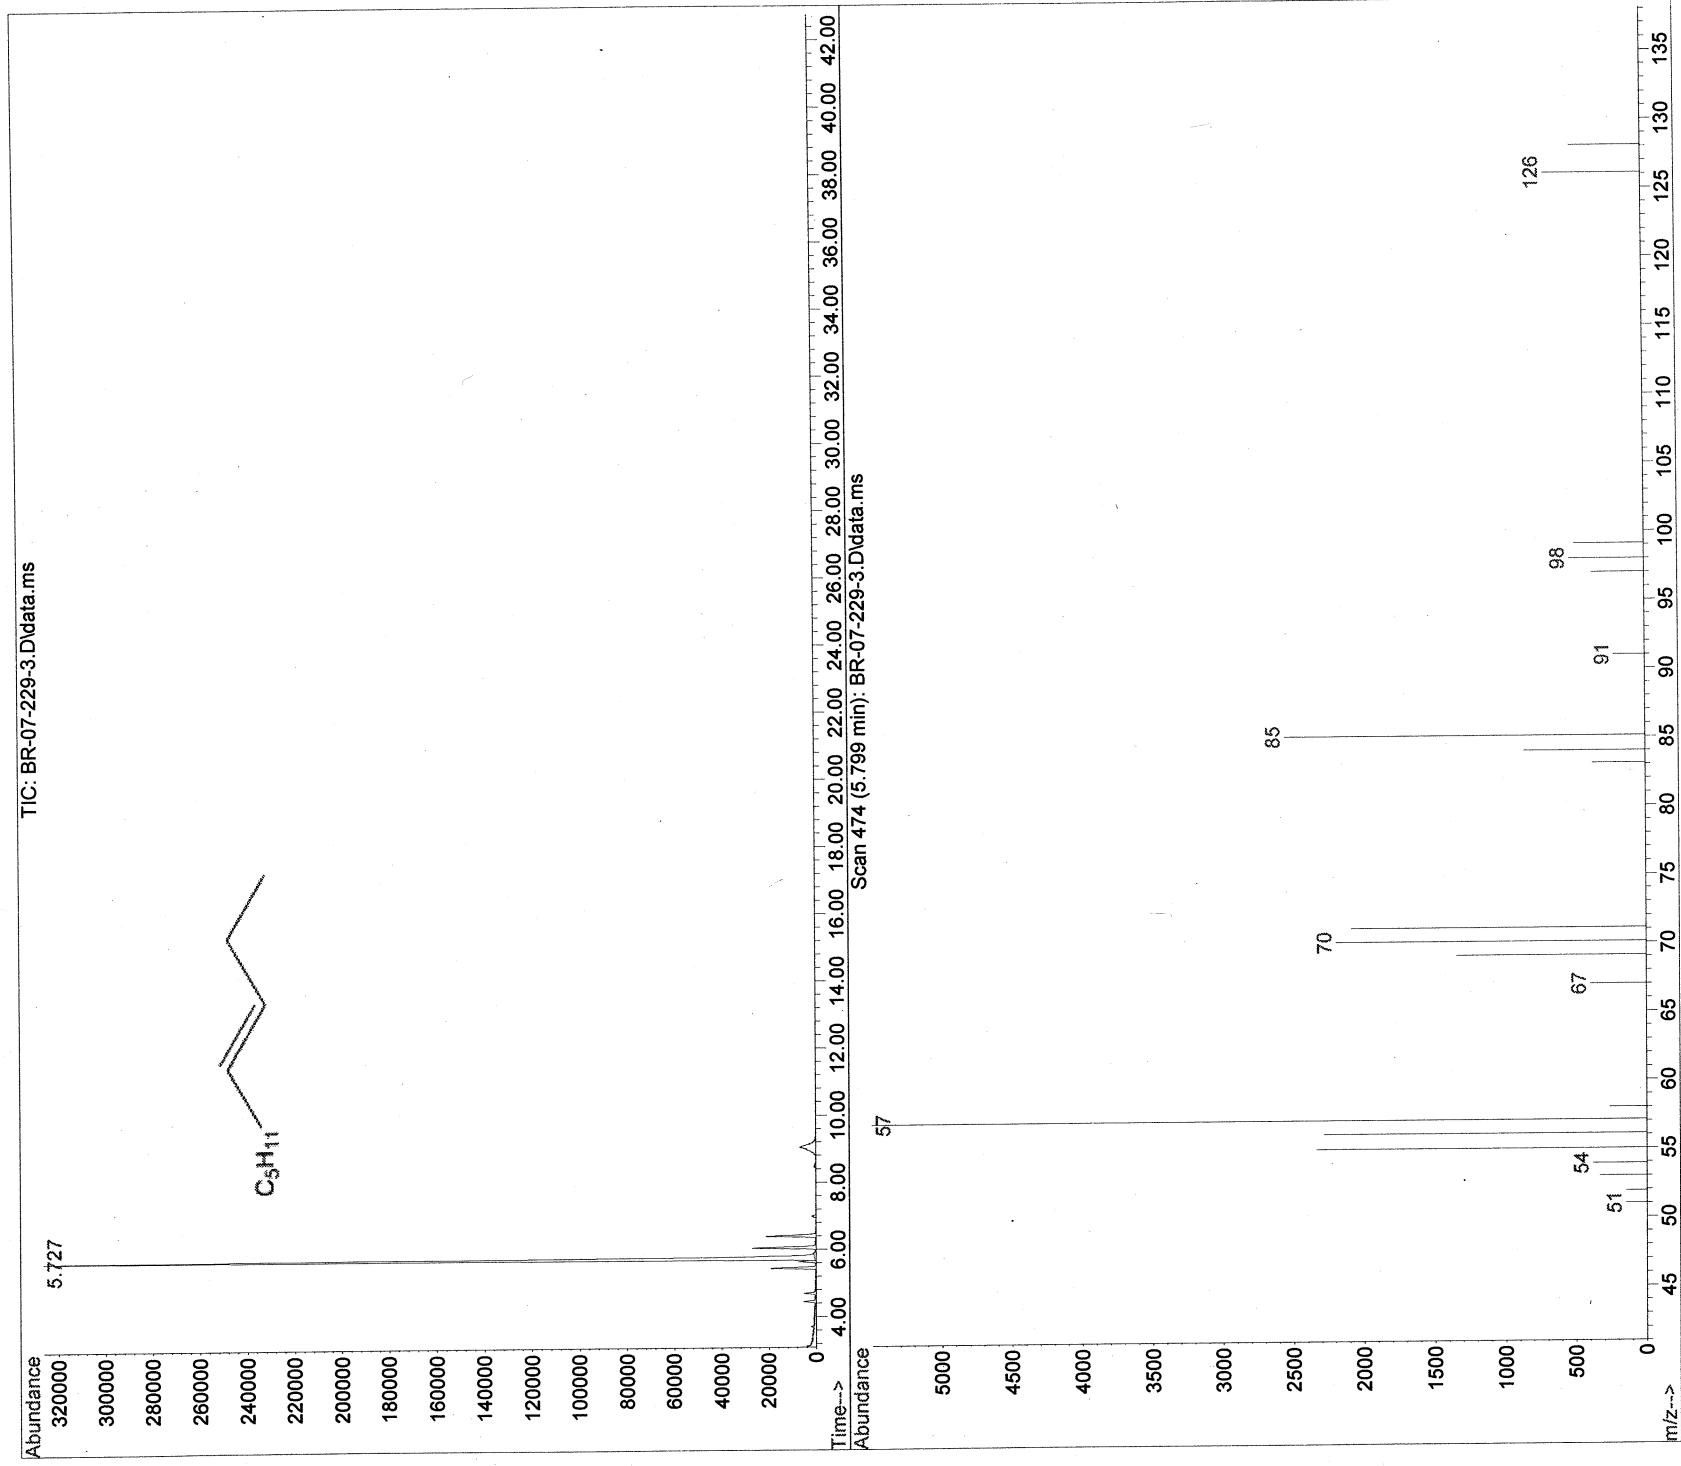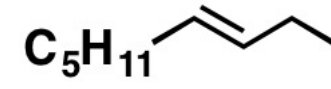

27b

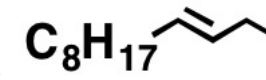

27a

BR-07-218  
100°C / 130 min

\* BREAK  
\* BREAK  
\* BREAK  
\* BREAK  
\* BREAK

\*AN  
RUN # 2017 SEP 5, 1901 14:23:29  
START

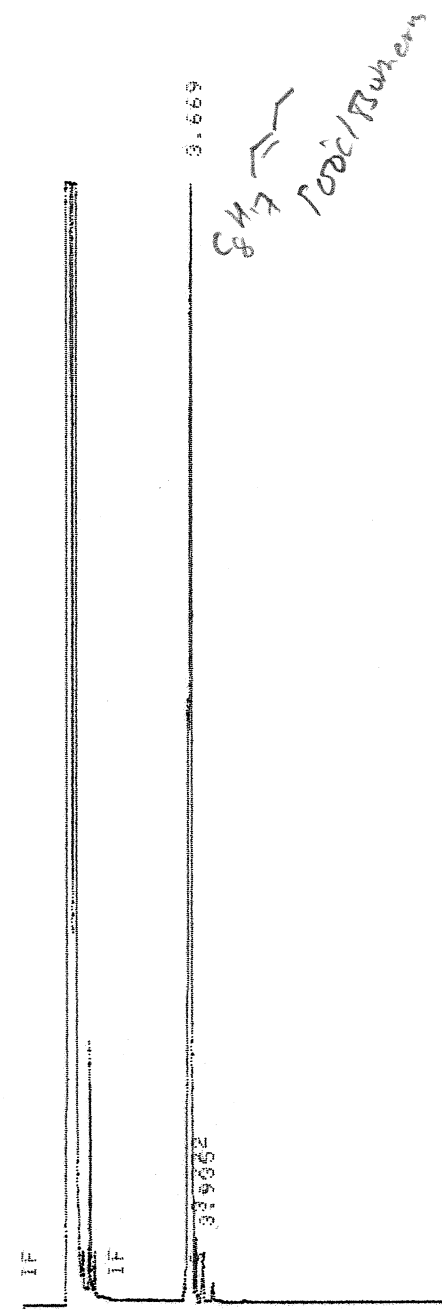

END OF SIGNAL

Error storing signal to M:SIGNAL .BNA  
DIRECTORY FULL  
Storing processed peaks to M:SIGNAL .PRA

RUN# 2017 SEP 5, 1901 14:23:29

PEAK FILE : M:SIGNAL.PRA

| AREA% | RT    | AREA     | TYPE | WIDTH | AREA%    |
|-------|-------|----------|------|-------|----------|
|       | 3.669 | 20103200 | SPB  | .079  | 95.26845 |
|       | 3.772 | 534817   | BB   | .038  | 2.53448  |
|       | 3.935 | 463615   | BB   | .041  | 2.19706  |

TOTAL AREA=2.1102E+07  
MUL FACTOR=1.0000E+00

File : D:\MSDCHEMData\Babu\Balaram\BR-07-218 RERUN.D  
Operator : BALARAM  
Acquired : 27 Aug 2015 10:58 using AcqMethod 100-ISOTHERM.M  
Instrument : GCMS  
Sample Name: BR-07-218 RERUN  
Misc Info :  
Vial Number: 1

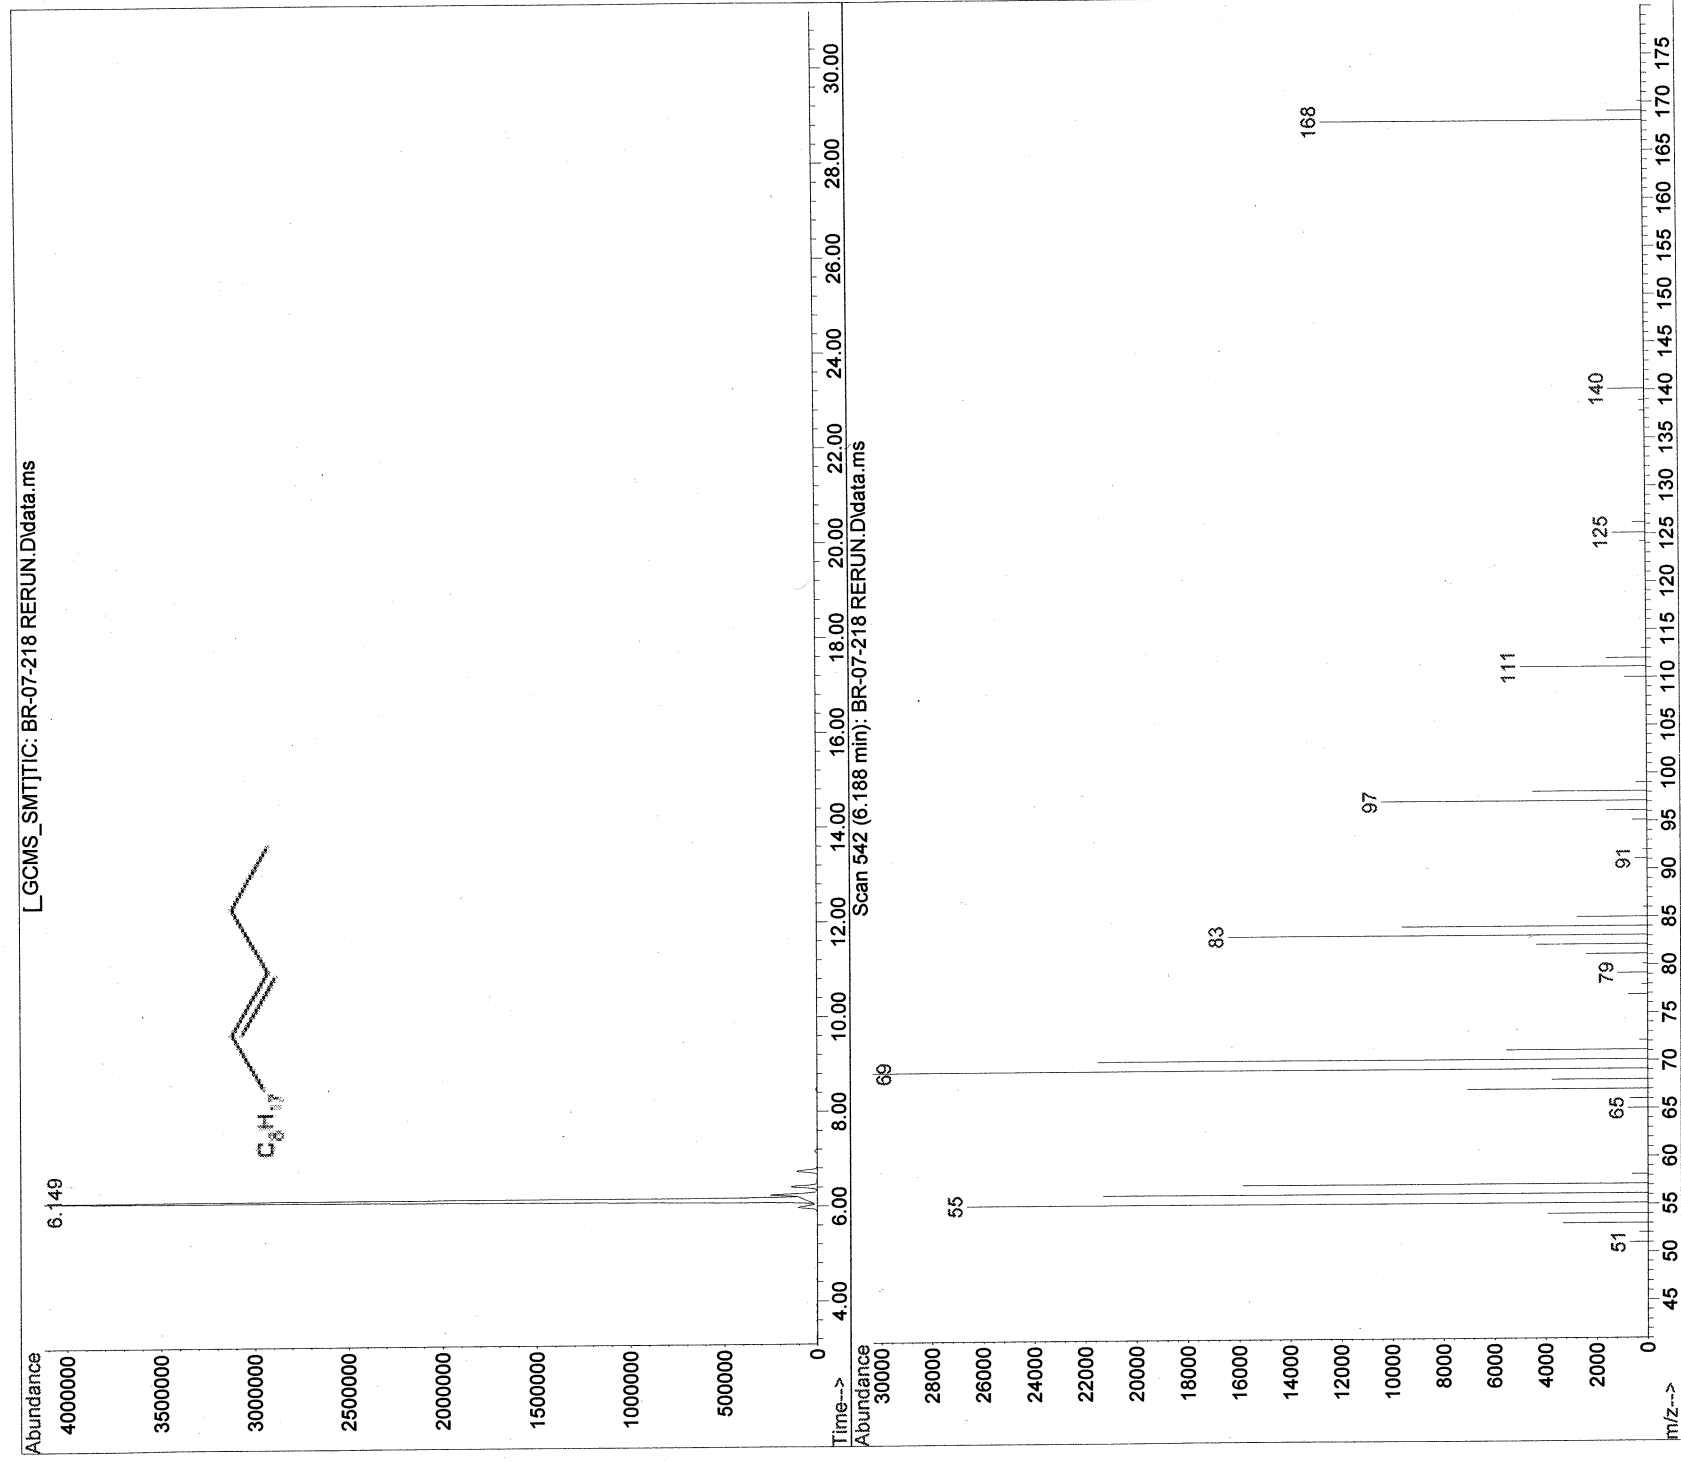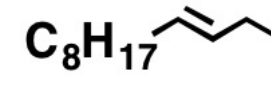

27a

\* BREAK

\*AN  
RUN # 1475 MAY 14, 1901 23:10:54  
START

IF

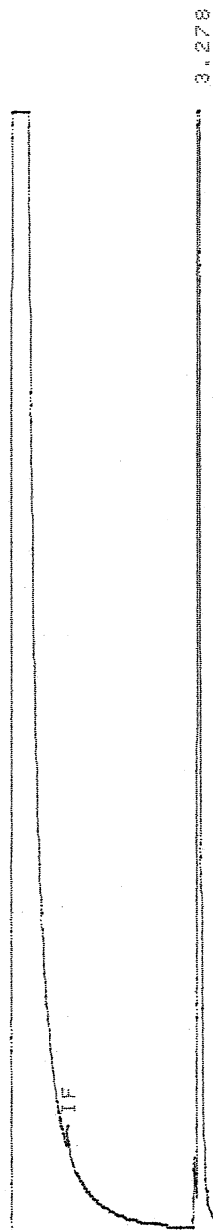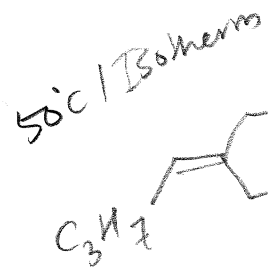

BR-07-230  
50°C Isotherms

END OF SIGNAL

Closing signal file M:SIGNAL .BNA

RUN# 1475 MAY 14, 1901 23:10:54

SIGNAL FILE: M:SIGNAL.BNA  
AREA# RT AREA TYPE WIDTH AREA%

3.278 2445093 SPB .035 100.00000

TOTAL AREA=2445093  
MUL FACTOR=1.00000E+00

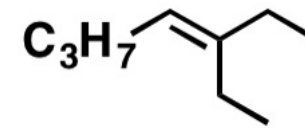

29

BR-09-24

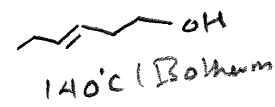

3.992

EQUATION 3b: Reduction product of (E)-1-hydroxy-3,5-diene (crude product)

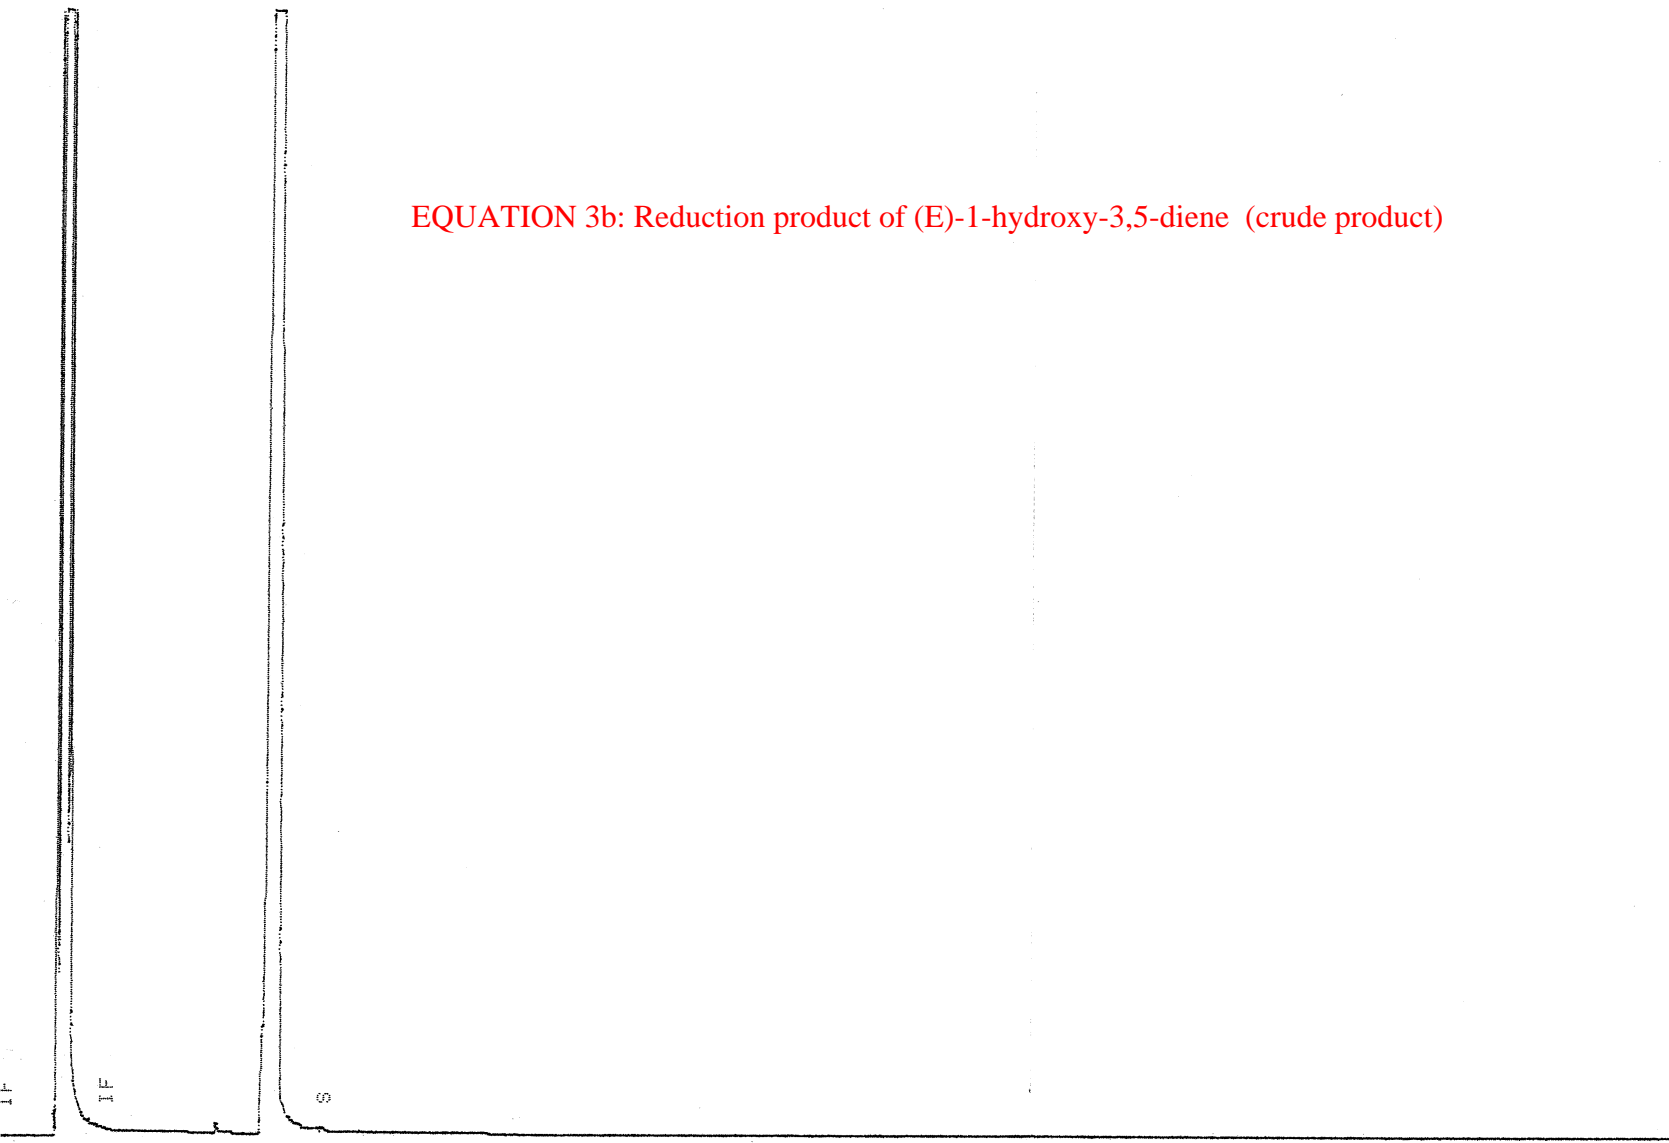

STOP

Closing signal file M:SIGNAL .BNA  
RUN# 2085 JUL 10, 1901 20:21:05  
SIGNAL FILE: M:SIGNAL.BNA  
AREA%  
RT AREA TYPE WIDTH AREA%  
3.992 79556288 SPB .171 100.00000  
TOTAL AREA=7.9556E+07  
MUL FACTOR=1.0000E+00

BR-09-20  
100c1 Bomen  
H2 ballon experiment  
H2 ballon

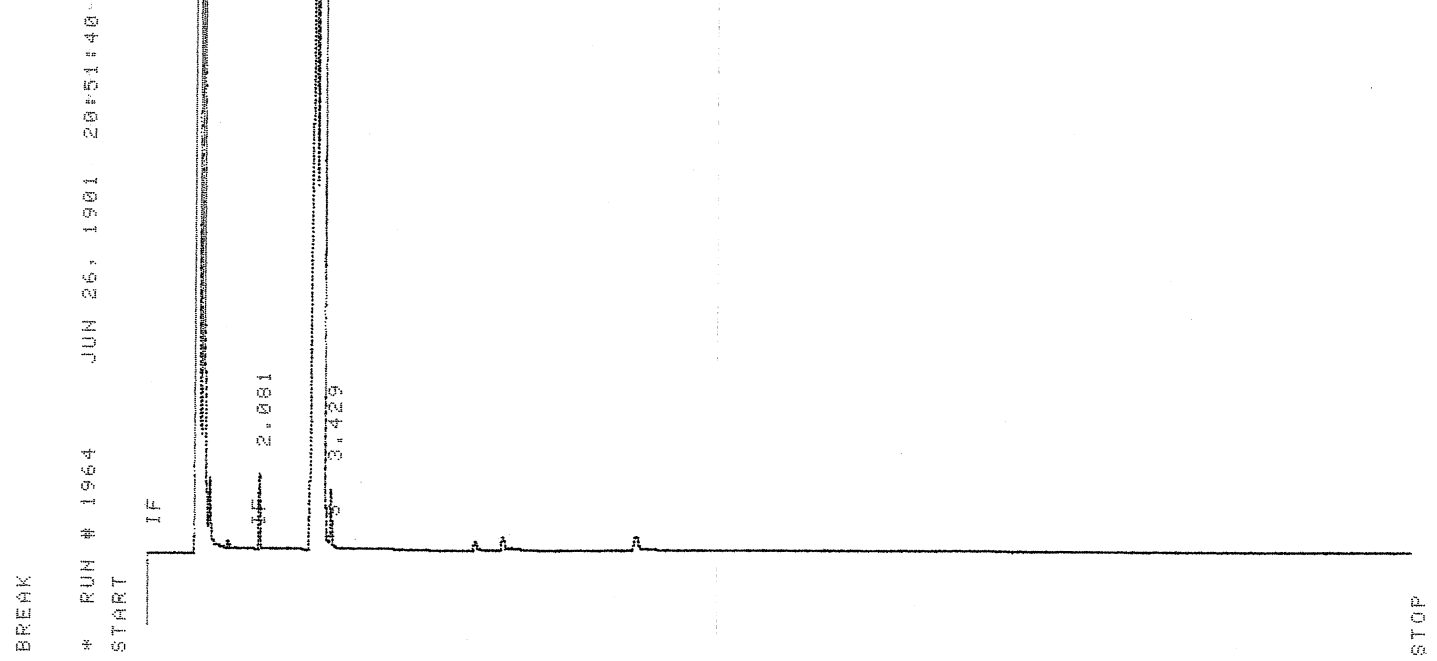

EQUATION 4: Co-Catalyzed hydrogenation (at 1 atmosphere of H<sub>2</sub>) of (E)-1,3-dodecadiene (crude product)

Closing signal file M:SIGNAL .BNC

RUN# 1964 JUN 26, 1901 20:51:40

SIGNAL FILE: M:SIGNAL.BNC

| AREA% | RT    | AREA     | TYPE | WIDTH | AREA%    |
|-------|-------|----------|------|-------|----------|
|       | 2.081 | 490831   | BB   | .028  | .72535   |
|       | 3.100 | 13456712 | SPH  | .087  | 19.88624 |
|       | 3.234 | 53351168 | SHB  | .113  | 78.84202 |
|       | 3.429 | 369763   | BB   | .028  | .54643   |

TOTAL AREA=6.7668E+07  
MUL FACTOR=1.0000E+00



BR-09-38  
100°C / Bottom  
H<sub>2</sub> (50 PSI)

9.4.

3.227

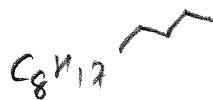

EQUATION 4: Co-Catalyzed hydrogenation (at 3.5 atmosphere of H<sub>2</sub>) of (E)-1,3-dodecadiene (crude product)

RUN # 2047 JUL 5, 1901 01:22:28  
START

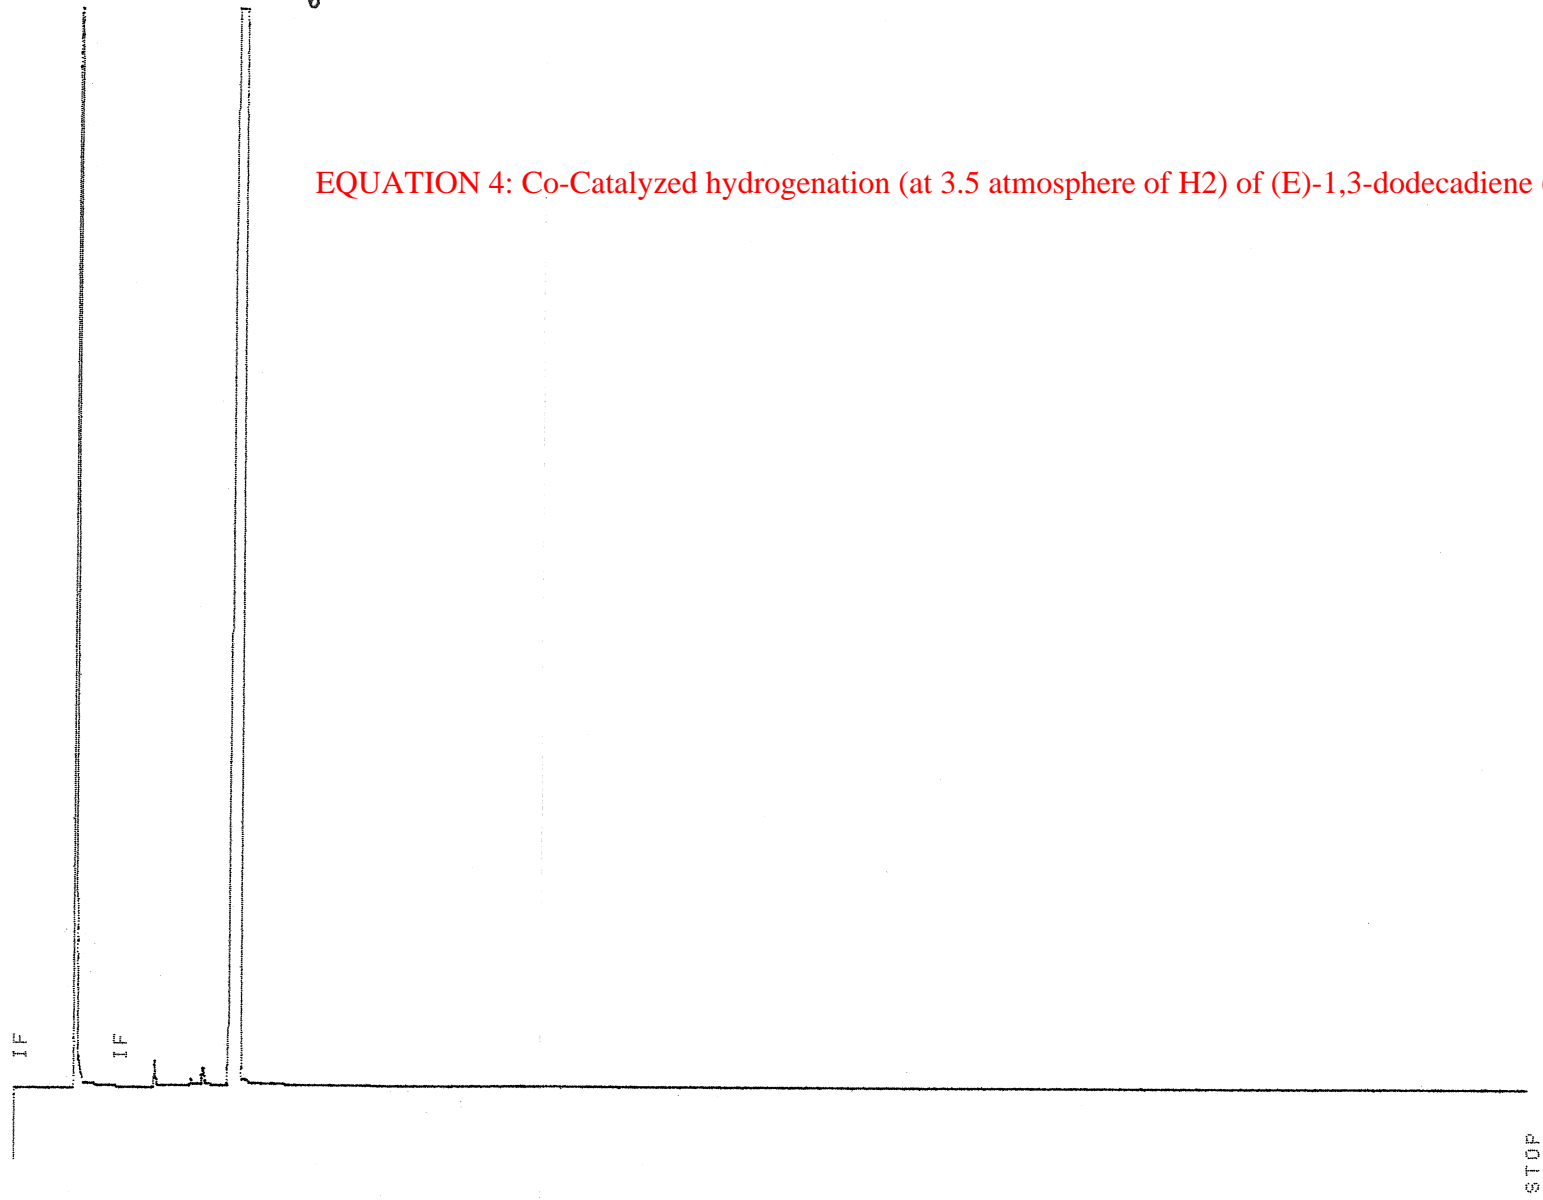

STOP

Closing signal file M:SIGNAL .BNA

RUN# 2047 JUL 5, 1901 01:22:28

SIGNAL FILE: M:SIGNAL.BNA  
AREA%

| RT    | AREA     | TYPE | WIDTH | AREA%     |
|-------|----------|------|-------|-----------|
| 3.227 | 75133504 | SBB  | .159  | 100.00000 |

TOTAL AREA=7.5134E+07  
MUL FACTOR=1.0000E+00

File : D:\MSDCHEMData\Babu\Balararam\BR-07-230.D  
Operator : BALARAM  
Acquired : 28 Aug 2015 20:15 using AcqMethod 50-ISOTHERM.M  
Instrument : GCMS  
Sample Name: BR-07-230  
Misc Info :  
Vial Number: 1

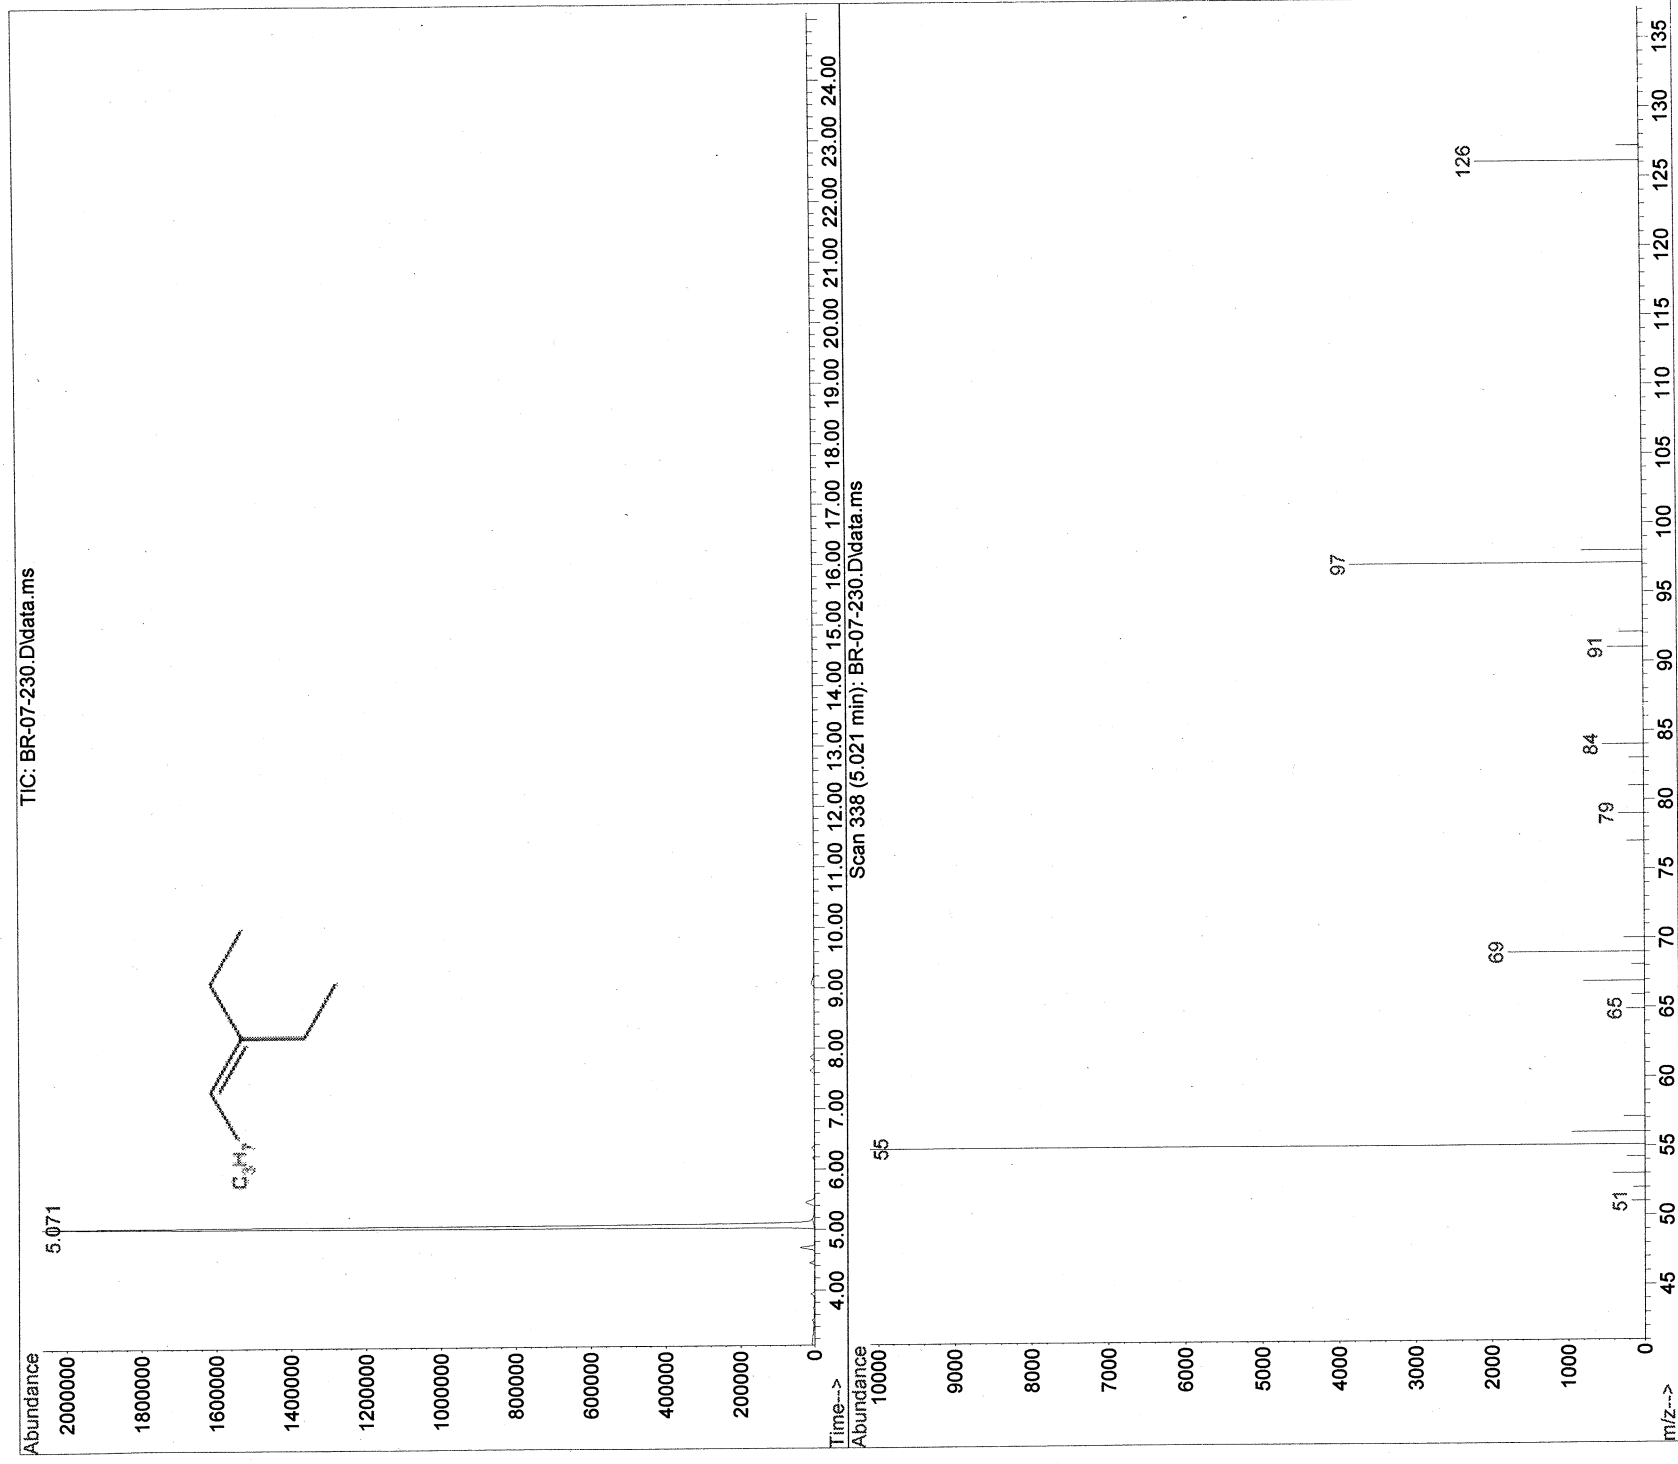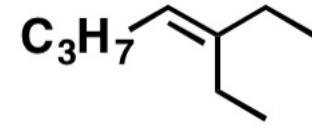

BR-07-216  
100% Isomer

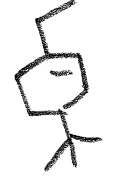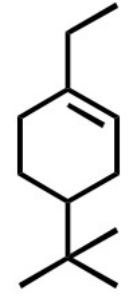

25a

\* BREAK  
\* BREAK  
\* BREAK  
\* BREAK  
\* BREAK

\*AN  
RUN # 1746 AUG 9, 1901 16:30:04  
START

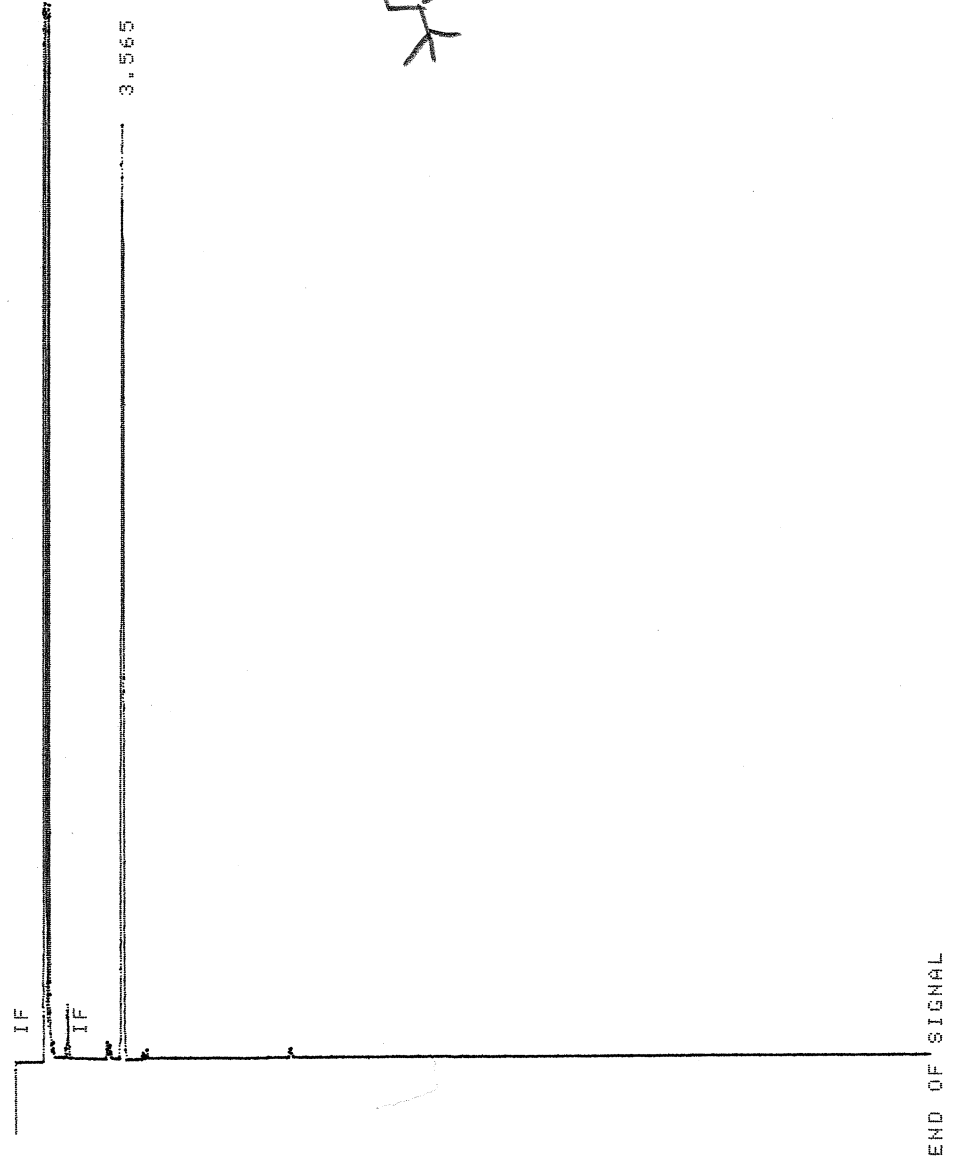

END OF SIGNAL

Error storing signal to M:SIGNAL .BNA  
DIRECTORY FULL  
Storing processed peaks to M:SIGNAL .PRA  
RUN# 1746 AUG 9, 1901 16:30:04  
PEAK FILE : M:SIGNAL.PRA  
AREA%  
RT AREA TYPE WIDTH AREA%  
3.565 29982176 SPB .064 100.00000  
TOTAL AREA=2.9982E+07  
MUL FACTOR=1.0000E+00

File : D:\MSDCHEMData\Babu\Balaram\BR-07-216 .D  
Operator : BALARAM  
Acquired : 31 Jul 2015 12:22 using AcqMethod 100-ISOTHERM.M  
Instrument : GCMS  
Sample Name : BR-07-216  
Misc Info :  
Vial Number : 1

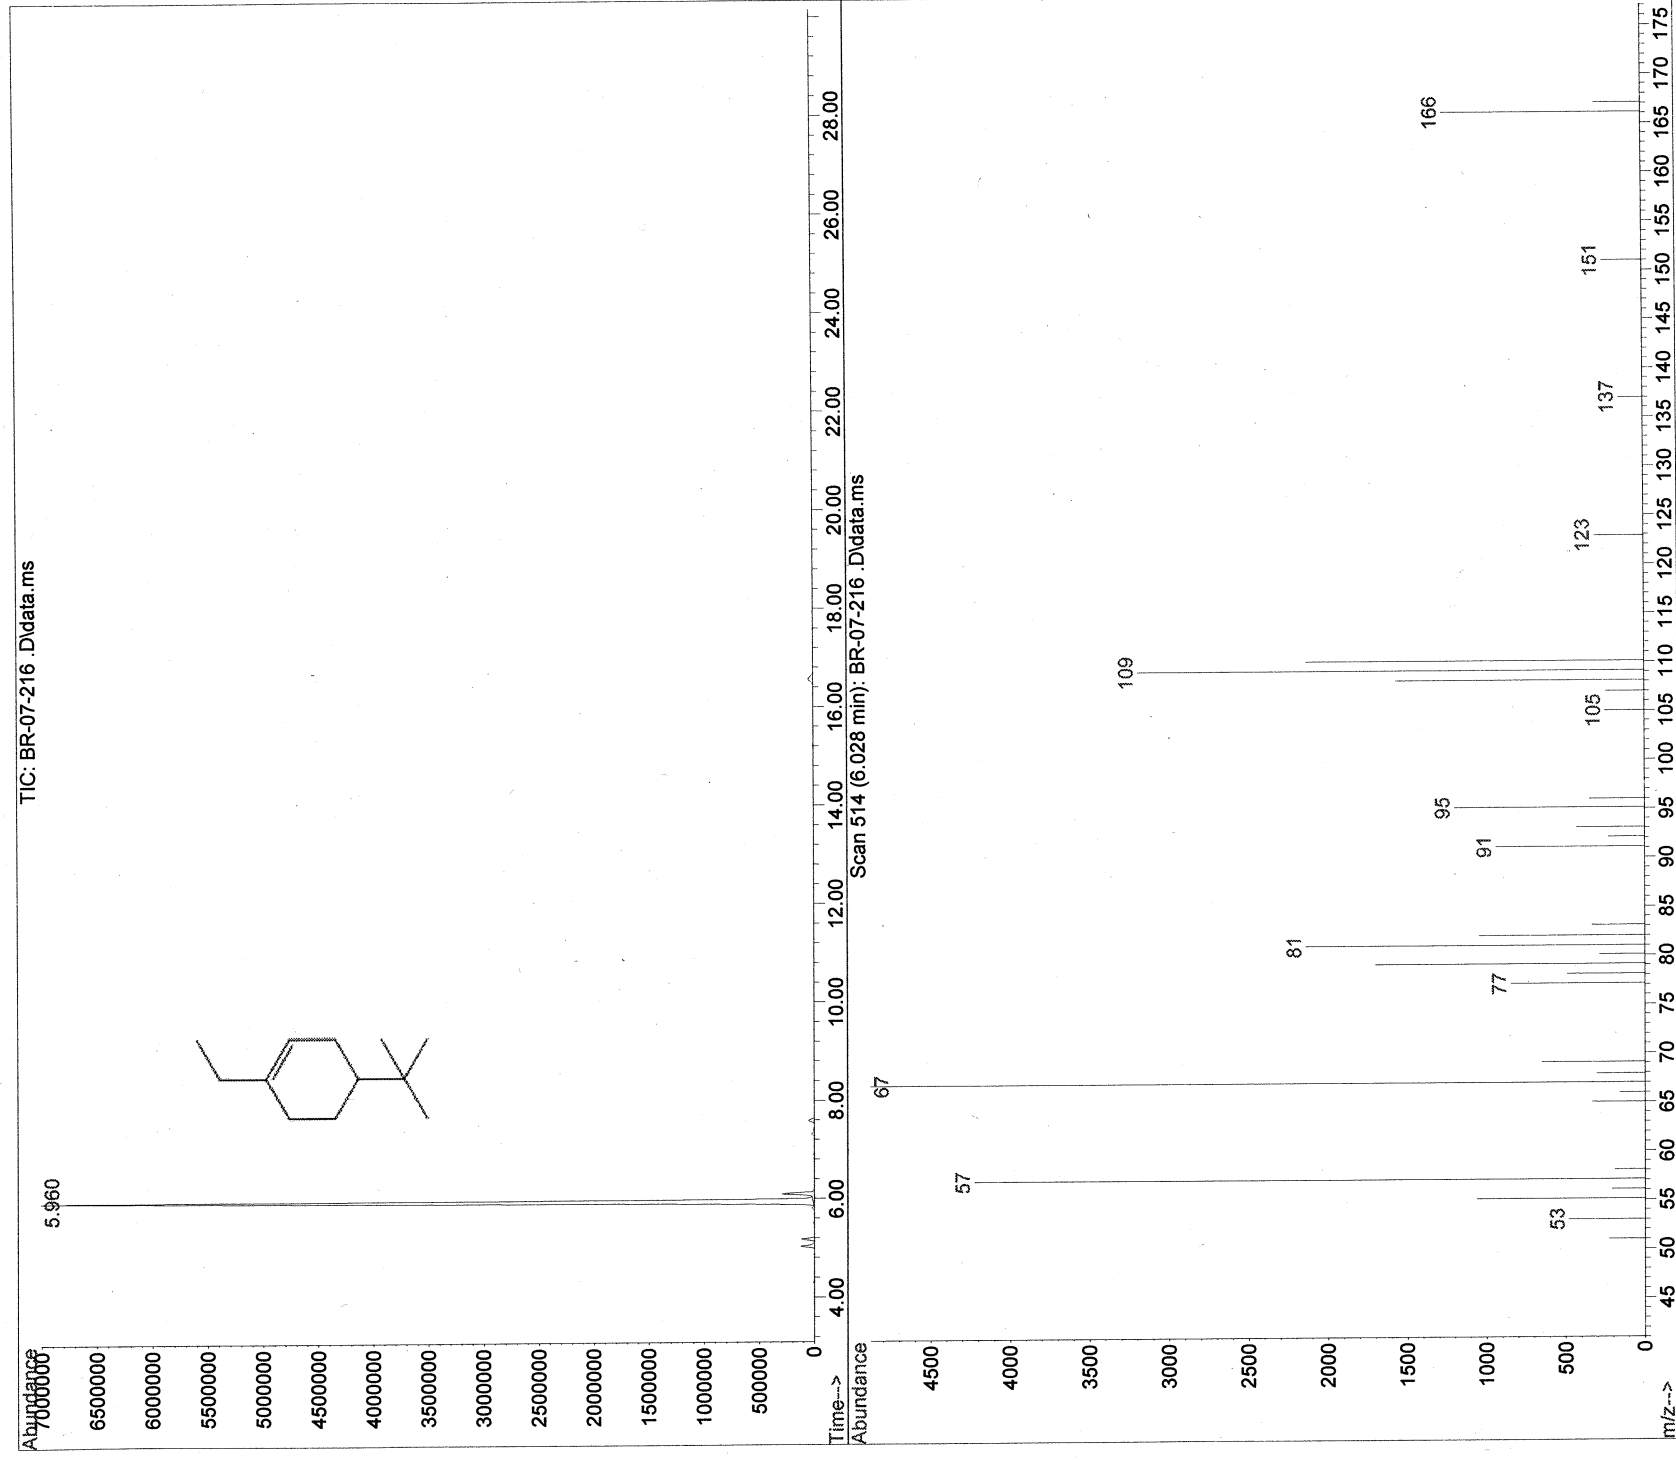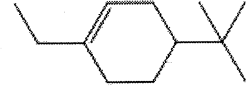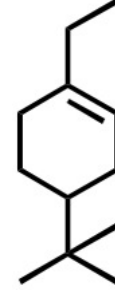

25a

Faculty Group Rajanbabu987  
 PROTON\_OSU CDC13 {C:\Bruker\TopSpin3.0} raya.5 81

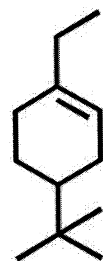

25a

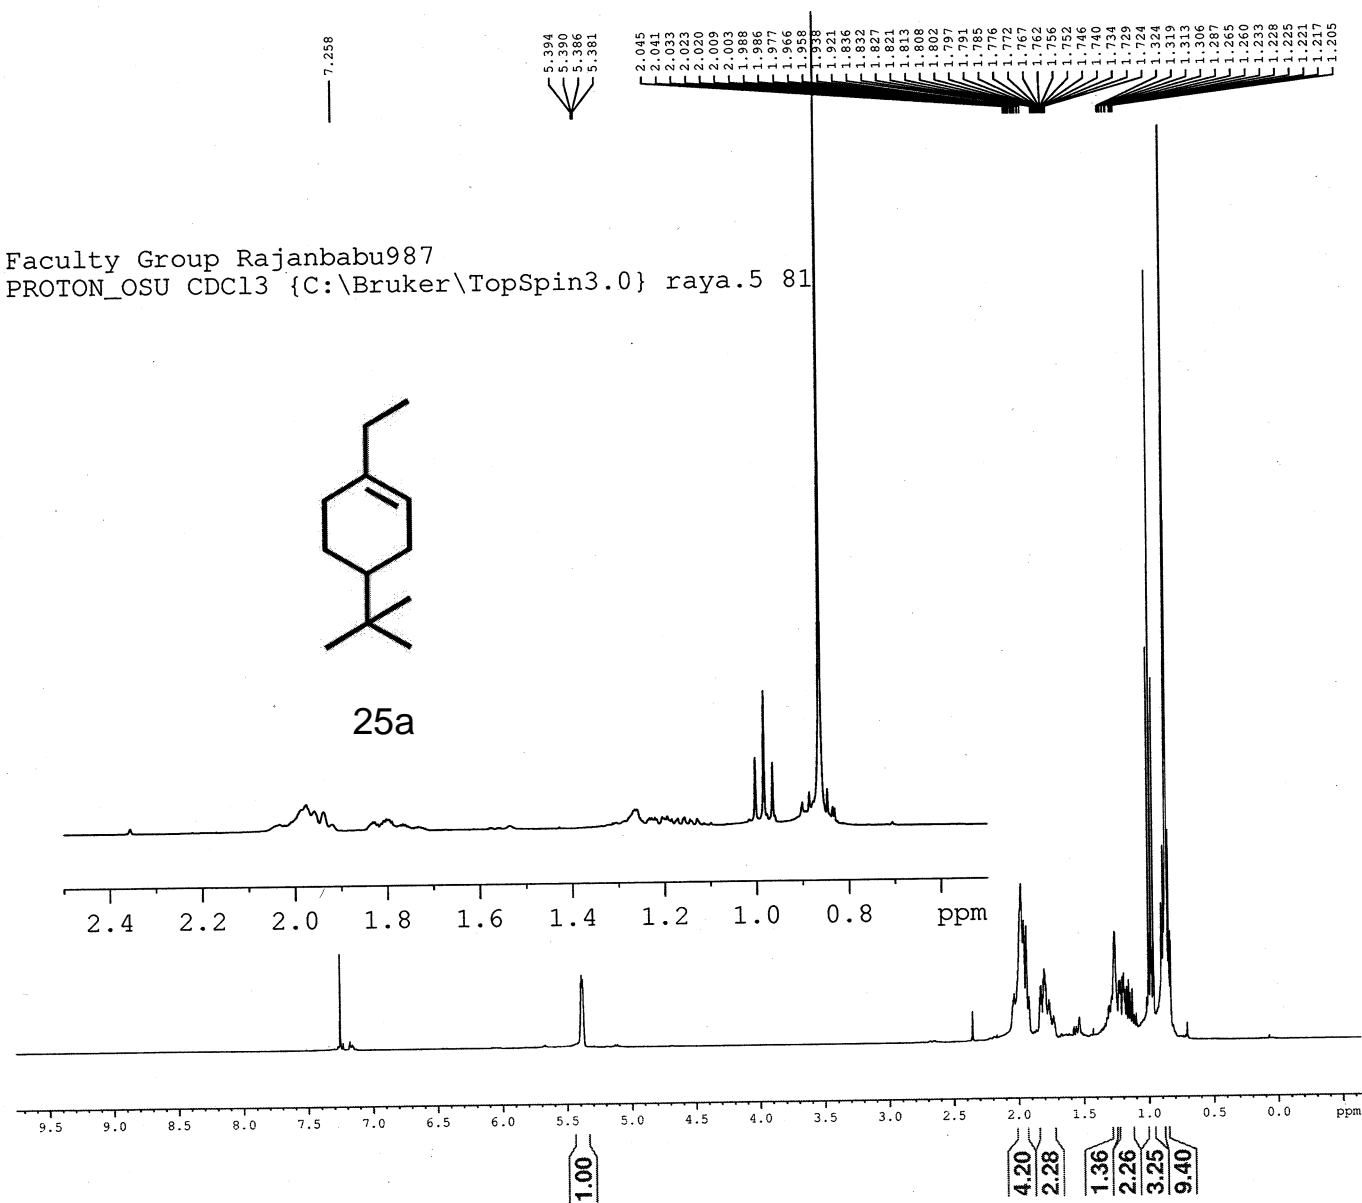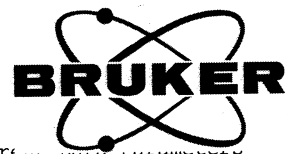

Current Data Parameters  
 NAME BR-07-216 Final  
 EXPNO 1  
 PROCNO 1

F2 - Acquisition Parameters  
 Date\_ 20150827  
 Time 19.53  
 INSTRUM spect  
 PROBHD 5 mm PABBO BB/  
 PULPROG zg30  
 TD 65536  
 SOLVENT CDCl3  
 NS 64  
 DS 2  
 SWH 8223.685 Hz  
 FIDRES 0.125483 Hz  
 AQ 3.9845889 sec  
 RG 68.54  
 DW 60.800 usec  
 DE 6.50 usec  
 TE 300.0 K  
 D1 1.00000000 sec  
 TD0 1

===== CHANNEL f1 =====  
 SF01 400.1724712 MHz  
 NUC1 1H  
 P1 15.00 usec  
 PLW1 13.19999981 W

F2 - Processing parameters  
 SI 65536  
 SF 400.1700105 MHz  
 WDW EM  
 SSB 0  
 LB 0.30 Hz  
 GB 0  
 PC 1.00

Faculty Group Rajanbabu987  
C13CPD CDC13 {C:\Bruker\TopSpin3.0} raya.5 81

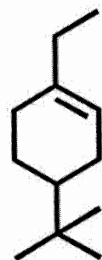

25a

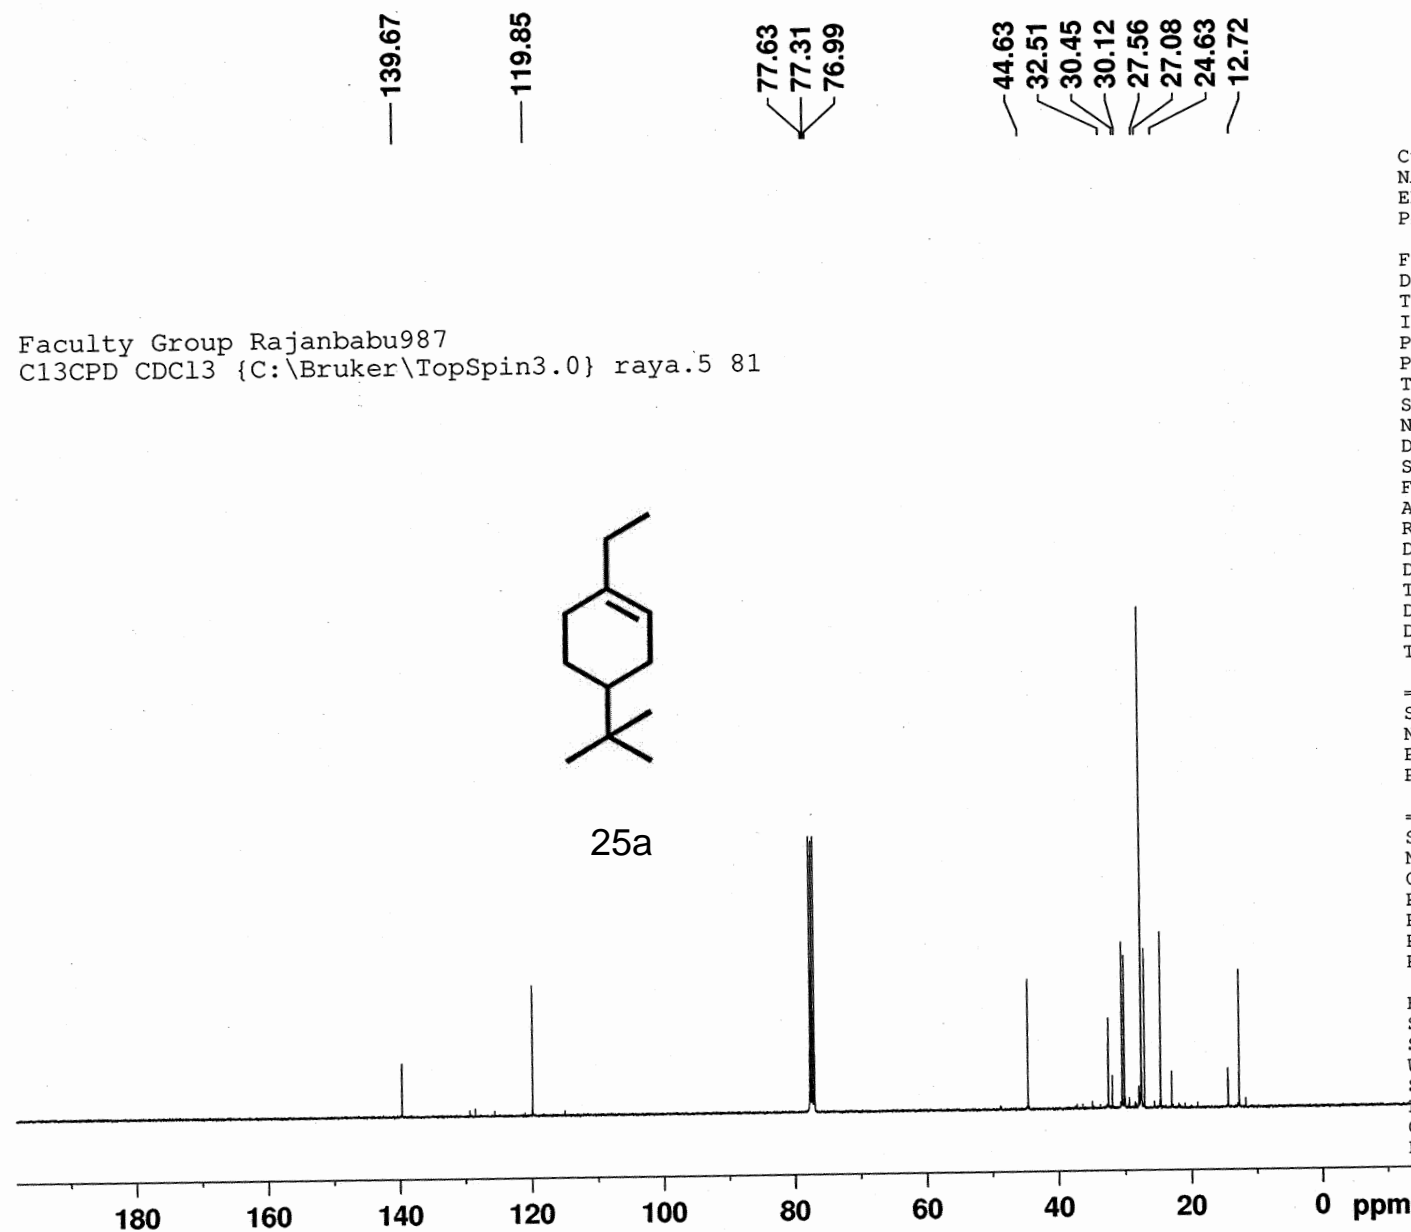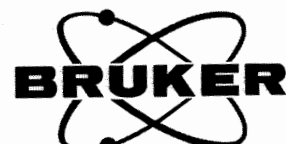

Curr. NAME BR-07-216 Final  
EXPNO 2  
PROCNO 1

F2 - Acquisition Parameters  
Date\_ 20150828  
Time 3.49  
INSTRUM spect  
PROBHD 5 mm PABBO BB/  
PULPROG zgpg30  
TD 65536  
SOLVENT CDCl3  
NS 2048  
DS 4  
SWH 24038.461 Hz  
FIDRES 0.366798 Hz  
AQ 1.3631488 sec  
RG 2050  
DW 20.800 usec  
DE 6.50 usec  
TE 300.6 K  
D1 2.00000000 sec  
D11 0.03000000 sec  
TD0 1

===== CHANNEL f1 =====  
SFO1 100.6328883 MHz  
NUC1 13C  
P1 9.50 usec  
PLW1 53.29999924 W

===== CHANNEL f2 =====  
SFO2 400.1716007 MHz  
NUC2 1H  
CPDPRG[2] waltz16  
PCPD2 80.00 usec  
PLW2 14.60000038 W  
PLW12 0.51327997 W  
PLW13 0.32850000 W

F2 - Processing parameters  
SI 32768  
SF 100.6227953 MHz  
WDW EM  
SSB 0  
LB 1.00 Hz  
GB 0  
PC 1.40

\* BREAK  
\* BREAK  
\* BREAK  
\* BREAK  
\* BREAK

\*AN  
RUN # 1725 AUG 7, 1901 15:27:46  
START

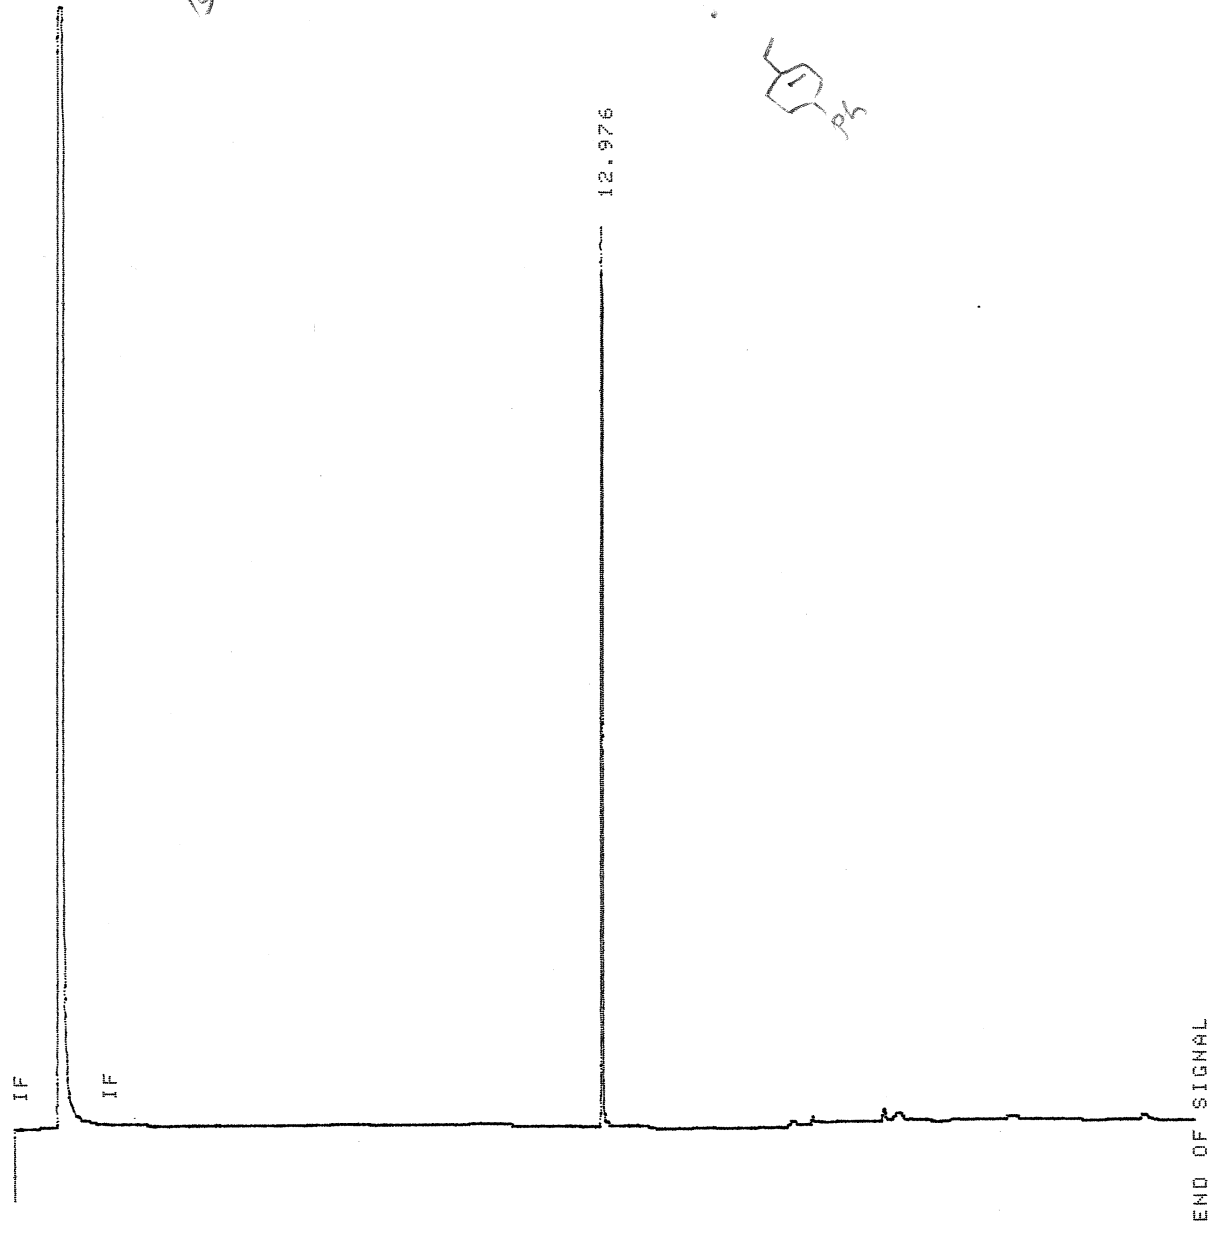

Error storing signal to M:SIGNAL .BNA  
DIRECTORY FULL  
Storing processed peaks to M:SIGNAL .PRA

RUN# 1725 AUG 7, 1901 15:27:46

PEAK FILE : M:SIGNAL.PRA

| AREA%  | RT     | AREA | TYPE | WIDTH     | AREA% |
|--------|--------|------|------|-----------|-------|
| 12.976 | 782077 | SBB  | .031 | 100.00000 |       |

TOTAL AREA= 782077  
MUL FACTOR=1.00000E+00

BR-07-212  
100°C - 10 min  
rate - 20°C  
250°C - 40 min

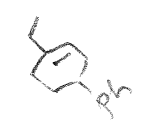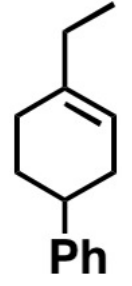

25b

File : D:\MSDCHEMData\Babu\Balaram\BR-07-212 REDUCTION .D  
Operator : BALARAM  
Acquired : 1 Aug 2015 16:32 using AcqMethod 100-ISOTHERM.M  
Instrument : GCMS  
Sample Name: BR-07-212 REDUCTION  
Misc Info :  
Vial Number: 1

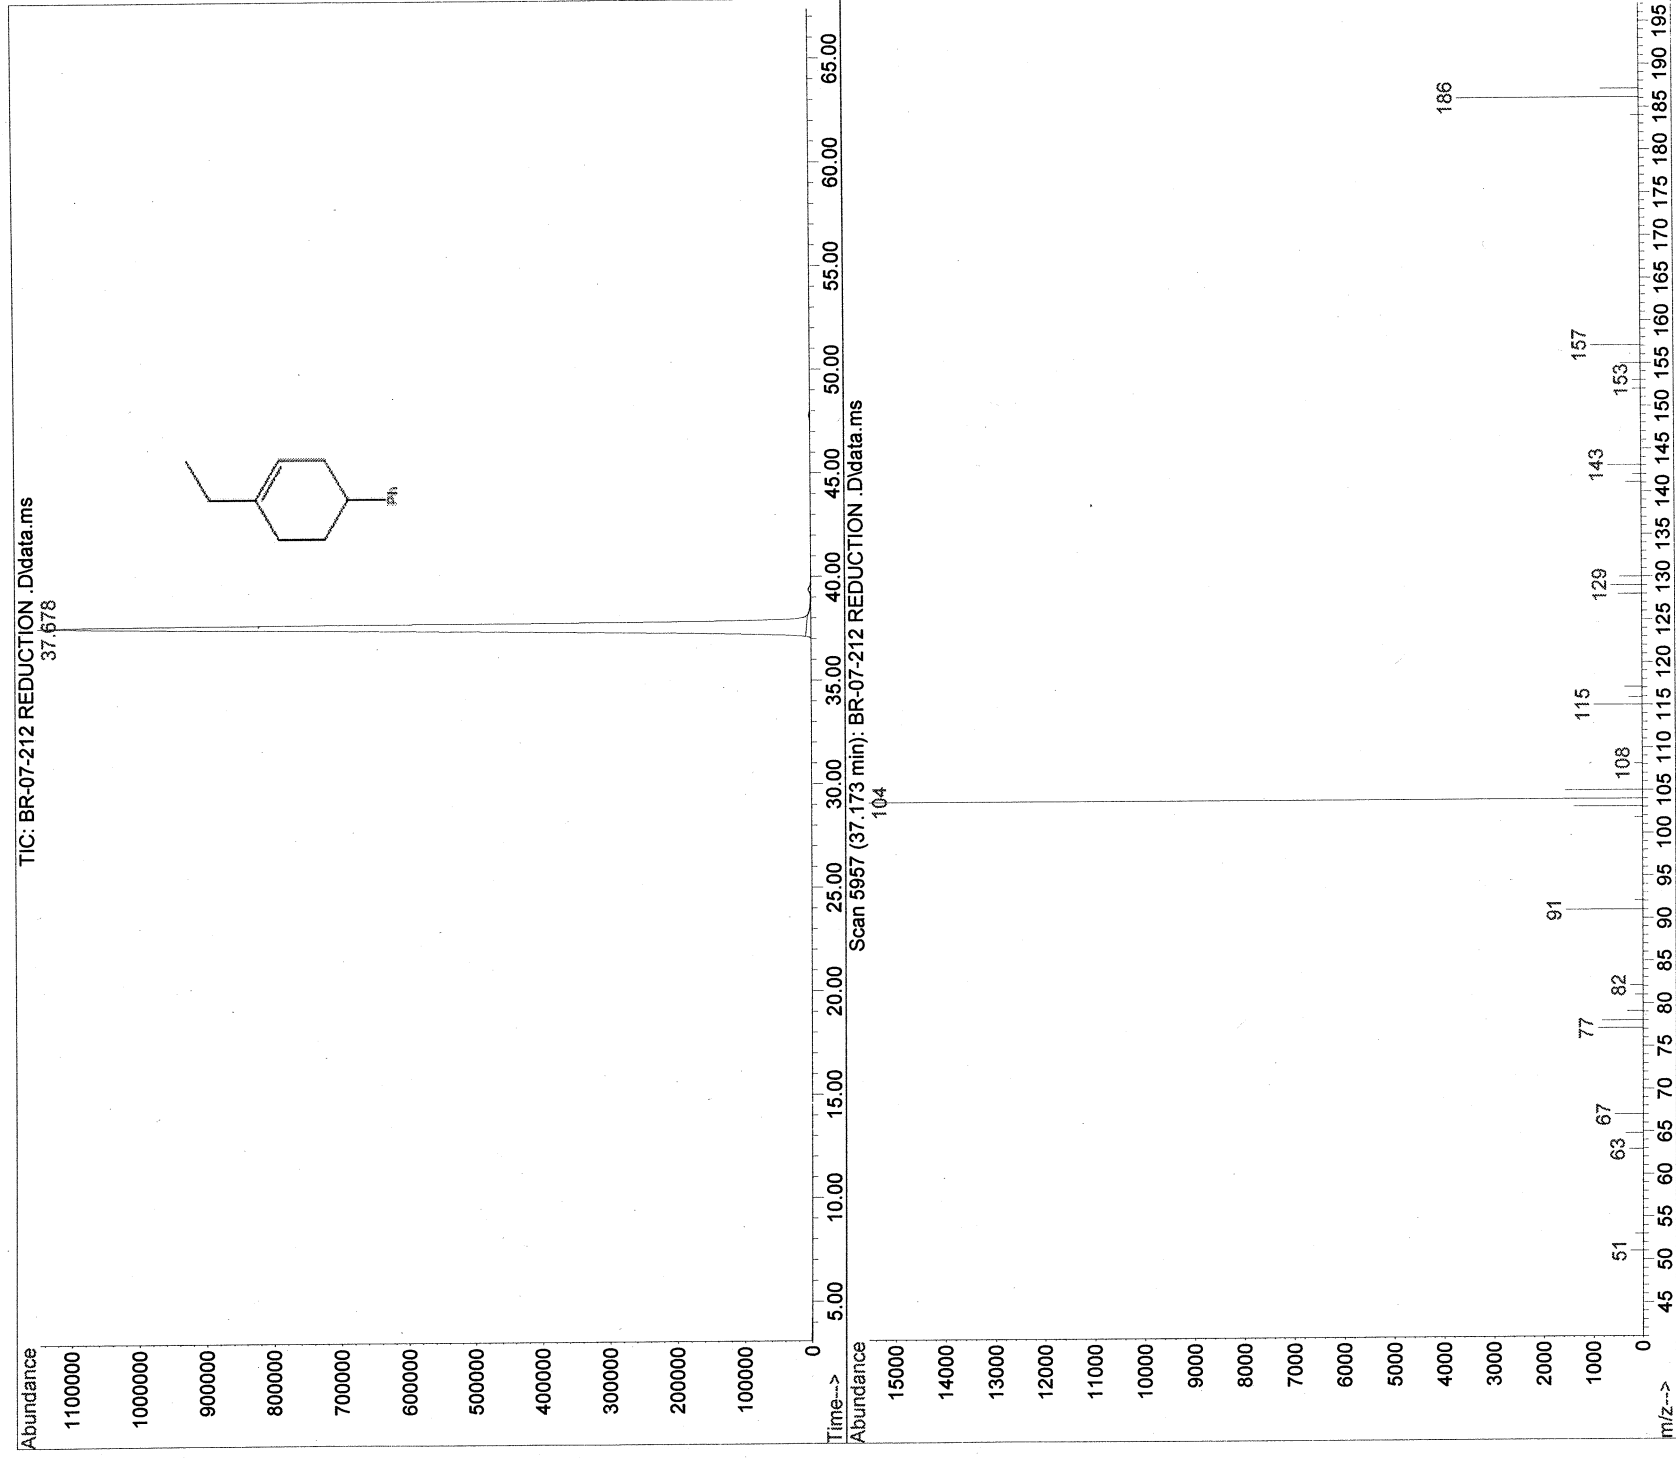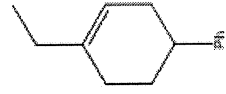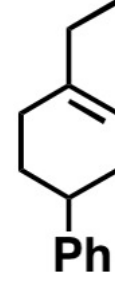

25b



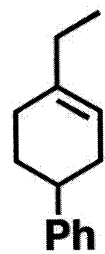

25b

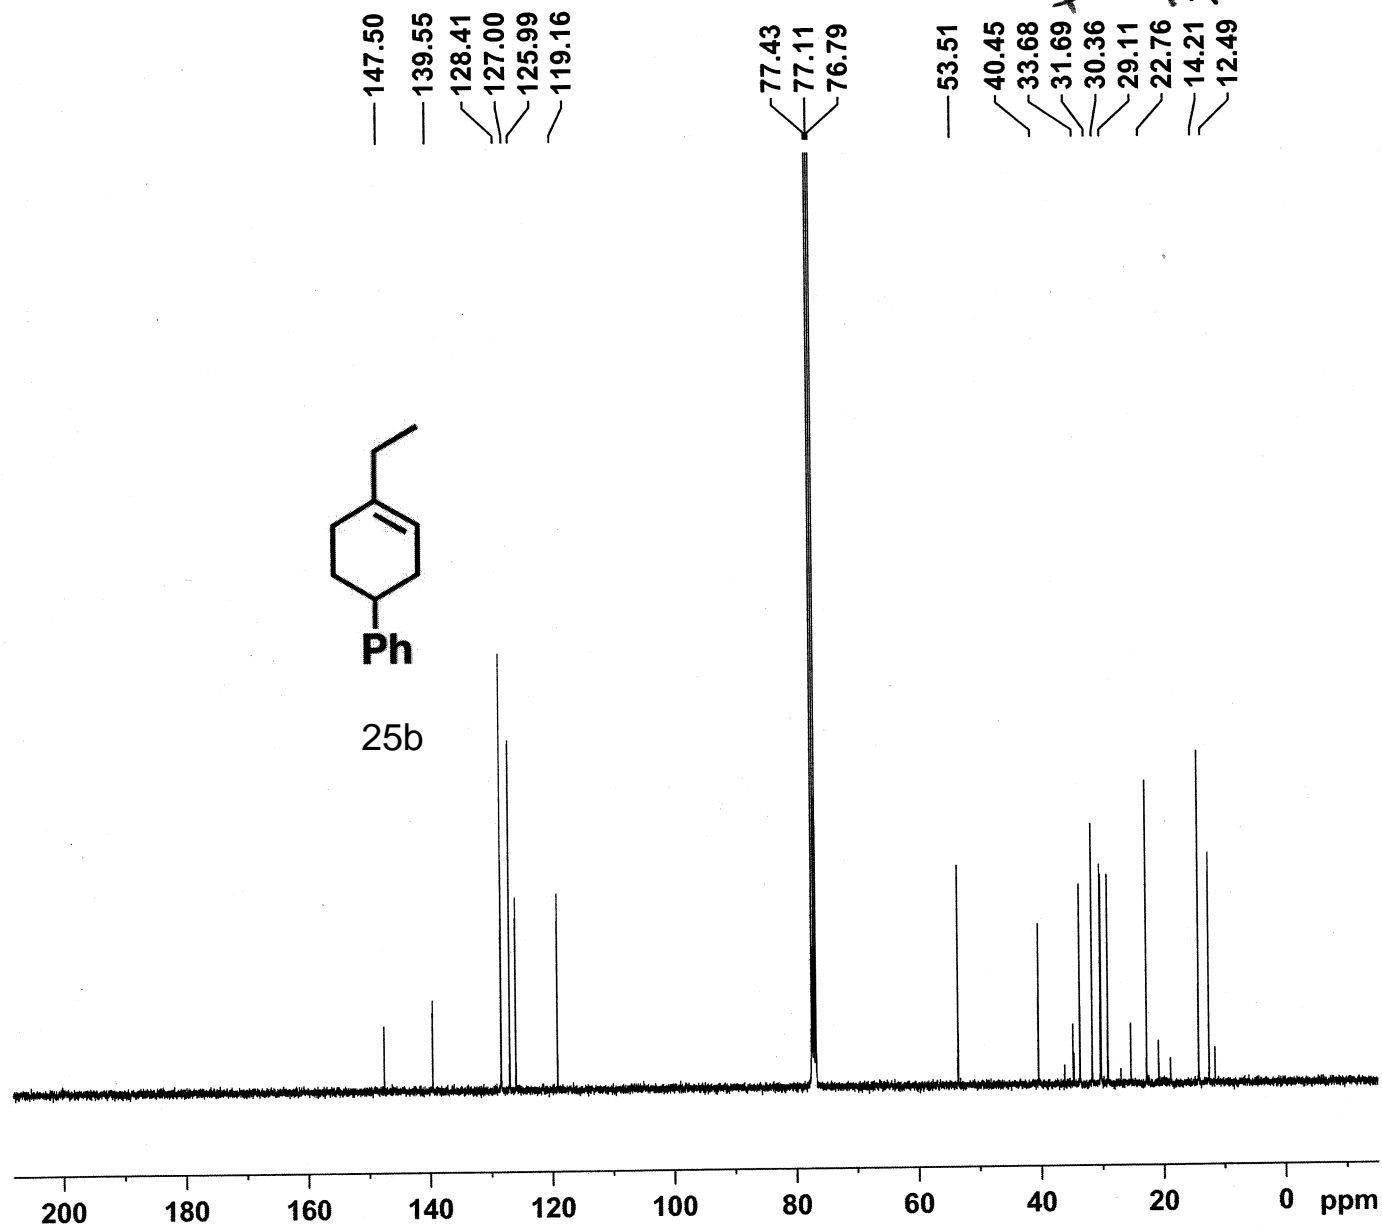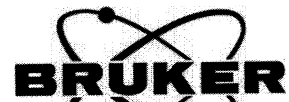

Cur: BR-07-212 reduction  
 NAME: BR-07-212 reduction  
 EXPNO: 2  
 PROCNO: 1

F2 - Acquisition Parameters  
 Date: 20150730  
 Time: 3.48  
 INSTRUM: spect  
 PROBHD: 5 mm PABBO BB/  
 PULPROG: zgpg30  
 TD: 65536  
 SOLVENT: CDCl3  
 NS: 2048  
 DS: 4  
 SWH: 24038.461 Hz  
 FIDRES: 0.366798 Hz  
 AQ: 1.3631488 sec  
 RG: 2050  
 DW: 20.800 usec  
 DE: 6.50 usec  
 TE: 300.0 K  
 D1: 2.00000000 sec  
 D11: 0.03000000 sec  
 TD0: 1

===== CHANNEL f1 =====  
 SFO1: 100.6328883 MHz  
 NUC1: 13C  
 P1: 9.50 usec  
 PLW1: 53.29999924 W

===== CHANNEL f2 =====  
 SFO2: 400.1716007 MHz  
 NUC2: 1H  
 CPDPRG[2]: waltz16  
 PCPD2: 80.00 usec  
 PLW2: 14.60000038 W  
 PLW12: 0.51327997 W  
 PLW13: 0.32850000 W

F2 - Processing parameters  
 SI: 32768  
 SF: 100.6228168 MHz  
 WDW: EM  
 SSB: 0  
 LB: 1.00 Hz  
 GB: 0  
 PC: 1.40

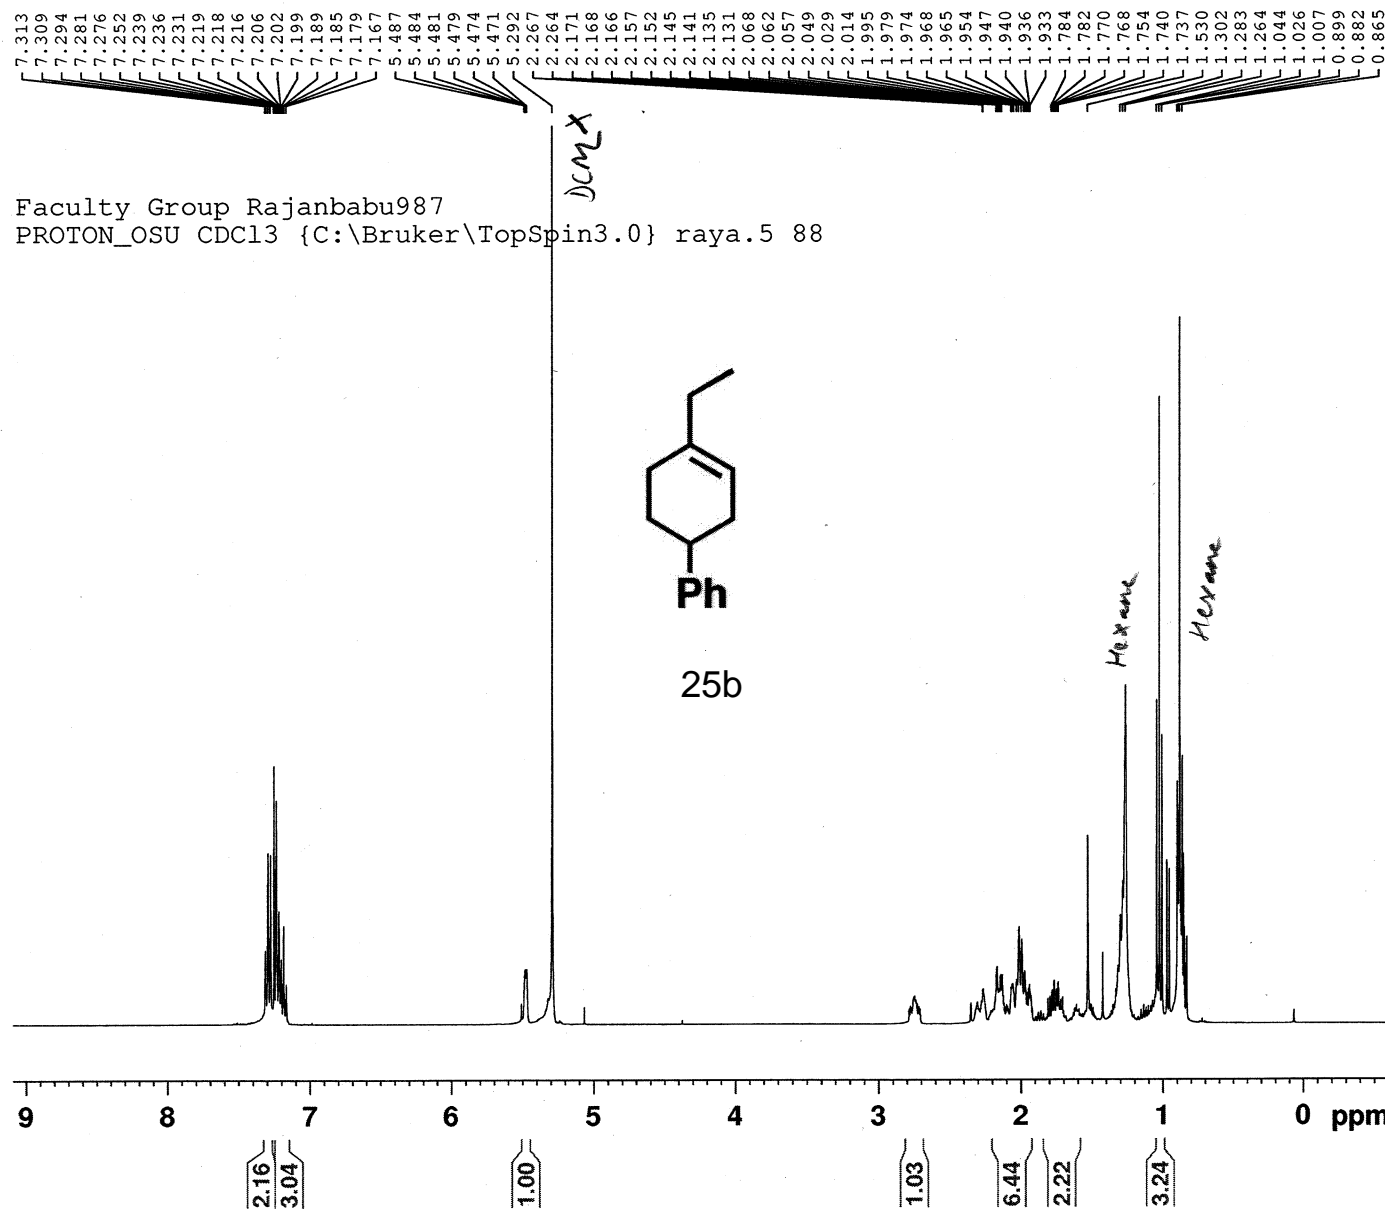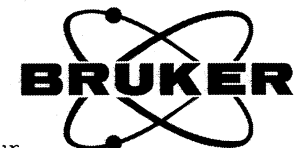

Cur\_...  
 NAME BR-07-212 reduction  
 EXPNO 1  
 PROCNO 1

F2 - Acquisition Parameters  
 Date\_ 20150729  
 Time 14.34  
 INSTRUM spect  
 PROBHD 5 mm PABBO BB/  
 PULPROG zg30  
 TD 65536  
 SOLVENT CDCl3  
 NS 64  
 DS 2  
 SWH 8223.685 Hz  
 FIDRES 0.125483 Hz  
 AQ 3.9845889 sec  
 RG 120.36  
 DW 60.800 usec  
 DE 6.50 usec  
 TE 300.0 K  
 D1 1.00000000 sec  
 TD0 1

==== CHANNEL f1 =====  
 SFO1 400.1724712 MHz  
 NUC1 1H  
 P1 15.00 usec  
 PLW1 13.19999981 W

F2 - Processing parameters  
 SI 65536  
 SF 400.1700129 MHz  
 WDW EM  
 SSB 0  
 LB 0.30 Hz  
 GB 0  
 PC 1.00

\* BREAK  
 \* BREAK

File :D:\MSDCHEMData\Babu\Balaram\BR-07-232.D  
Operator : BALARAM  
Acquired : 2 Sep 2015 14:59 using AcqMethod 40-ISOTHERM.M  
Instrument : GCMS  
Sample Name: BR-07-232  
Misc Info :  
Vial Number: 1

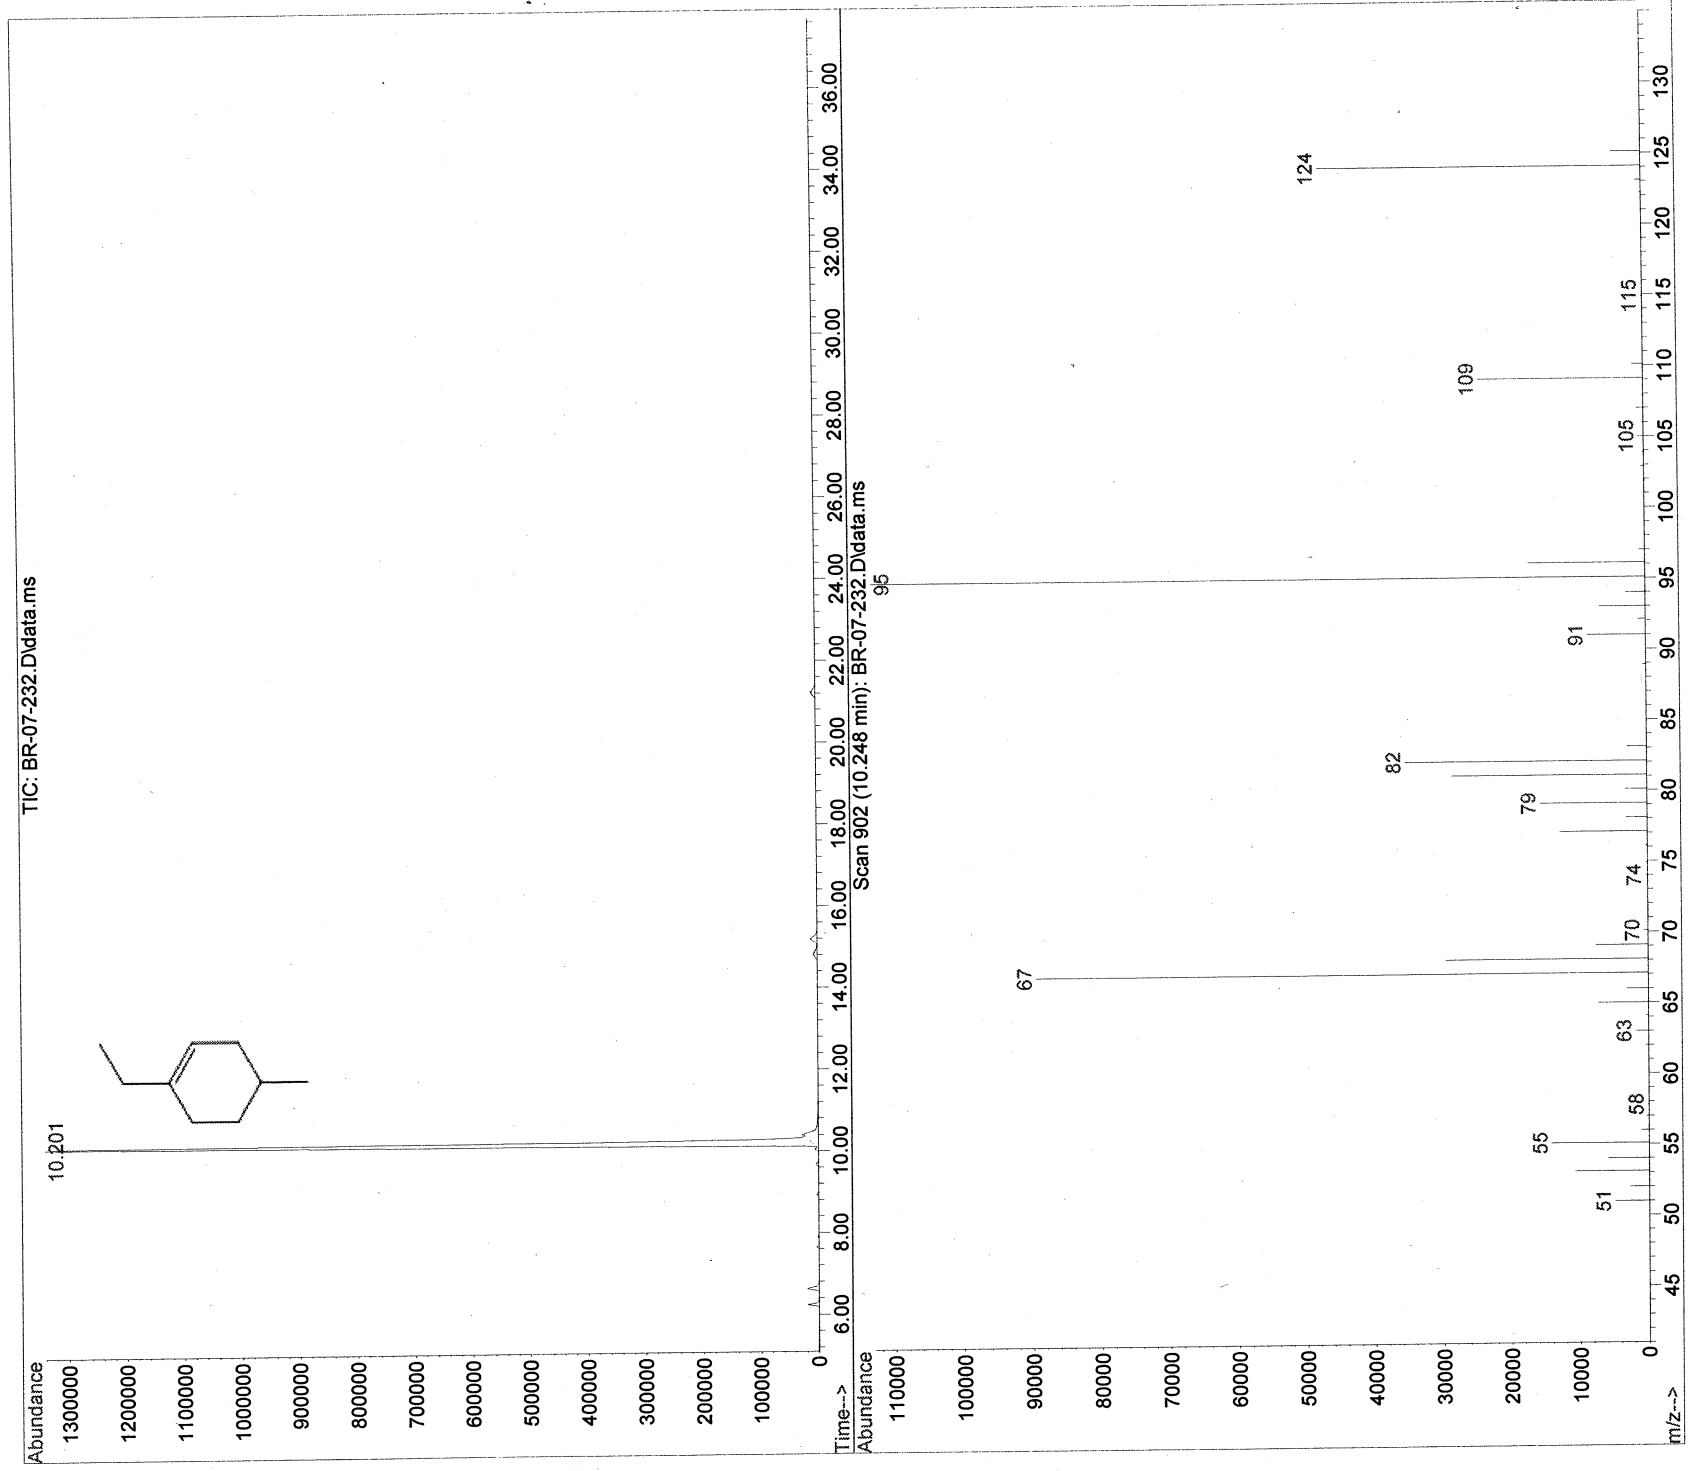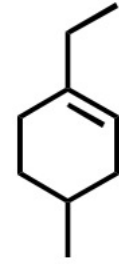

25c

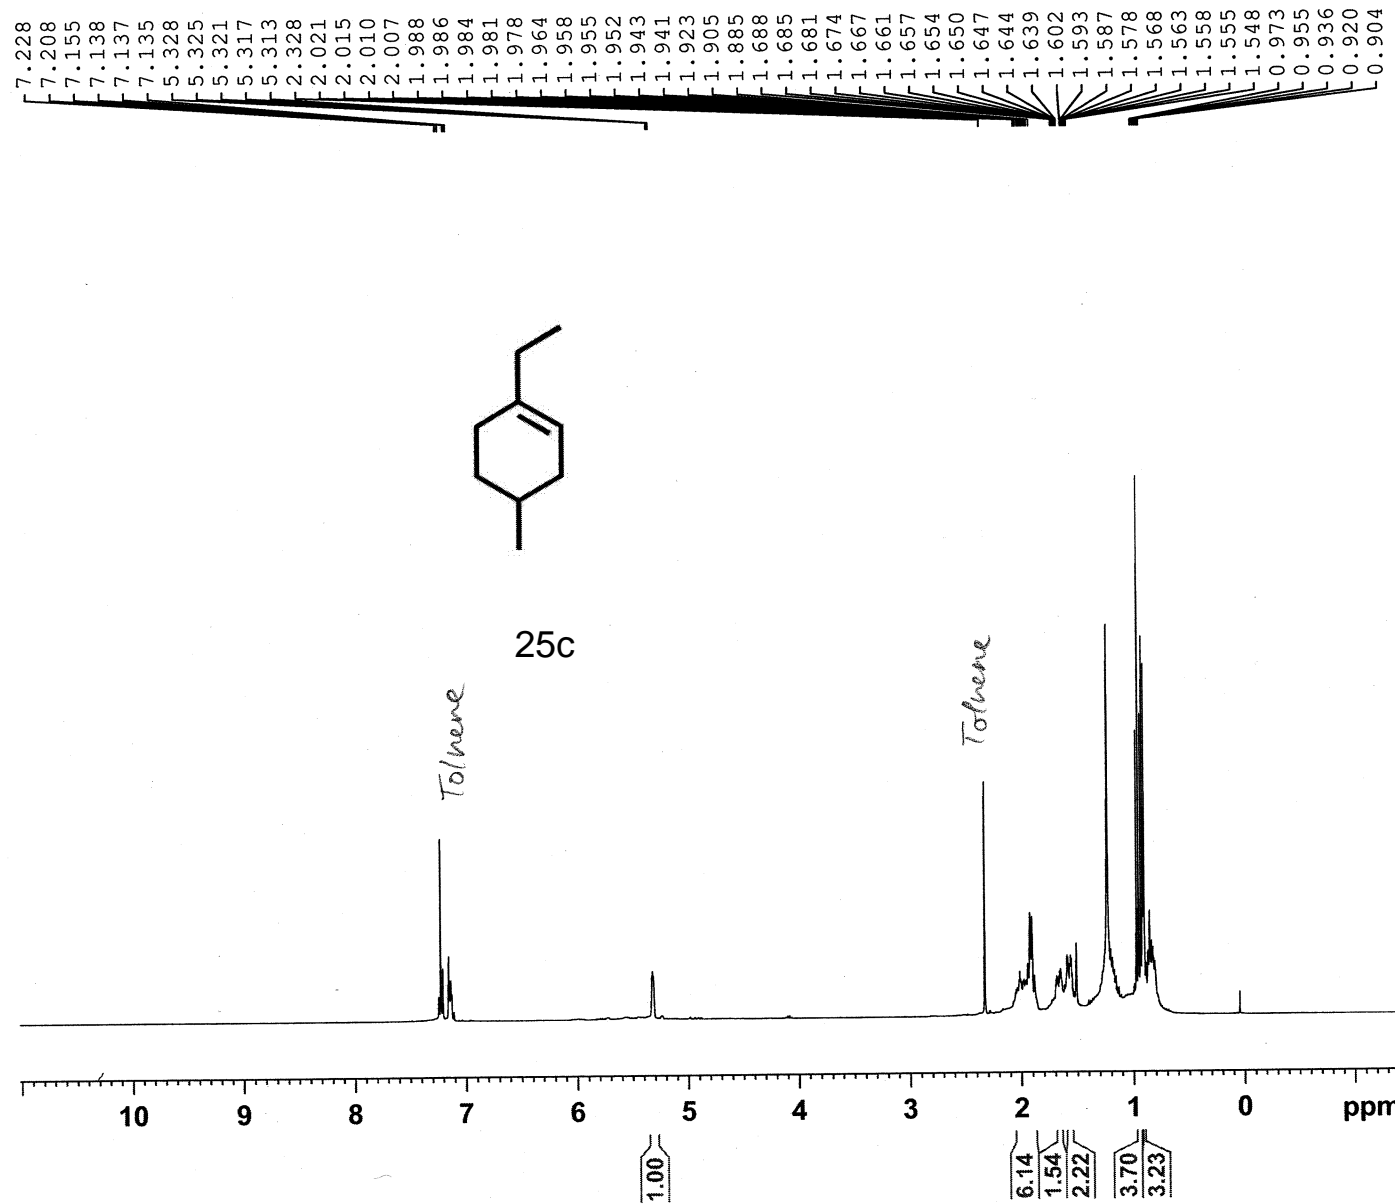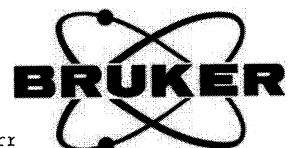

Cur  
NAME BR-U/-232 Second  
EXPNO 1  
PROCNO 1

F2 - Acquisition Parameters  
Date\_ 20150904  
Time\_ 12.24  
INSTRUM spect  
PROBHD 5 mm PABBO BB/  
PULPROG zg30  
TD 65536  
SOLVENT CDCl3  
NS 64  
DS 2  
SWH 8223.685 Hz  
FIDRES 0.125483 Hz  
AQ 3.9845889 sec  
RG 99.77  
DW 60.800 usec  
DE 6.50 usec  
TE 300.0 K  
D1 1.00000000 sec  
TD0 1

==== CHANNEL f1 =====  
SFO1 400.1724712 MHz  
NUC1 1H  
P1 15.00 usec  
PLW1 13.19999981 W

F2 - Processing parameters  
SI 65536  
SF 400.1700226 MHz  
WDW EM  
SSB 0  
LB 0.30 Hz  
GB 0  
PC 1.00

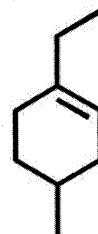

25c

139.33  
138.02  
129.18  
128.37  
125.45  
119.06

34.05  
31.50  
30.46  
29.86  
28.75  
28.58  
21.99  
12.54

X = Toluene

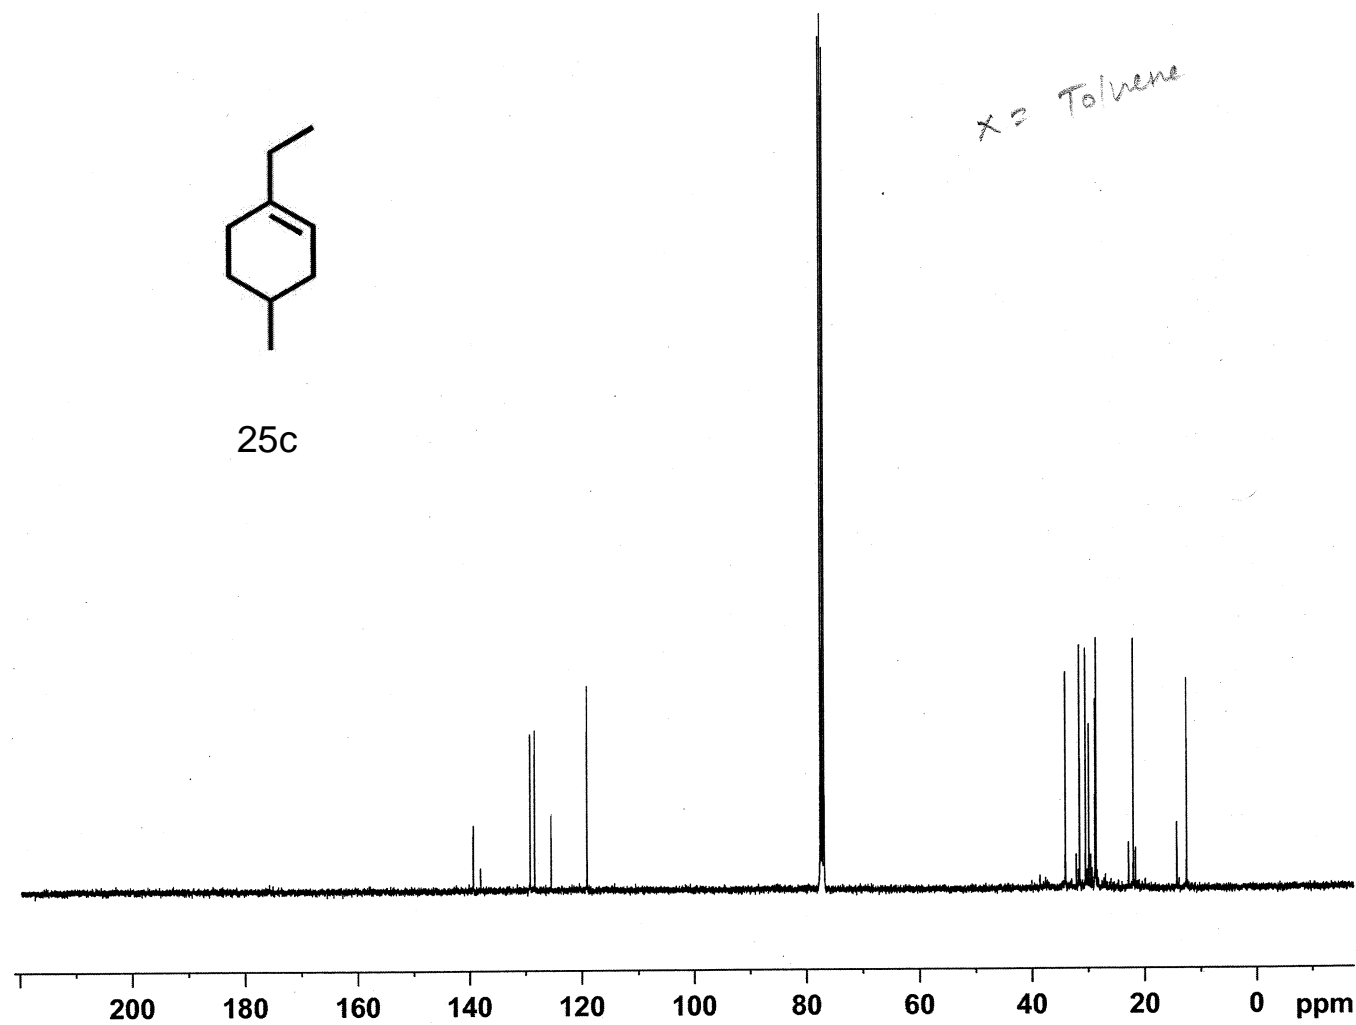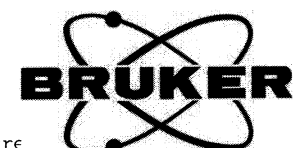

Curre  
NAME BR-07-232 Second  
EXPNO 2  
PROCNO 1

F2 - Acquisition Parameters  
Date\_ 20150905  
Time\_ 5.12  
INSTRUM spect  
PROBHD 5 mm PABBO BB/  
PULPROG zgpg30  
TD 65536  
SOLVENT CDC13  
NS 2048  
DS 4  
SWH 24038.461 Hz  
FIDRES 0.366798 Hz  
AQ 1.3631488 sec  
RG 1820  
DW 20.800 usec  
DE 6.50 usec  
TE 300.0 K  
D1 2.00000000 sec  
D11 0.03000000 sec  
TD0 1

==== CHANNEL f1 =====  
SFO1 100.6328883 MHz  
NUC1 13C  
P1 9.50 usec  
PLW1 53.29999924 W

==== CHANNEL f2 =====  
SFO2 400.1716007 MHz  
NUC2 1H  
CPDPRG[2] waltz16  
PCPD2 80.00 usec  
PLW2 14.60000038 W  
PLW12 0.51327997 W  
PLW13 0.32850000 W

F2 - Processing parameters  
SI 32768  
SF 100.6228118 MHz  
WDW EM  
SSB 0  
LB 1.00 Hz  
GB 0  
PC 1.40

\*  
BREAK  
\*  
BREAK  
\*  
BREAK  
\*  
BREAK

\*AN  
RUN # 2203 SEP 25, 1901 17:24:51  
START

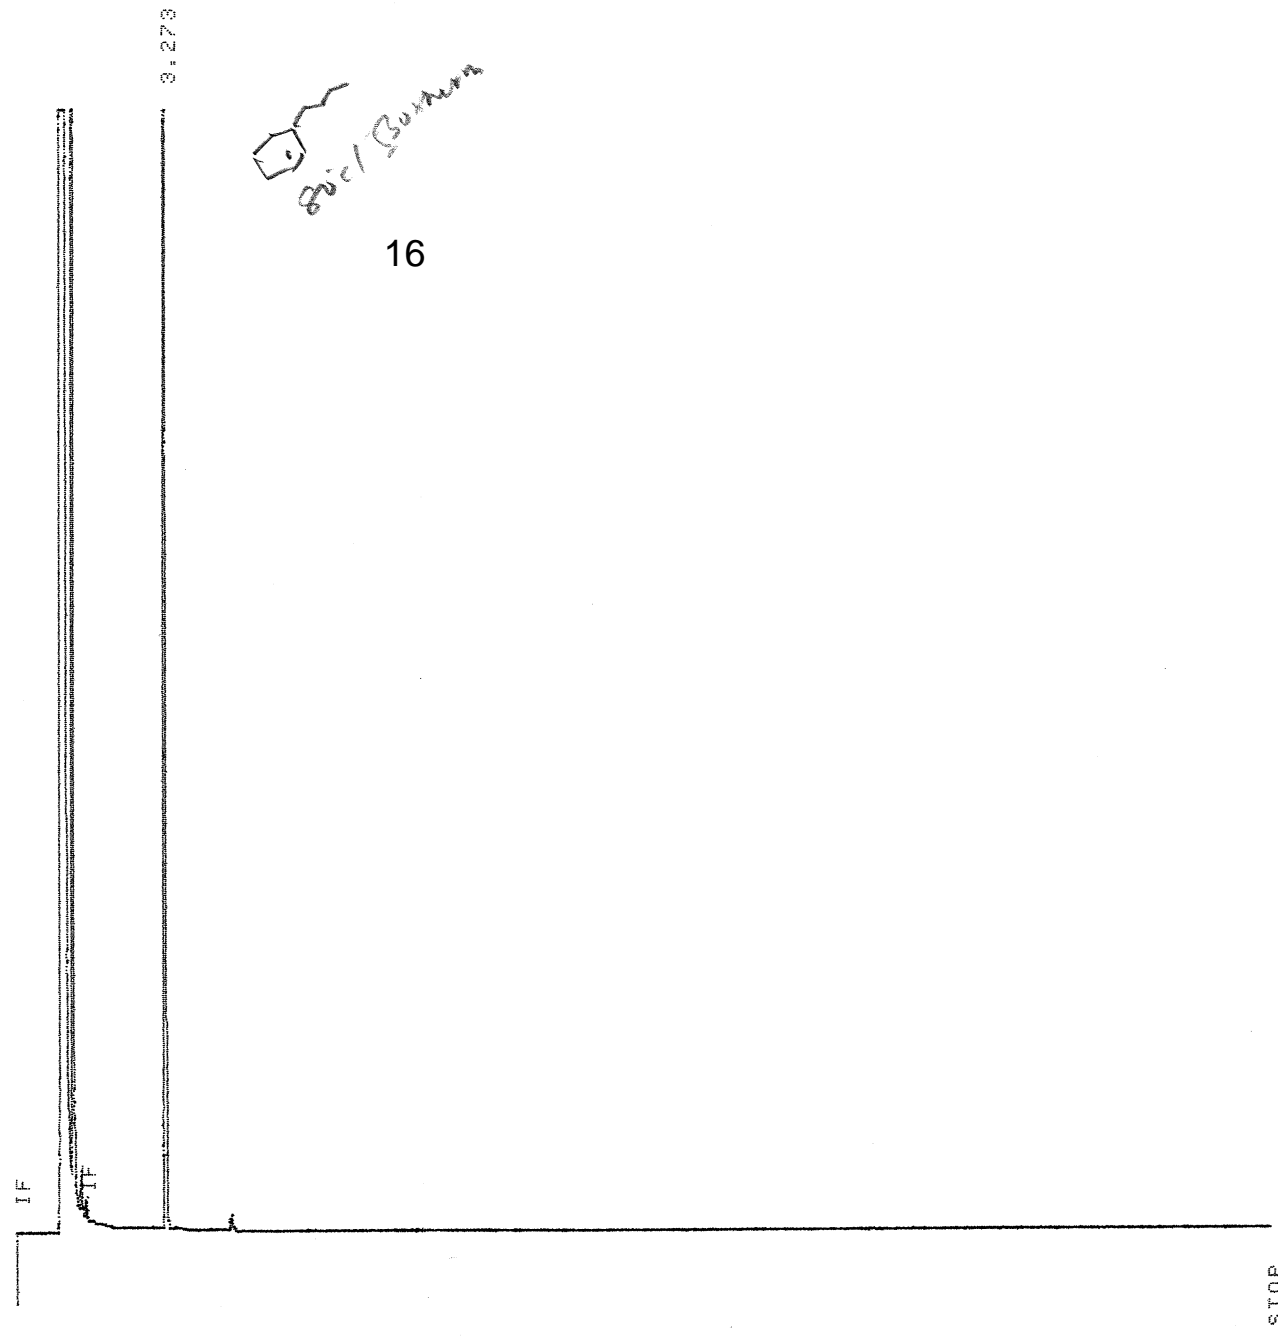

STOP

Error storing signal to M:SIGNAL...BNA  
DIRECTORY FULL

Storing processed peaks to M:SIGNAL...PRA

RUN# 2203 SEP 25, 1901 17:24:51

PEAK FILE : M:SIGNAL.PRA

| AREA% | RT    | AREA    | TYPE | WIDTH | AREA%     |
|-------|-------|---------|------|-------|-----------|
|       | 3.273 | 2292638 | SPB  | .038  | 100.00000 |

TOTAL AREA=2292638  
MUL FACTOR=1.00000E+00

\*  
BREAK  
\*  
BREAK

BR-08-248  
80°C / Isotherm

(crude 0.001 equiv. catalyst)

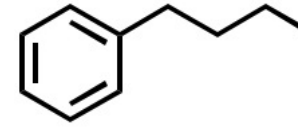

16

File :D:\MSDCHEMData\Babu\Balaram\BR-07-248.D  
Operator : BALARAM  
Acquired : 16 Sep 2015 12:19 using AcqMethod 80-Isotherm.M  
Instrument : GCMS  
Sample Name: BR-07-248  
Misc Info :  
Vial Number: 1

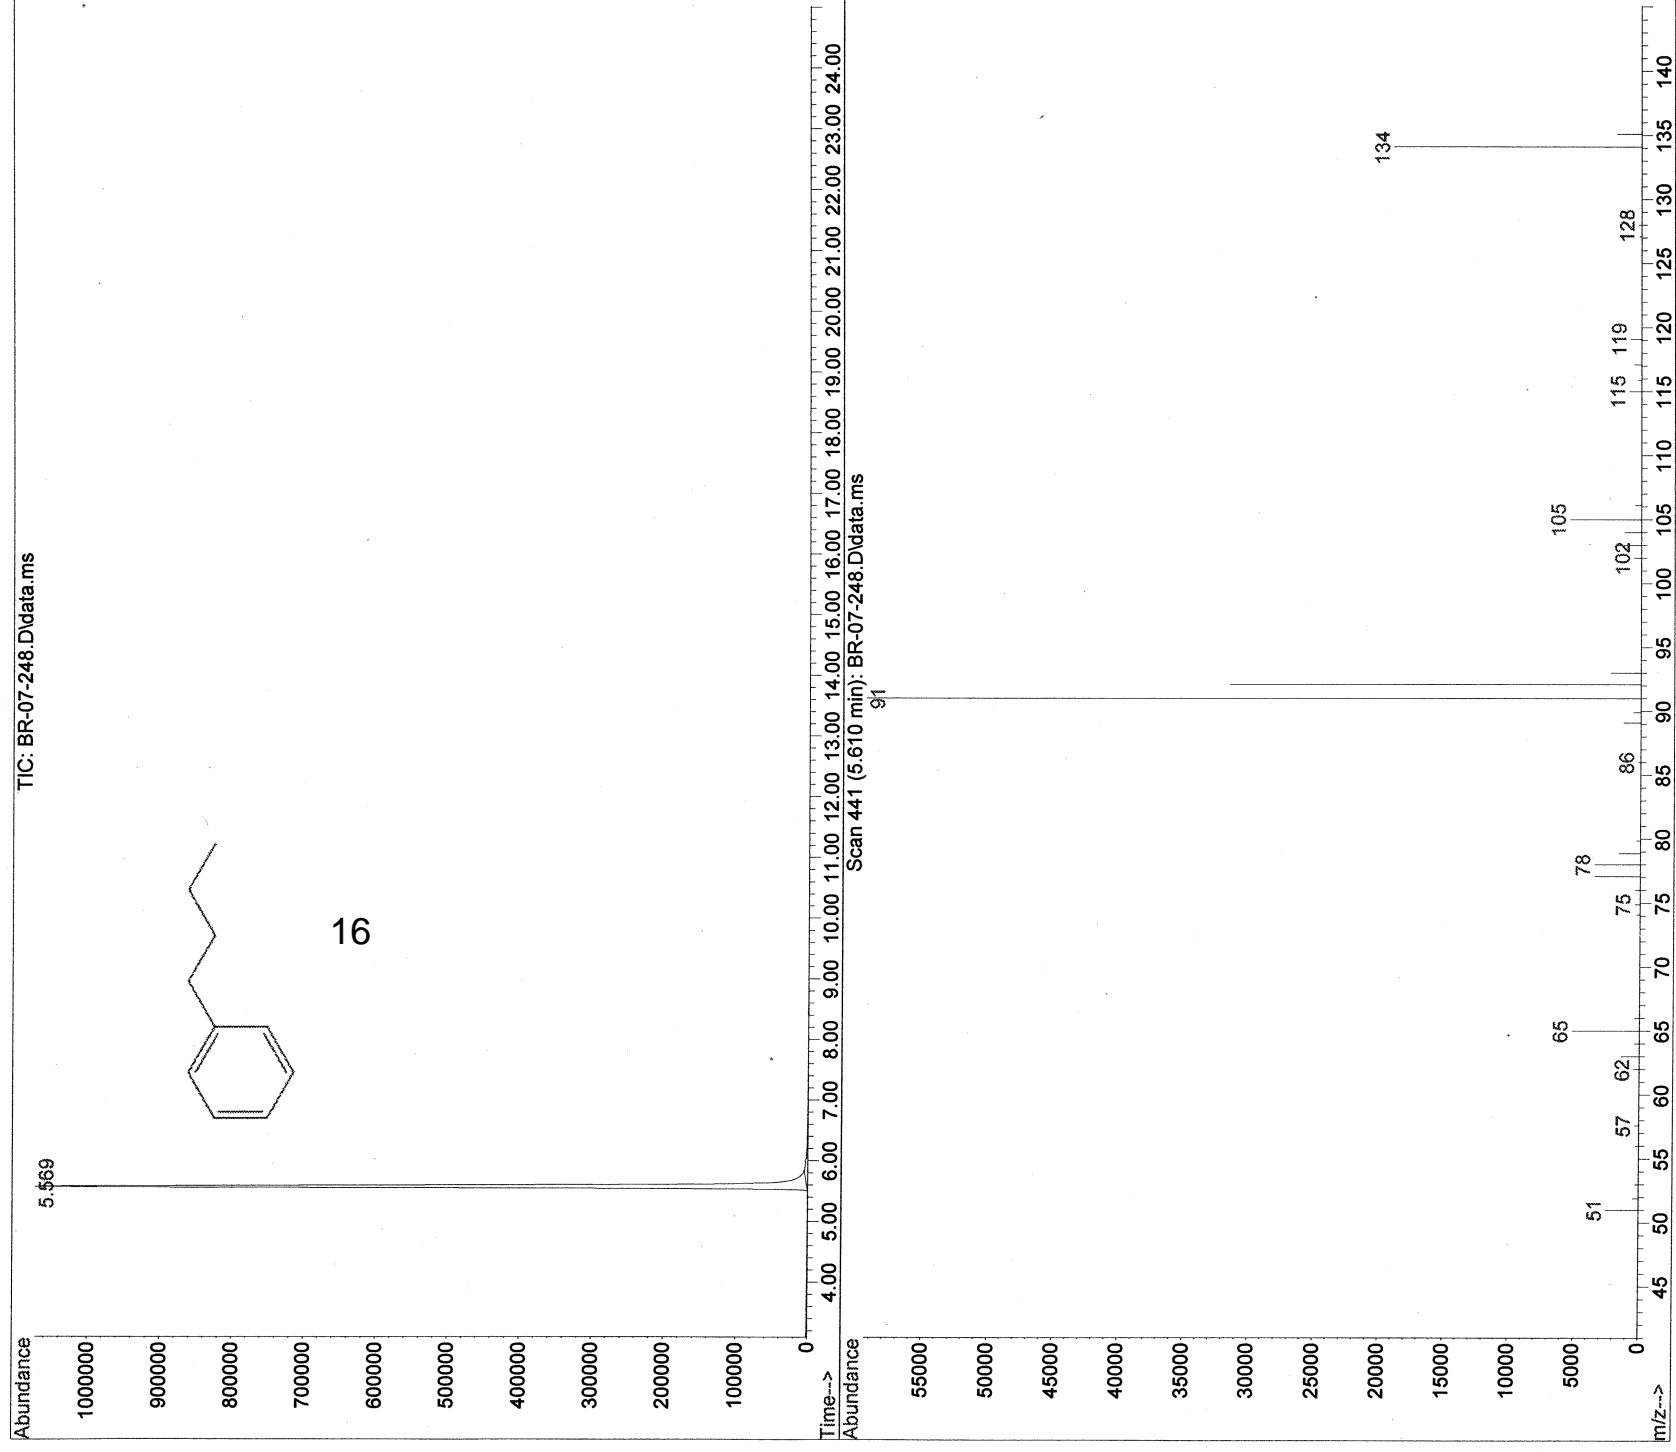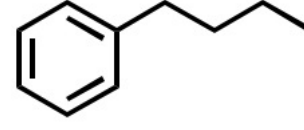

\* BREAK  
\* BREAK  
\* BREAK  
\* BREAK  
\* BREAK

\*AN  
RUN # 2250    OCT 2, 1991 15:55:26  
START

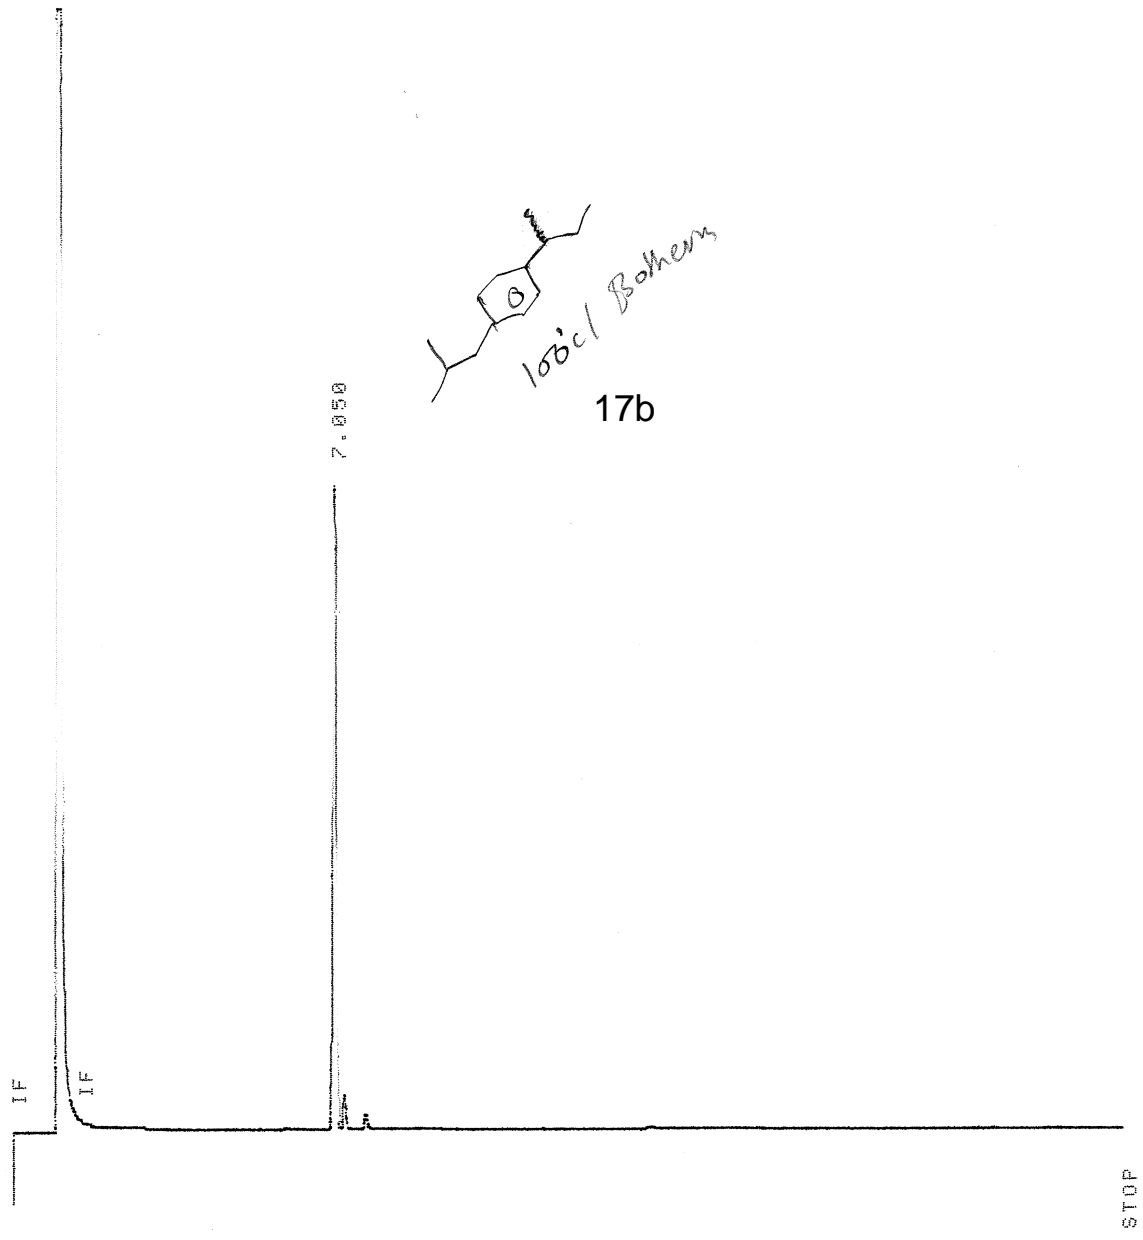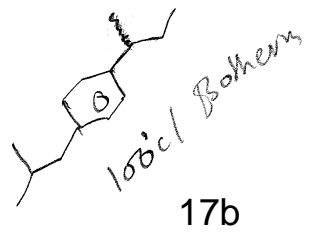

BR-07-244  
100% Isothurs

STOP

Error storing signal to M:SIGNAL .BNA  
DIRECTORY FULL

Storing processed peaks to M:SIGNAL.PRC

RUN# 2250    OCT 2, 1991 15:55:26

PEAK FILE : M:SIGNAL.PRA  
AREA#    RT    AREA TYPE    WIDTH    AREA#  
         7.050    2665261    PB    .075    100.00000

TOTAL AREA=2665261  
MUL FACTOR=1.00000E+00

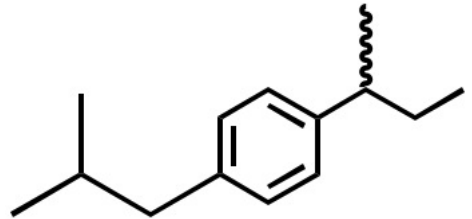



File :D:\MSDCHEMData\Babu\Balaram\BR-07-244 FINAL .D  
Operator : BALARAM  
Acquired : 23 Sep 2015 10:42 using AcqMethod 100-ISOTHERM.M  
Instrument : GCMS  
Sample Name: BR-07-244 FINAL  
Misc Info :  
Vial Number: 1

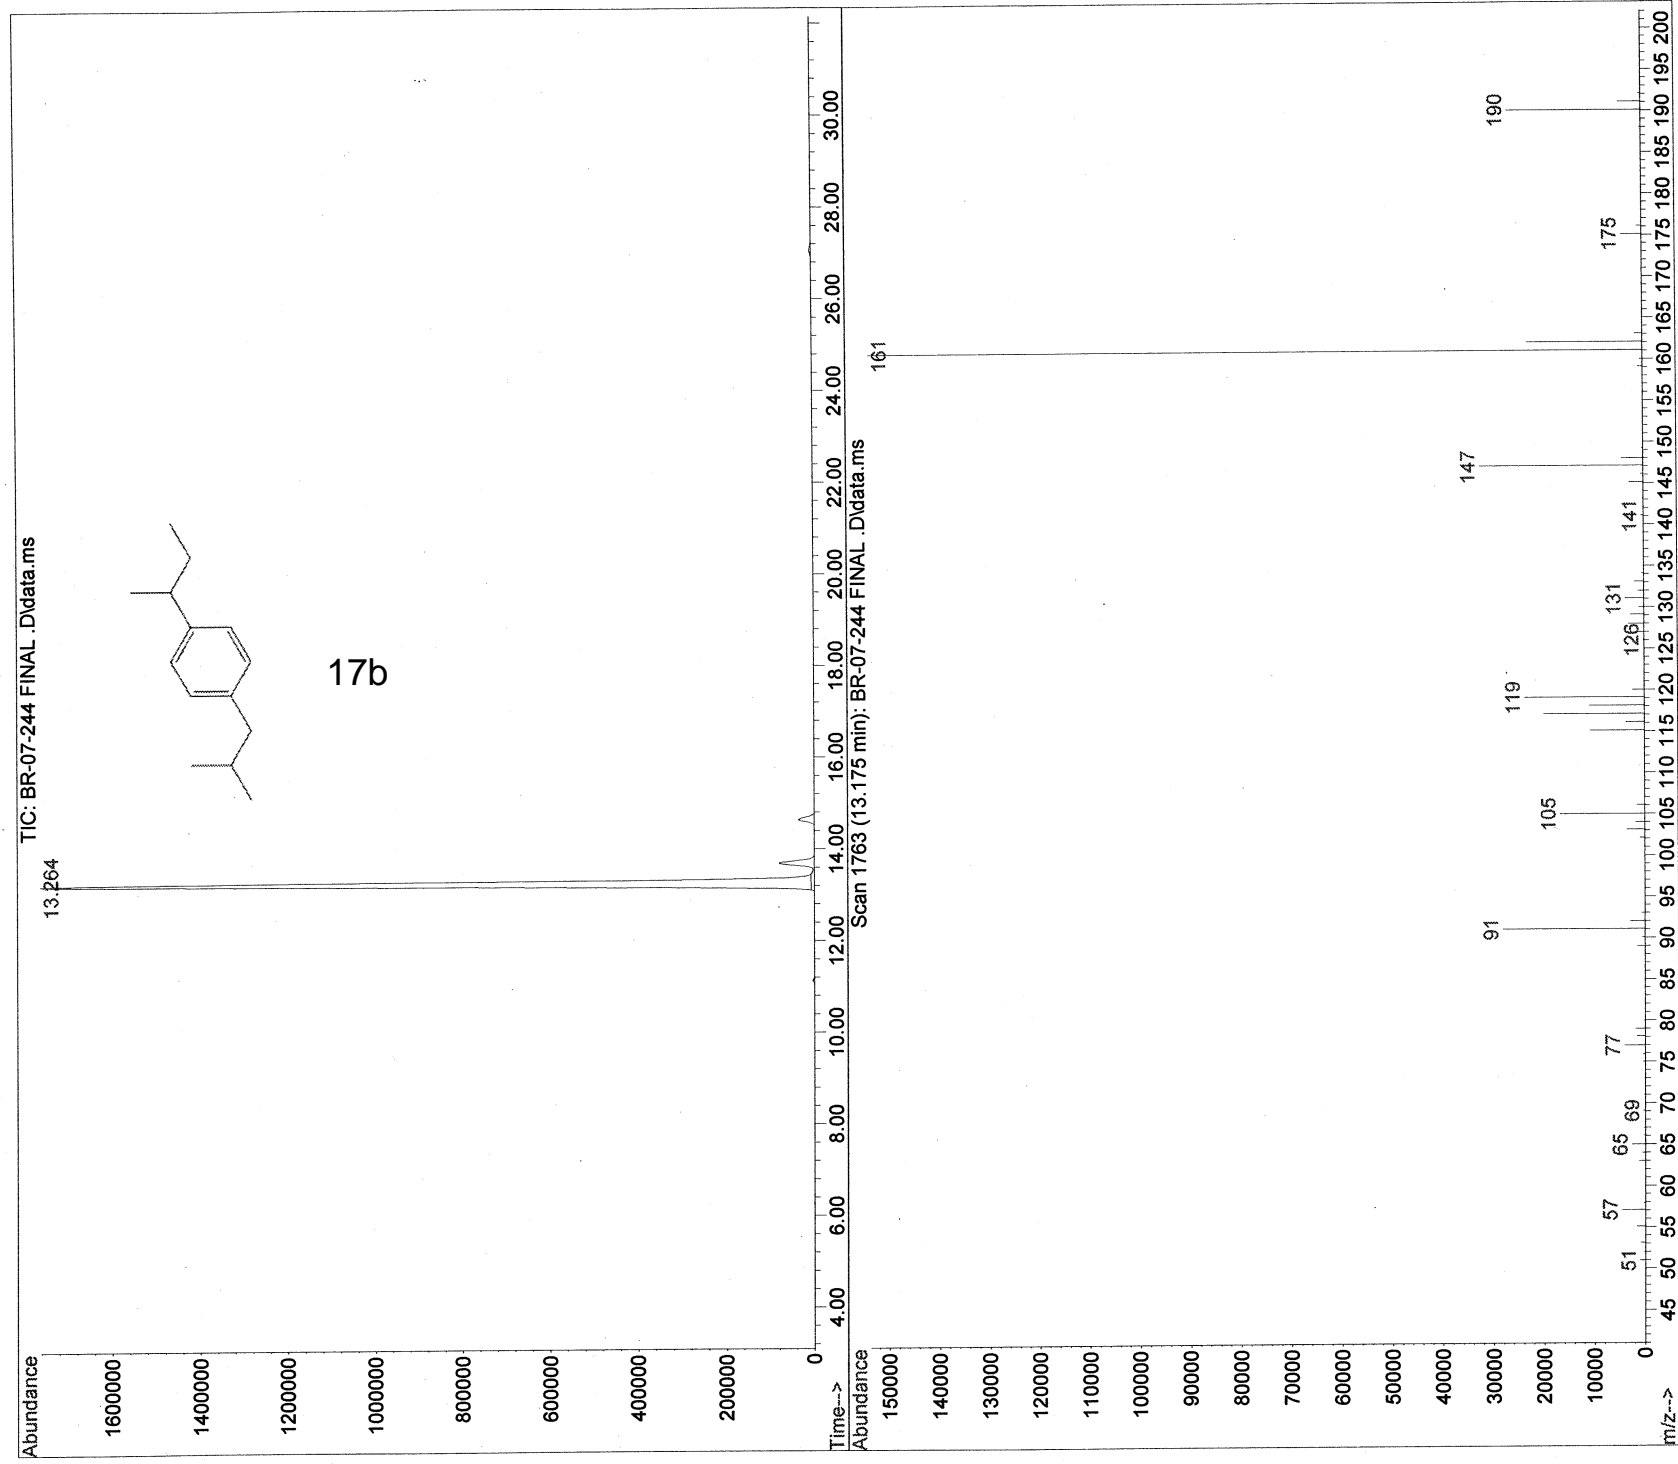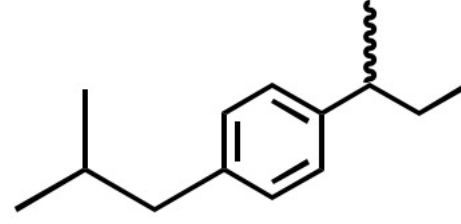

7.257  
7.146  
7.128  
7.122  
7.114  
7.107  
7.100  
7.093  
7.085  
7.079

2.624  
2.607  
2.589  
2.572  
2.486  
2.468  
1.936  
1.919  
1.902  
1.885  
1.868  
1.851  
1.834  
1.655  
1.650  
1.637  
1.631  
1.618  
1.613  
1.599  
1.595  
1.581  
1.578  
1.271  
1.254  
1.246  
0.946  
0.930

Faculty Group Rajanbabu987  
PROTON\_OSU CDC13 {C:\Bruker\TopSpin3.0} raya.5 1

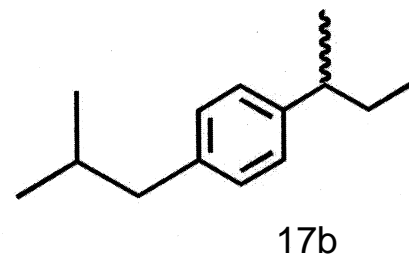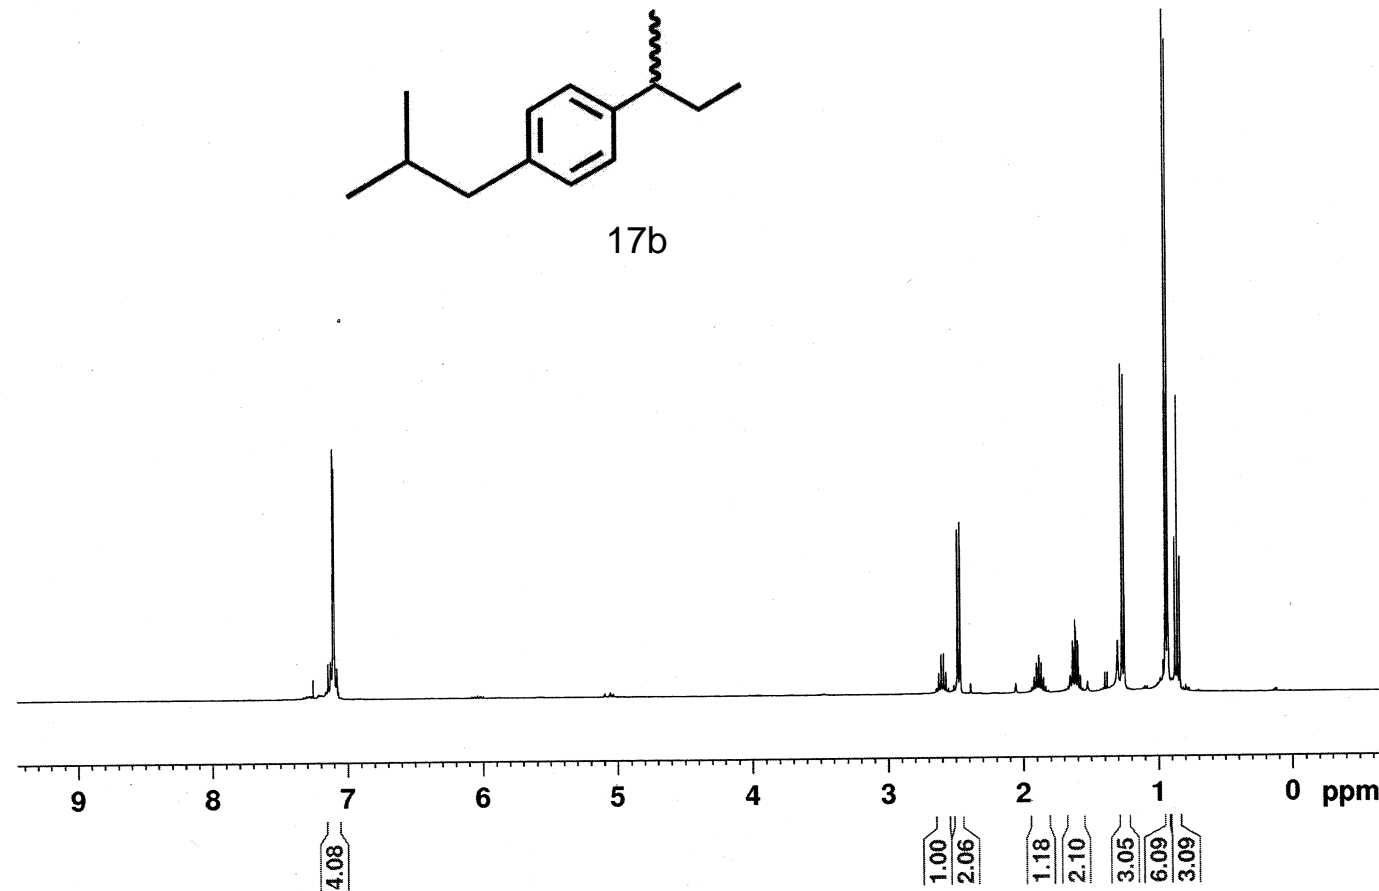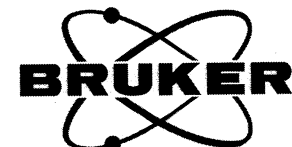

Current Data Parameters  
NAME BR-07-244  
EXPNO 1  
PROCNO 1

F2 - Acquisition Parameters  
Date\_ 20150911  
Time 23.26  
INSTRUM spect  
PROBHD 5 mm PABBO BB/  
PULPROG zg30  
TD 65536  
SOLVENT CDC13  
NS 64  
DS 2  
SWH 8223.685 Hz  
FIDRES 0.125483 Hz  
AQ 3.9845889 sec  
RG 32.11  
DW 60.800 usec  
DE 6.50 usec  
TE 300.0 K  
D1 1.00000000 sec  
TD0 1

===== CHANNEL f1 =====  
SF01 400.1724712 MHz  
NUC1 1H  
P1 15.00 usec  
PLW1 13.19999981 W

F2 - Processing parameters  
SI 65536  
SF 400.1700108 MHz  
WDW EM  
SSB 0  
LB 0.30 Hz  
GB 0  
PC 1.00

145.19  
139.28  
129.25  
127.02

77.64  
77.32  
77.00

45.41  
41.57  
31.58  
30.56  
22.75  
22.12  
12.58

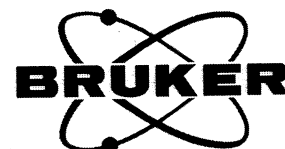

Faculty Group Rajanbabu987  
C13CPD CDC13 {C:\Bruker\TopSpin3.0} raya.5 1

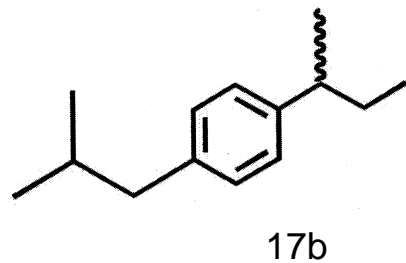

Current Data Parameters  
NAME BR-07-244  
EXPNO 2  
PROCNO 1

F2 - Acquisition Parameters  
Date\_ 20150912  
Time 1.26  
INSTRUM spect  
PROBHD 5 mm PABBO BB/  
PULPROG zgpg30  
TD 65536  
SOLVENT CDC13  
NS 2048  
DS 4  
SWH 24038.461 Hz  
FIDRES 0.366798 Hz  
AQ 1.3631488 sec  
RG 1030  
DW 20.800 usec  
DE 6.50 usec  
TE 300.0 K  
D1 2.00000000 sec  
D11 0.03000000 sec  
TD0 1

===== CHANNEL f1 =====  
SFO1 100.6328883 MHz  
NUC1 13C  
P1 9.50 usec  
PLW1 53.29999924 W

===== CHANNEL f2 =====  
SFO2 400.1716007 MHz  
NUC2 1H  
CPDPRG[2] waltz16  
PCPD2 80.00 usec  
PLW2 14.60000038 W  
PLW12 0.51327997 W  
PLW13 0.32850000 W

F2 - Processing parameters  
SI 32768  
SF 100.6227979 MHz  
WDW EM  
SSB 0  
LB 1.00 Hz  
GB 0  
PC 1.40

200 180 160 140 120 100 80 60 40 20 ppm

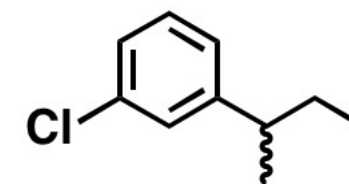

BQ-07-246  
100% B0/murn

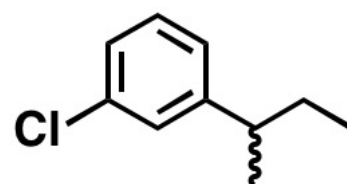

17a

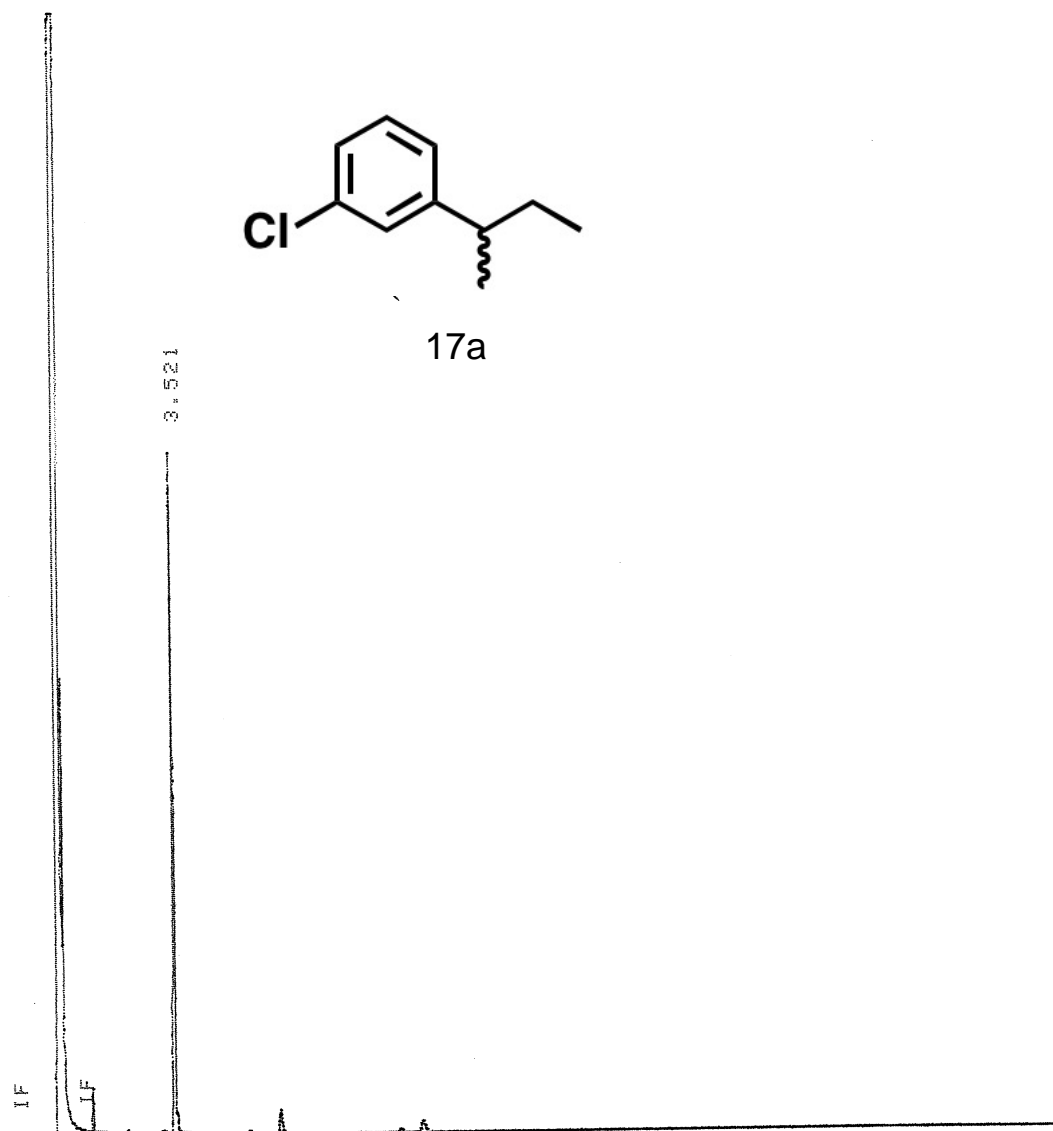

\* BREAK  
\* BREAK  
\* BREAK  
\* BREAK  
\* BREAK

\*AN  
RUN # 2246 OCT 1, 1901 23:41:50  
START

STOP

Error storing signal to M:SIGNAL .BNA  
DIRECTORY FULL  
Storing processed peaks to M:SIGNAL .PRA

RUN# 2246 OCT 1, 1901 23:41:50

PEAK FILE : M:SIGNAL.PRA  
AREA% RT AREA TYPE WIDTH AREA%  
3.521 1474335 SBB .039 100.00000

TOTAL AREA=1474335  
MUL FACTOR=1.0000E+00

File : D:\MSDCHEMData\Babu\Balaram\BR-07-246 FINAL.D  
Operator : BALARAM  
Acquired : 22 Sep 2015 20:07 using AcqMethod 100-ISOTHERM.M  
Instrument : GCMS  
Sample Name : BR-07-246 Final  
Misc Info :  
Vial Number : 1

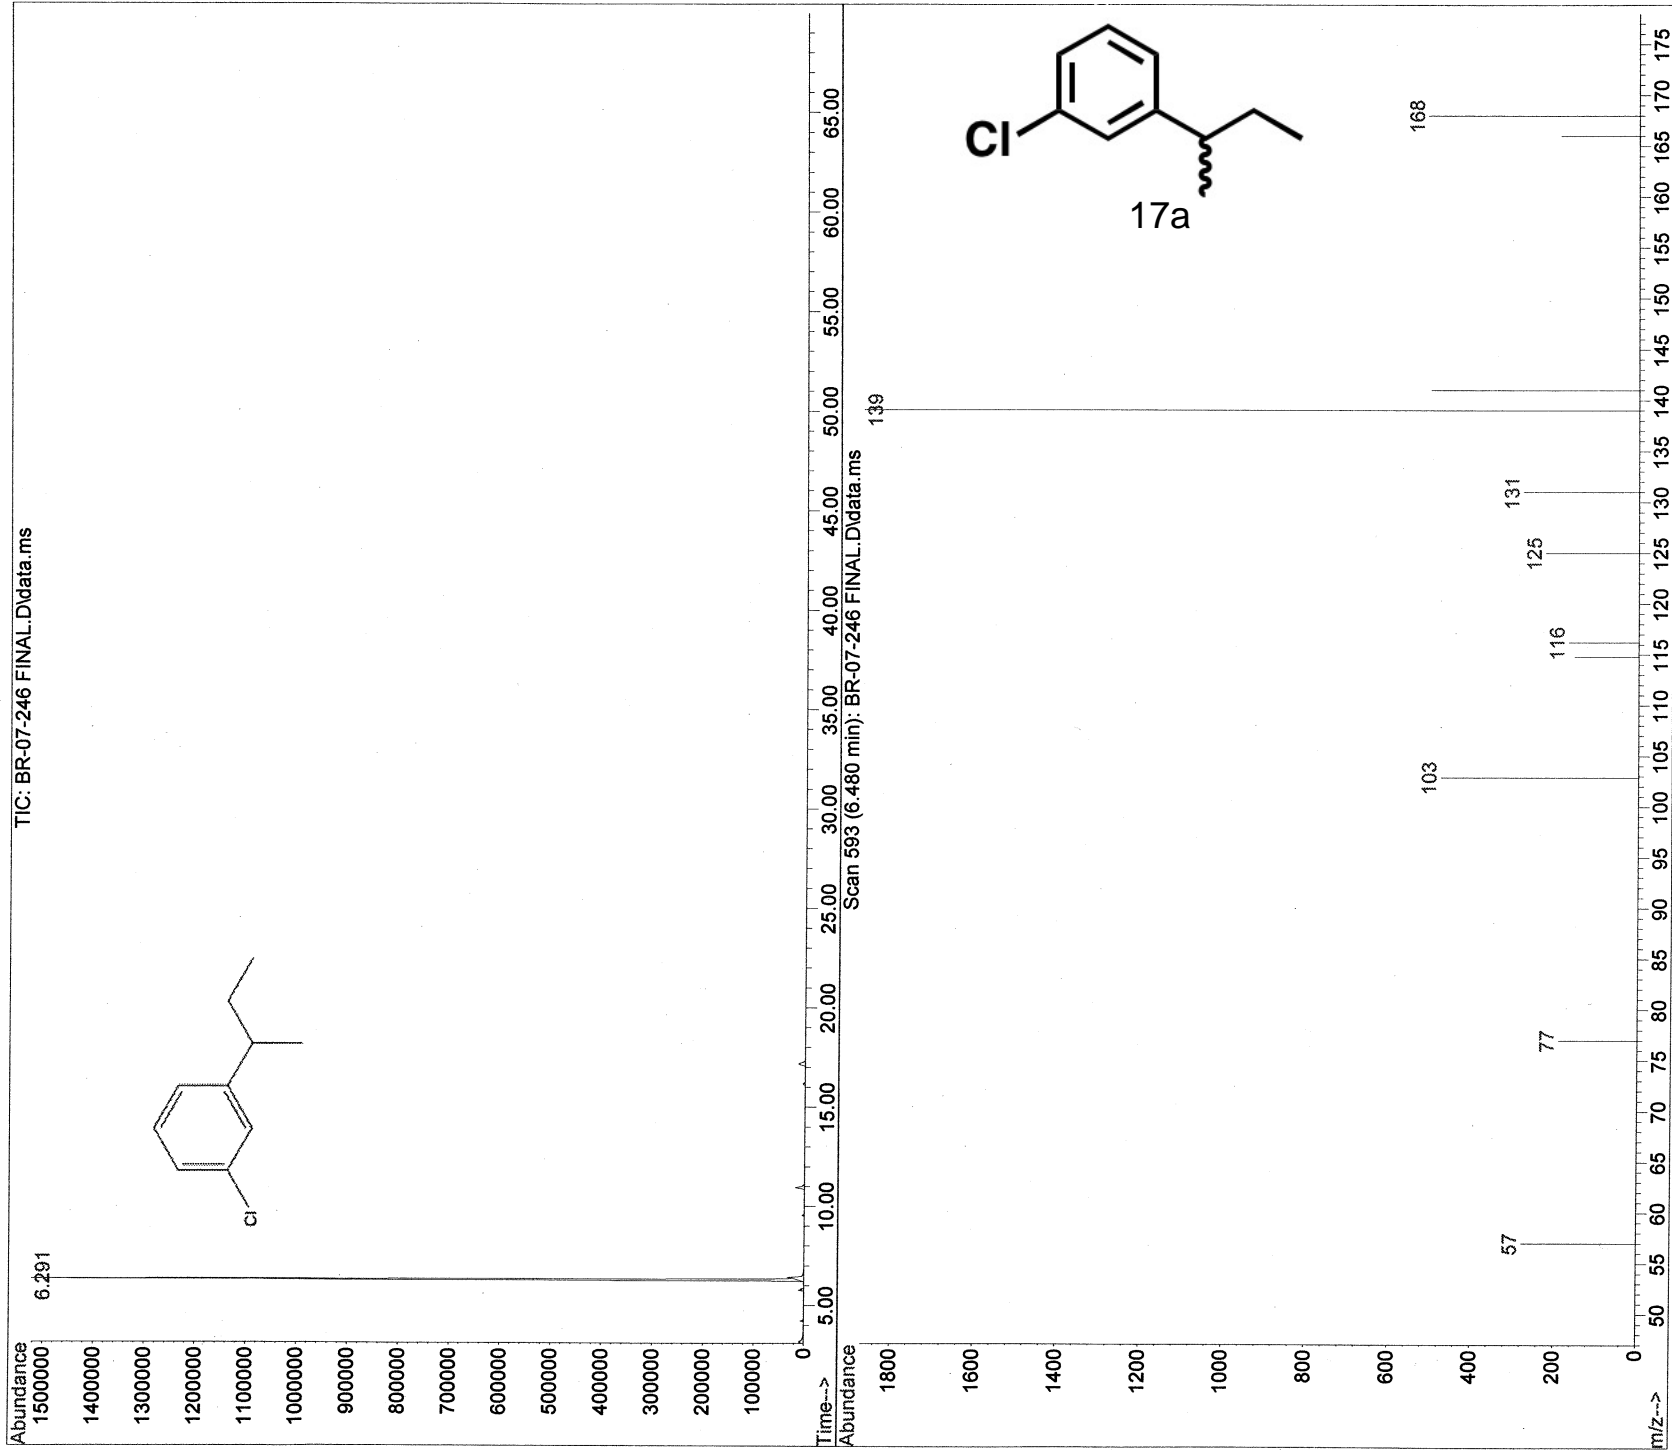

7.263  
7.257  
7.245  
7.235  
7.233  
7.217  
7.215  
7.198  
7.196  
7.192  
7.172  
7.171  
7.169  
7.153  
7.150  
7.148  
7.145  
7.073  
7.069  
7.067  
7.066  
7.055  
7.051  
7.048  
7.047

2.627  
2.609  
2.591  
2.573  
2.556  
2.538  
2.365  
1.628  
1.610  
1.591  
1.573  
1.555  
1.287  
1.272  
1.242  
1.224  
0.914  
0.897  
0.889  
0.879  
0.870  
0.865  
0.860  
0.849  
0.830  
0.812

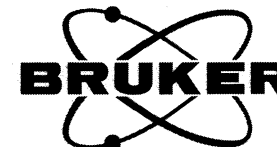

Current Data Parameters  
NAME BR-07-246  
EXPNO 1  
PROCNO 1

Faculty Group Rajanbabu987  
PROTON\_OSU CDC13 {C:\Bruker\TopSpin3.0} raya.5 44

F2 - Acquisition Parameters  
Date\_ 20150912  
Time 1.35  
INSTRUM spect  
PROBHD 5 mm PABBO BB/  
PULPROG zg30  
TD 65536  
SOLVENT CDC13  
NS 64  
DS 2  
SWH 8223.685 Hz  
FIDRES 0.125483 Hz  
AQ 3.9845889 sec  
RG 61.71  
DW 60.800 usec  
DE 6.50 usec  
TE 300.0 K  
D1 1.00000000 sec  
TDO 1

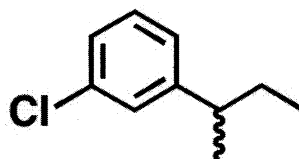

===== CHANNEL f1 =====  
SFO1 400.1724712 MHz  
NUC1 1H  
P1 15.00 usec  
PLW1 13.19999981 W

F2 - Processing parameters  
SI 65536  
SF 400.1700112 MHz  
WDW EM  
SSB 0  
LB 0.30 Hz  
GB 0  
PC 1.00

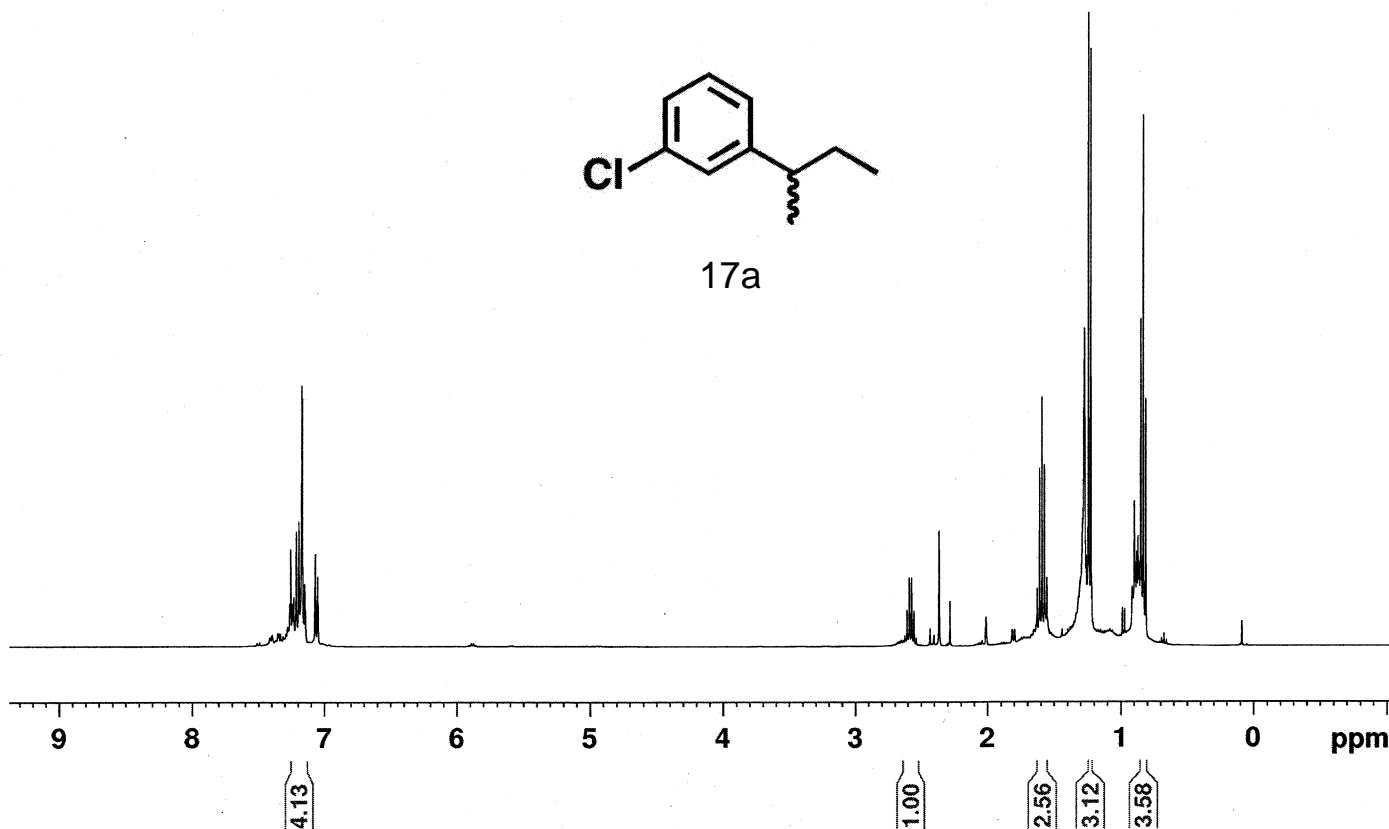

— 149.98  
 — 134.24  
 — 129.68  
 — 127.40  
 — 126.14  
 — 125.53

— 77.52  
 — 77.21  
 — 76.89

— 41.74  
 — 31.20  
 — 21.86  
 — 12.33

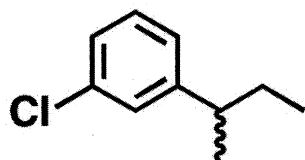

17a

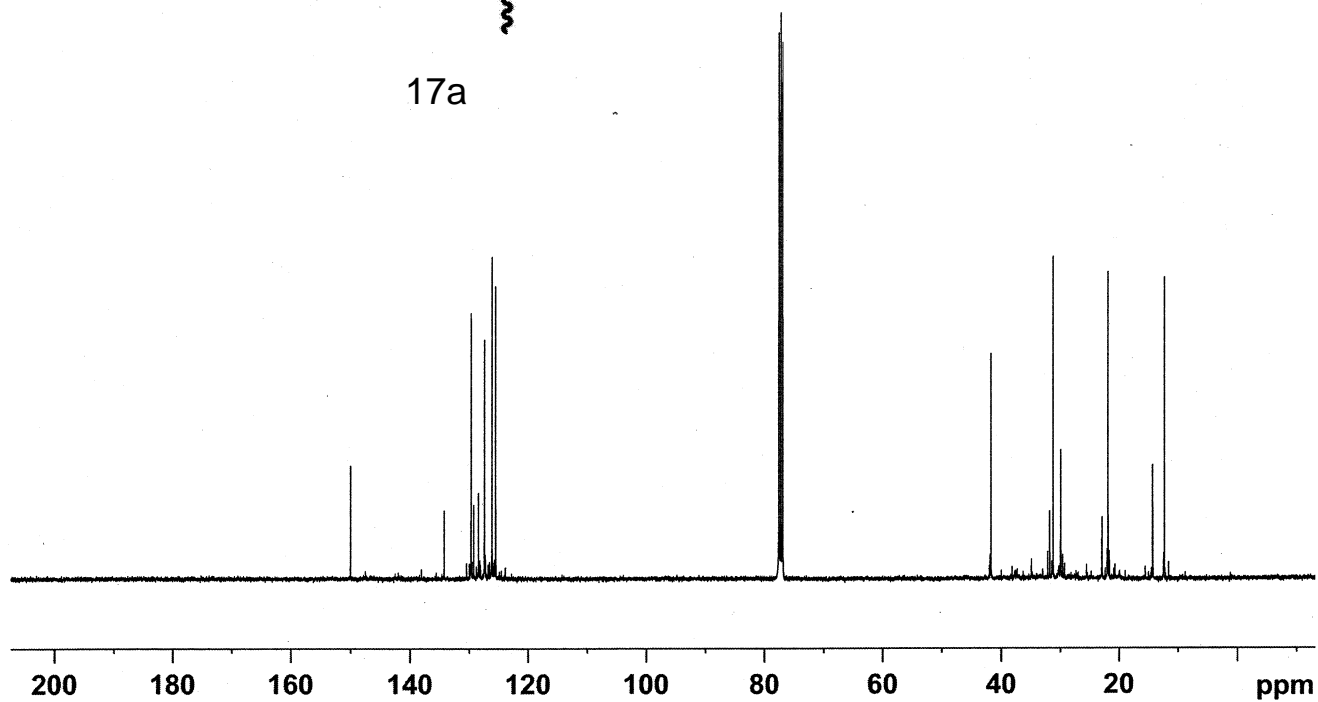

Current Data Parameters  
 NAME BR-07-246  
 EXPNO 2  
 PROCNO 1

F2 - Acquisition Parameters  
 Date\_ 20150912  
 Time\_ 3.35  
 INSTRUM spect  
 PROBHD 5 mm PABBO BB/  
 PULPROG zgpg30  
 TD 65536  
 SOLVENT CDCl3  
 NS 2048  
 DS 4  
 SWH 24038.461 Hz  
 FIDRES 0.366798 Hz  
 AQ 1.3631488 sec  
 RG 2050  
 DW 20.800 usec  
 DE 6.50 usec  
 TE 300.0 K  
 D1 2.0000000 sec  
 D11 0.0300000 sec  
 TD0 1

===== CHANNEL f1 =====  
 SFO1 100.6328883 MHz  
 NUC1 13C  
 P1 9.50 usec  
 PLW1 53.29999924 W

===== CHANNEL f2 =====  
 SFO2 400.1716007 MHz  
 NUC2 1H  
 CPDPRG[2] waltz16  
 PCPD2 80.00 usec  
 PLW2 14.60000038 W  
 PLW12 0.51327997 W  
 PLW13 0.32850000 W

F2 - Processing parameters  
 SI 32768  
 SF 100.6228079 MHz  
 WDW EM  
 SSB 0  
 LB 1.00 Hz  
 GB 0  
 PC 1.40

\*  
\*  
\*  
\*  
\*  
\*  
\*  
\*  
\*  
\*  
\*  
\*  
\*  
\*  
\*  
\*  
\*  
\*  
\*  
\*  
\*

\*AM

RUN # 2251 OCT 2, 1981 16:52:02

START

IF

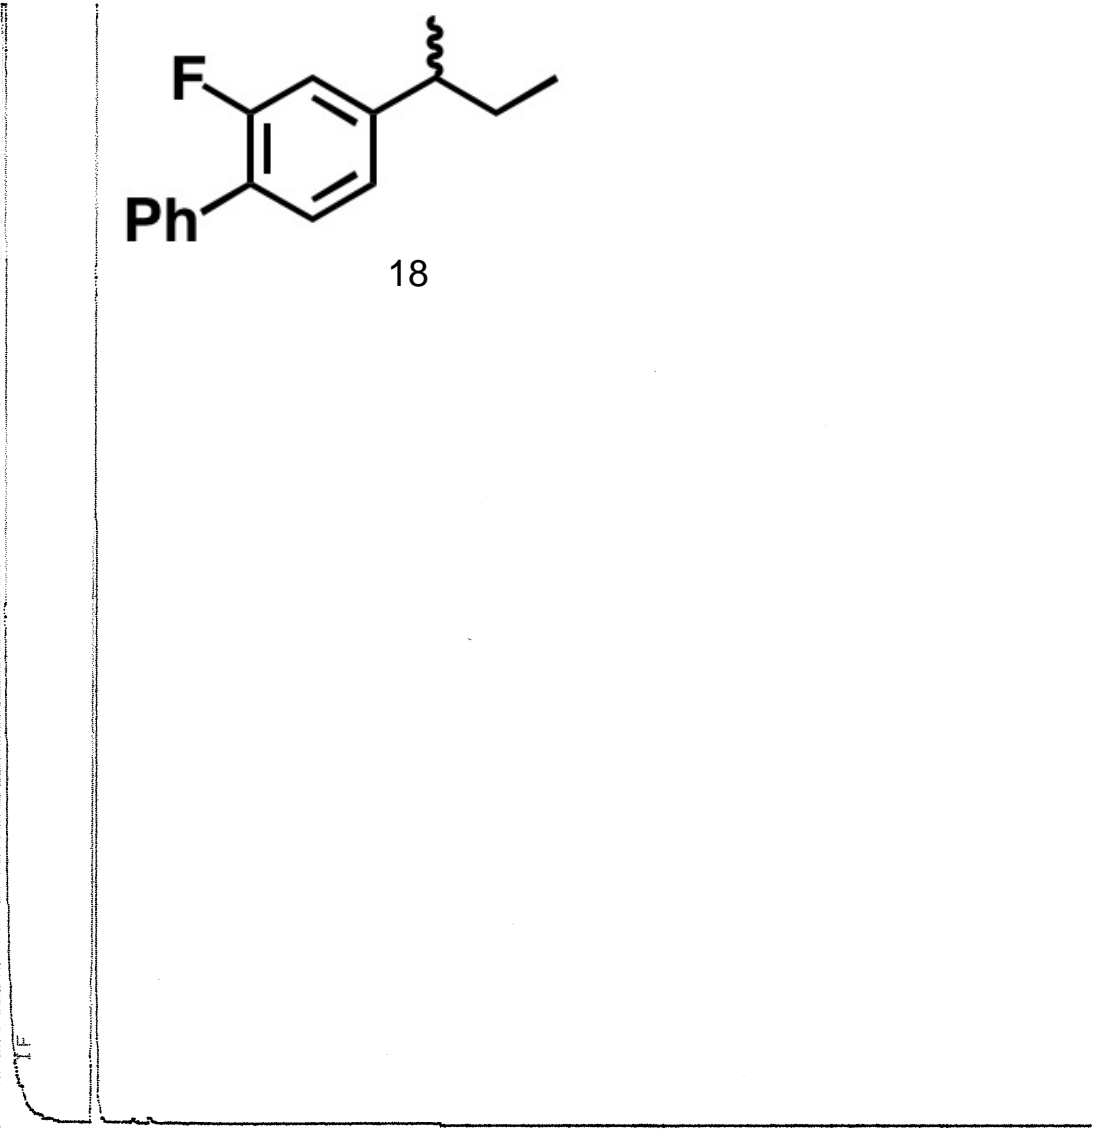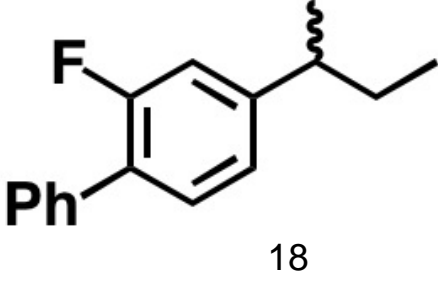

STOP

Error storing signal to M: SIGNAL .BNA  
DIRECTORY FULL

Storing processed peaks to M: SIGNAL .PCP

RUN# 2251 OCT 2, 1981 16:52:02

PEAK FILE : M: SIGNAL .PRA

AREA#

RT AREA TYPE WIDTH AREA#

1.10 0.0000 0.00 0.00 0.00

BR-07-2  
180'C/13



File :D:\MSDCHEMData\Babu\Balaram\BR-07-245 FINAL .D  
Operator : BALARAM  
Acquired : 23 Sep 2015 11:43 using AcqMethod 180-ISOTHERM.M  
Instrument : GCMS  
Sample Name: BR-07-245 FINAL  
Misc Info :  
Vial Number: 1

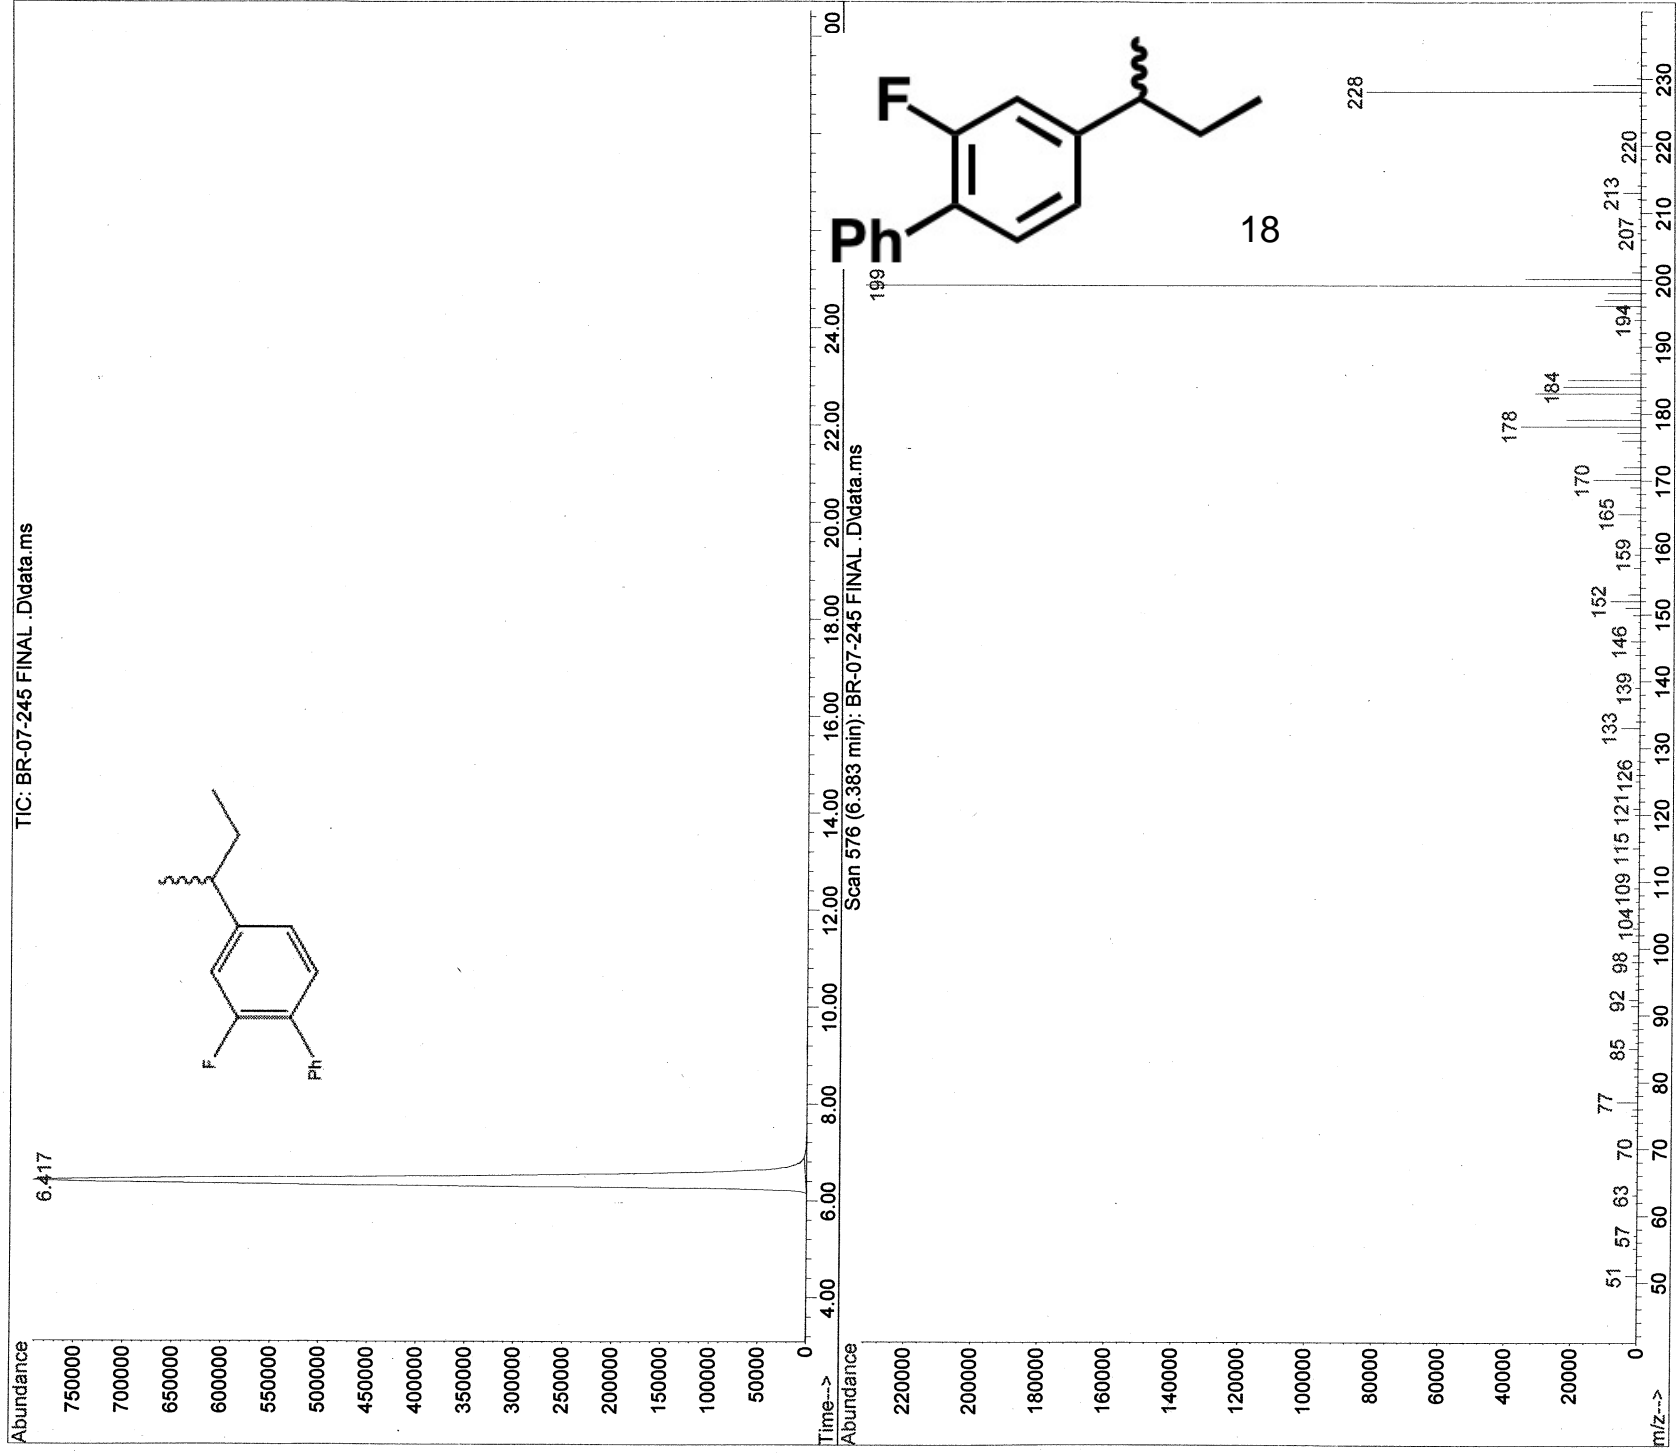

7.600  
7.597  
7.593  
7.588  
7.579  
7.578  
7.576  
7.572  
7.482  
7.479  
7.475  
7.461  
7.458  
7.446  
7.442  
7.406  
7.395  
7.392  
7.386  
7.379  
7.373  
7.366  
7.355  
7.257  
7.072  
7.068  
7.053  
7.048  
7.031  
7.027  
7.001  
6.997  
2.680  
2.662  
2.645  
1.696  
1.694  
1.678  
1.659  
1.640  
1.622  
1.309  
1.292  
0.923  
0.905  
0.886

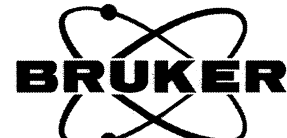

Current Data Parameters  
 NAME BR-07-245  
 EXPNO 1  
 PROCNO 1

Faculty Group Rajanbabu987  
 PROTON\_OSU CDC13 {C:\Bruker\TopSpin3.0} raya.5 26

F2 - Acquisition Parameters  
 Date\_ 20150911  
 Time 21.12  
 INSTRUM spect  
 PROBHD 5 mm PABBO BB/  
 PULPROG zg30  
 TD 65536  
 SOLVENT CDC13  
 NS 64  
 DS 2  
 SWH 8223.685 Hz  
 FIDRES 0.125483 Hz  
 AQ 3.9845889 sec  
 RG 32.11  
 DW 60.800 usec  
 DE 6.50 usec  
 TE 300.0 K  
 D1 1.00000000 sec  
 TD0 1

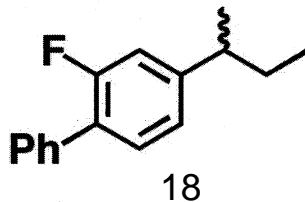

===== CHANNEL f1 =====  
 SFO1 400.1724712 MHz  
 NUC1 1H  
 P1 15.00 usec  
 PLW1 13.19999981 W

F2 - Processing parameters  
 SI 65536  
 SF 400.1700110 MHz  
 WDW EM  
 SSB 0  
 LB 0.30 Hz  
 GB 0  
 PC 1.00

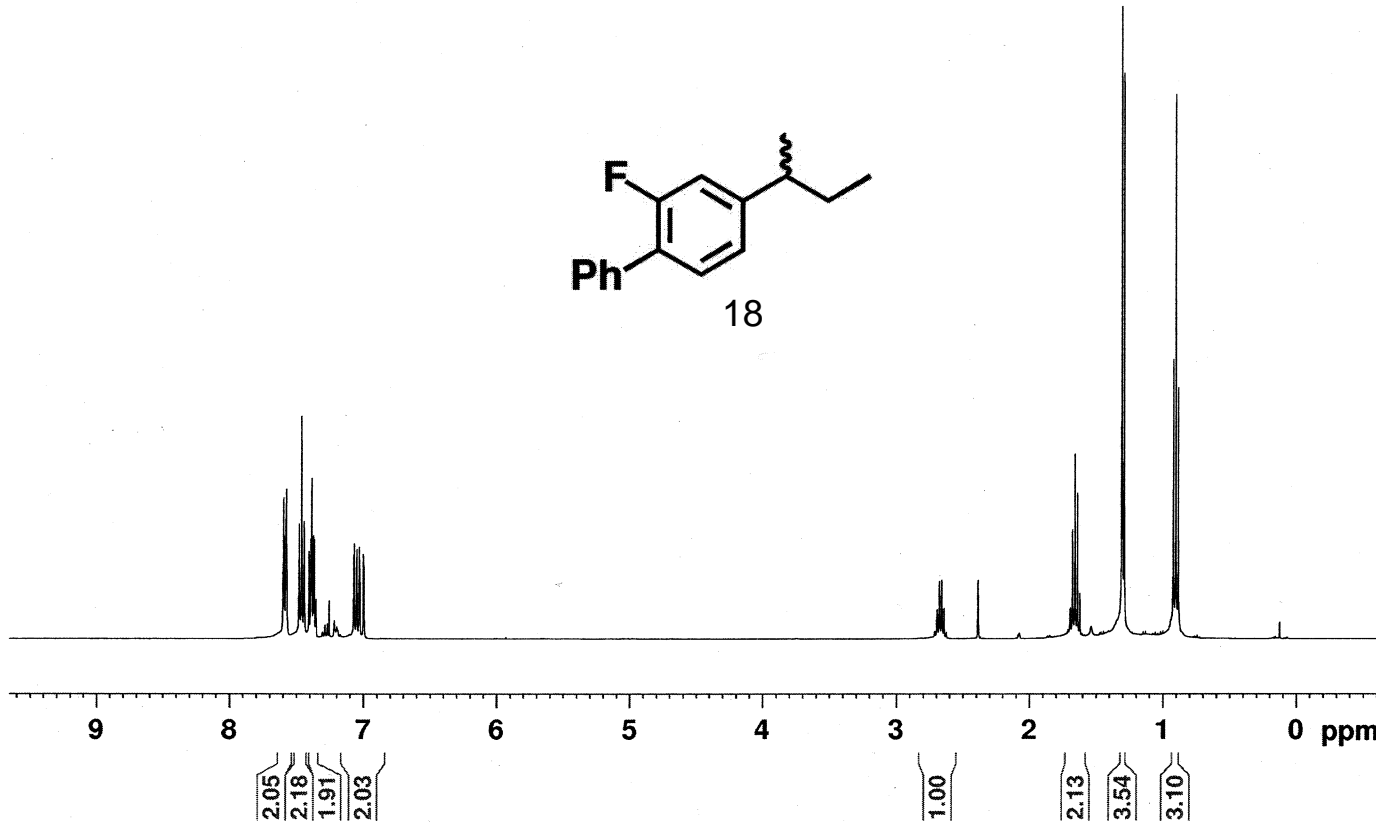

161.16  
158.70  
149.63  
136.15  
130.54  
129.09  
128.52  
127.50  
123.25  
114.50

77.48  
77.17  
76.85

41.43  
31.17  
21.80  
12.32

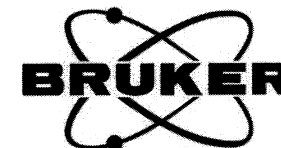

Faculty Group Rajanbabu987  
C13CPD CDC13 {C:\Bruker\TopSpin3.0} raya.5 26

Current data parameters  
NAME BR-07-245  
EXPNO 2  
PROCNO 1

F2 - Acquisition Parameters  
Date\_ 20150911  
Time\_ 23.12  
INSTRUM spect  
PROBHD 5 mm PABBO BB/  
PULPROG zgpg30  
TD 65536  
SOLVENT CDC13  
NS 2048  
DS 4  
SWH 24038.461 Hz  
FIDRES 0.366798 Hz  
AQ 1.3631488 sec  
RG 1030  
DW 20.800 usec  
DE 6.50 usec  
TE 300.4 K  
D1 2.00000000 sec  
D11 0.03000000 sec  
TDO 1

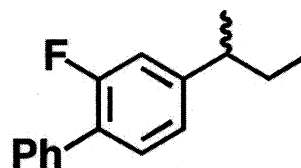

18

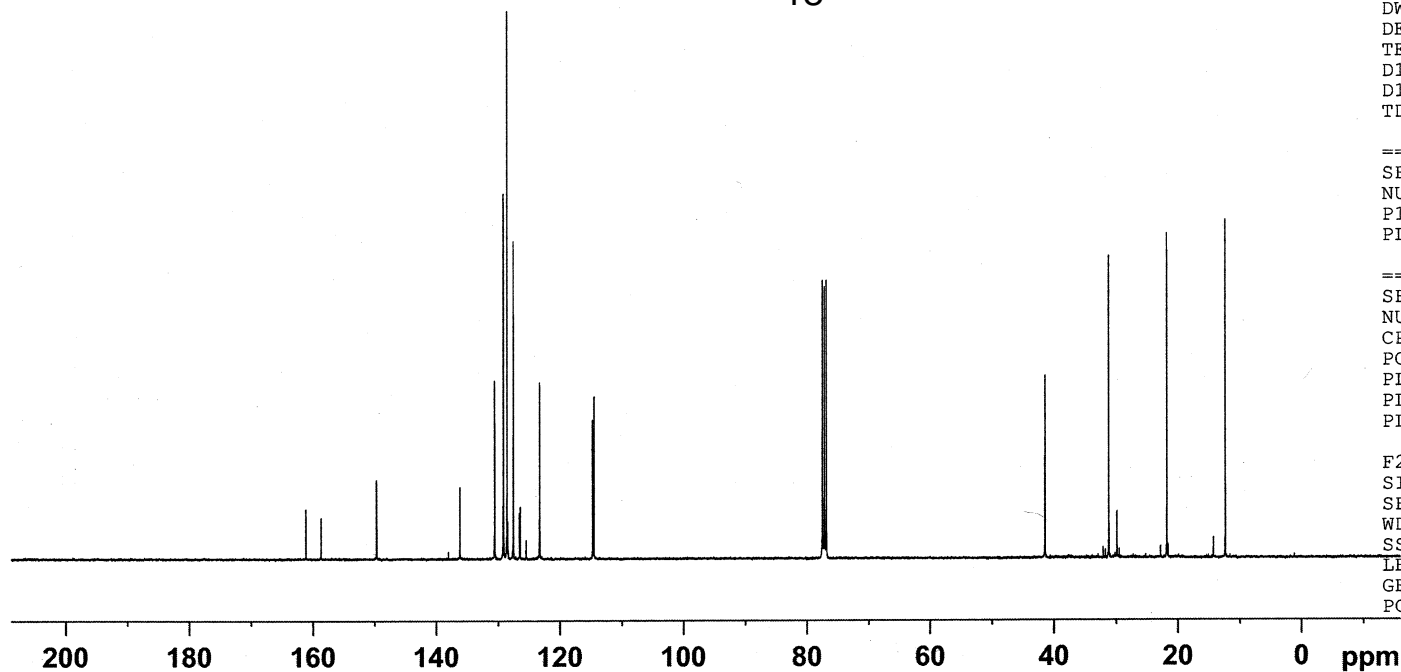

==== CHANNEL f1 =====  
SFO1 100.6328883 MHz  
NUC1 13C  
P1 9.50 usec  
PLW1 53.29999924 W

==== CHANNEL f2 =====  
SFO2 400.1716007 MHz  
NUC2 1H  
CPDPRG[2] waltz16  
PCPD2 80.00 usec  
PLW2 14.60000038 W  
PLW12 0.51327997 W  
PLW13 0.32850000 W

F2 - Processing parameters  
SI 32768  
SF 100.6228150 MHz  
WDW EM  
SSB 0  
LB 1.00 Hz  
GB 0  
PC 1.40

BR-  
50

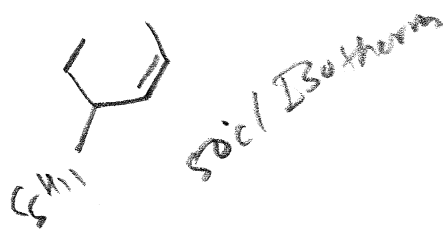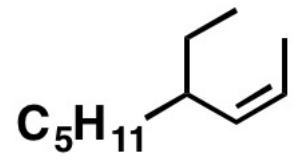

31

BREAK  
\*  
BREAK  
\*  
BREAK  
\*  
BREAK  
\*  
BREAK  
\*  
BREAK

\*AN  
RUN # 2116 SEP 13, 1981 22:36:45  
START

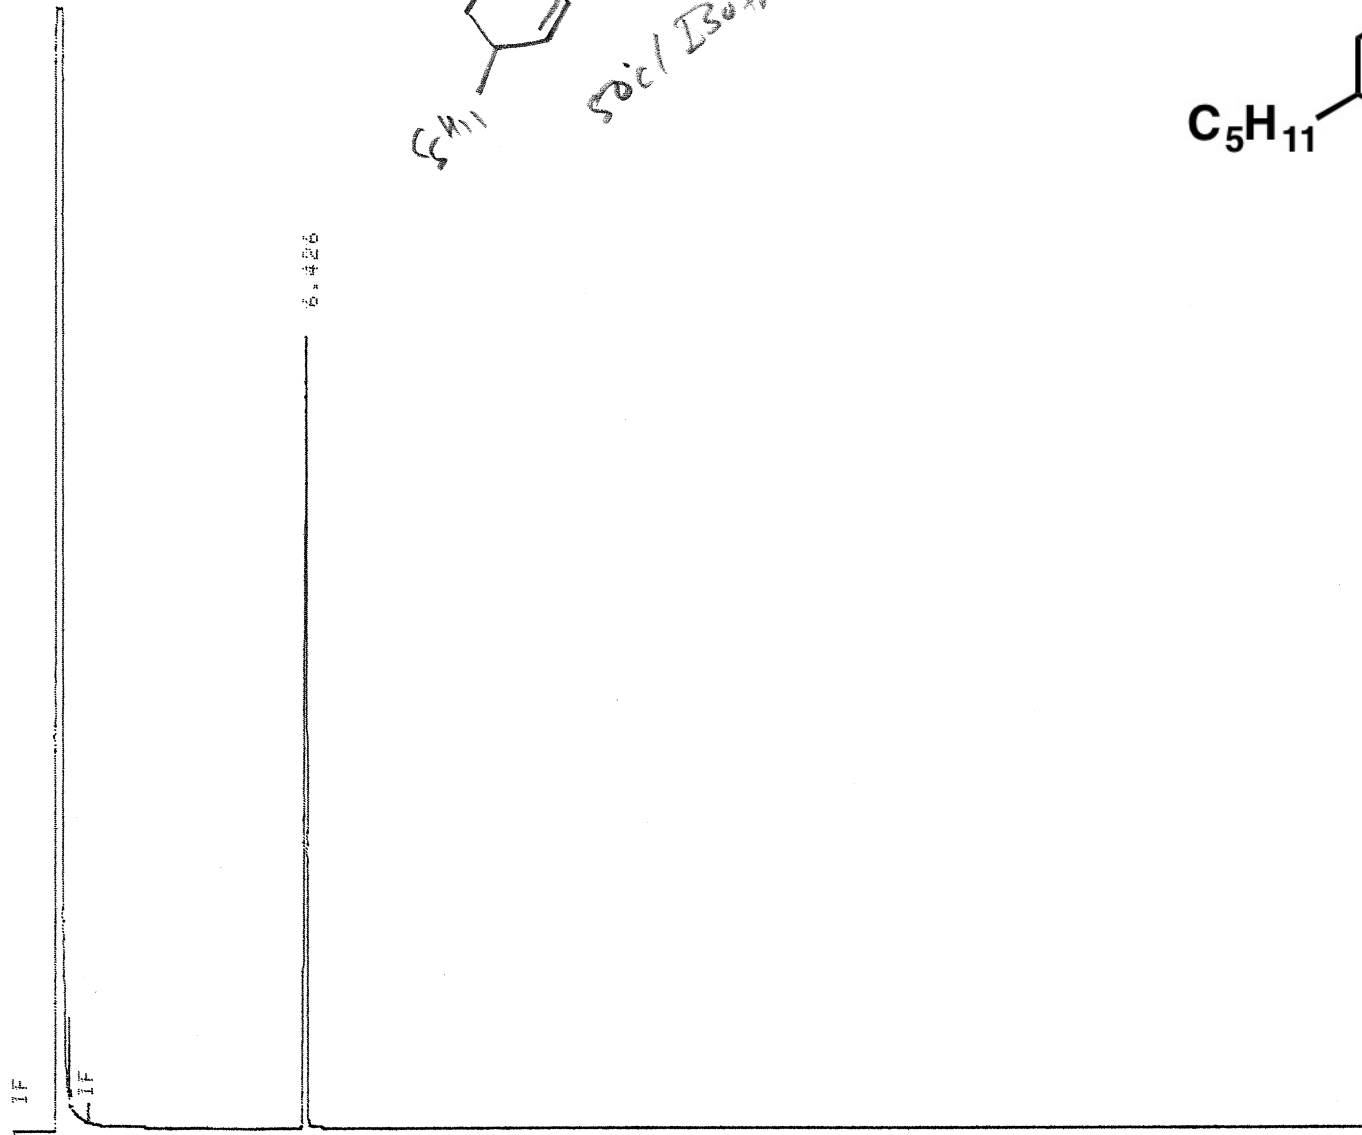

IF

-IF

6.426

STOP

Error storing signal to M:SIGNAL .BNA  
DIRECTORY FULL  
Storing processed peaks to M:SIGNAL .PRA

File : D:\MSDCHEMData\Babu\Balararam\BR-07-213 REPEAT .D  
Operator : BALARAM  
Acquired : 31 Jul 2015 13:15 using AcqMethod 50-ISOTHERM.M  
Instrument : GCMS  
Sample Name: BR-07-213 REPEAT  
Misc Info :  
Vial Number: 1

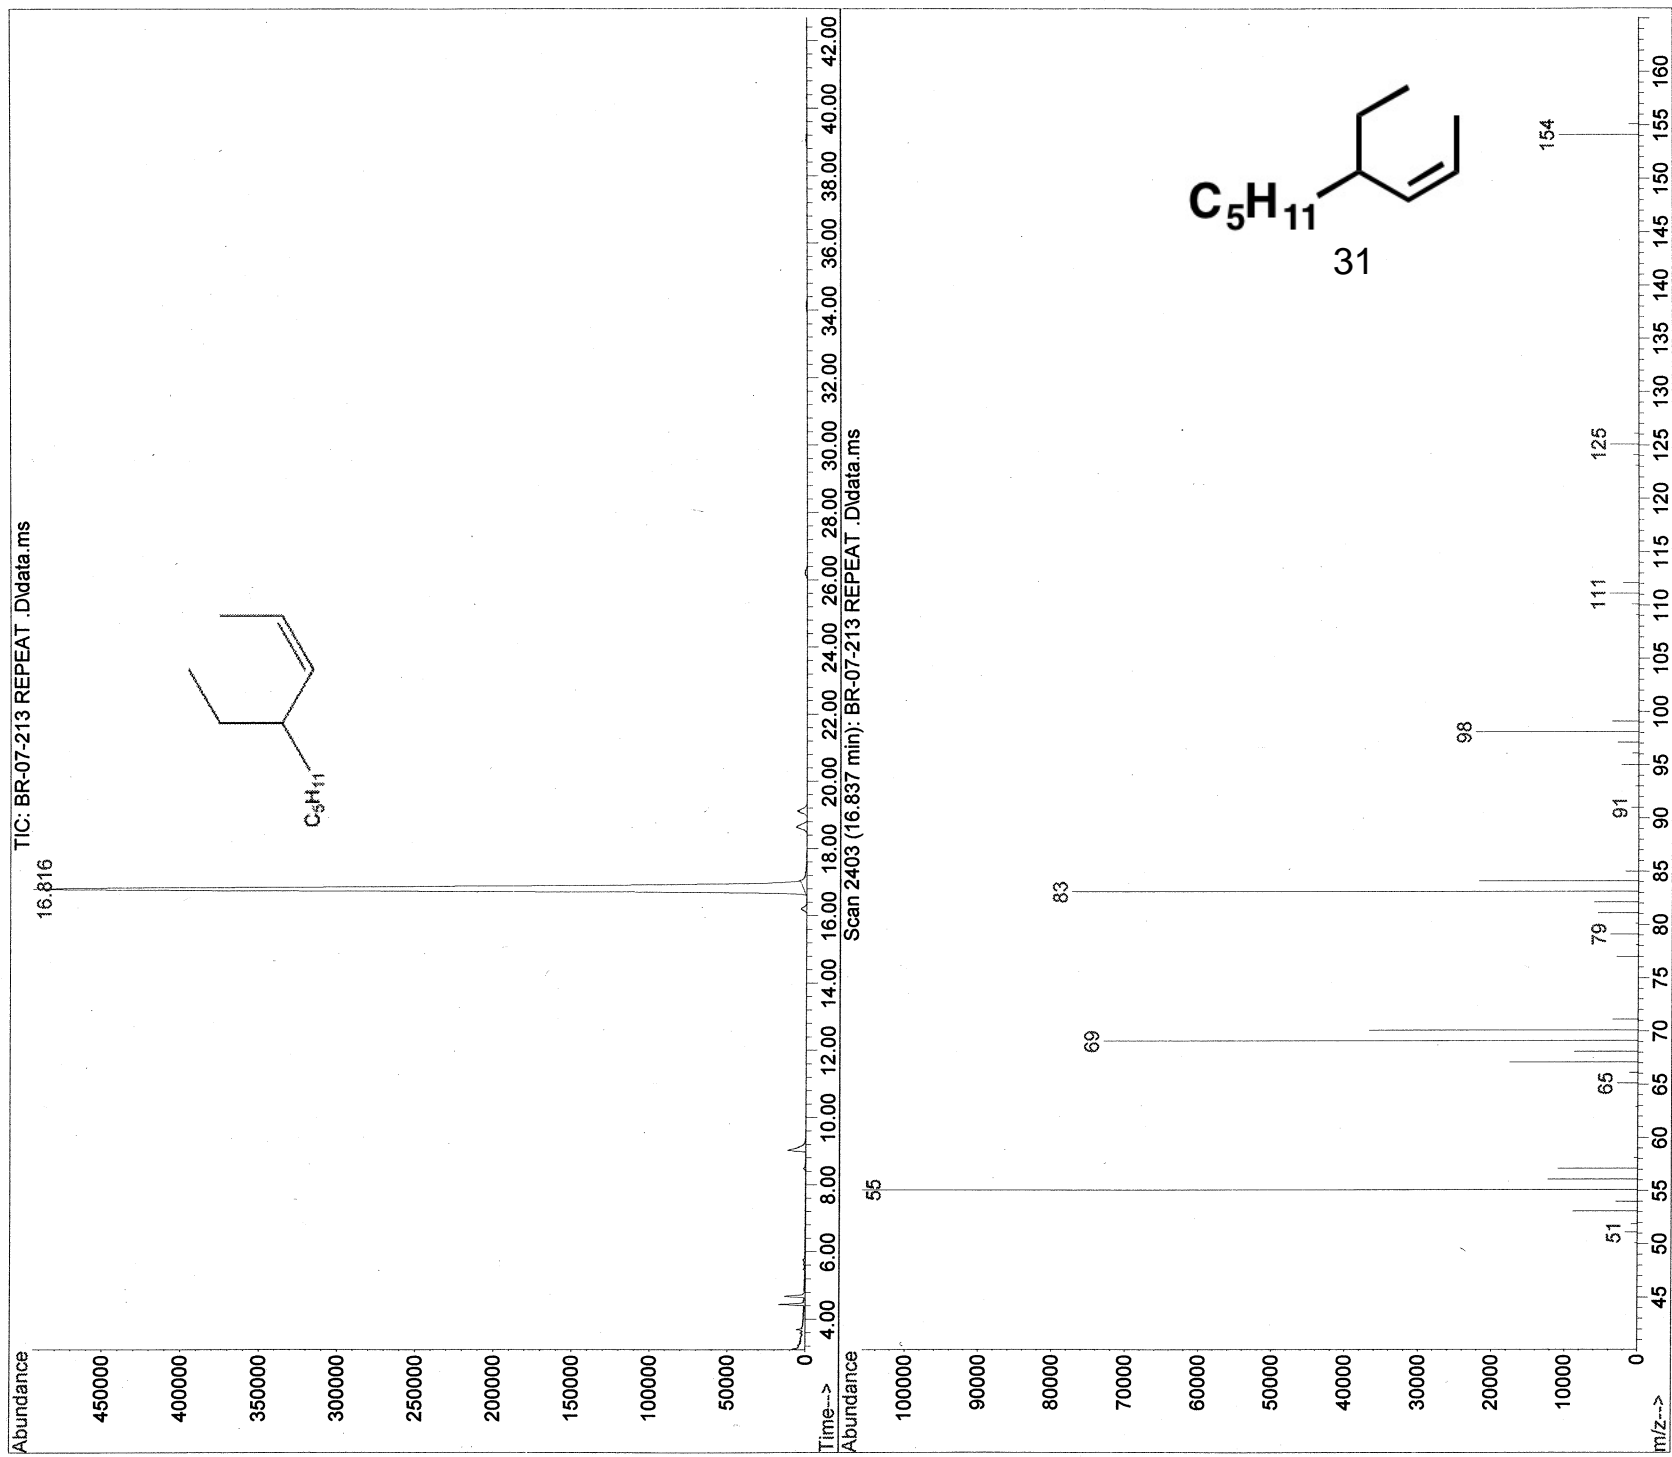

Faculty Group Rajanbabu987  
 PROTON\_OSU CDC13 {C:\Bruker\TopSpin3.0} raya.5 26

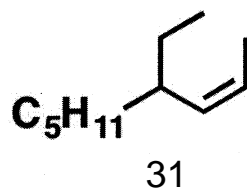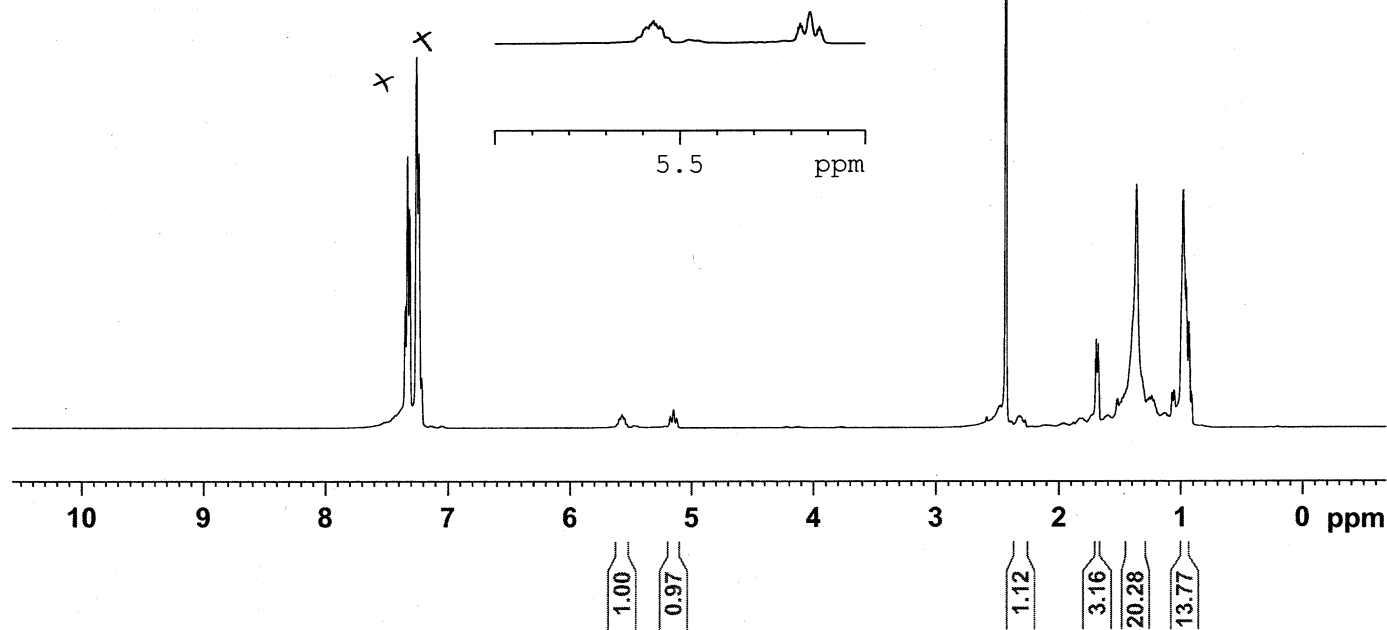

7.350  
7.347  
7.330  
7.314  
7.310  
7.256  
7.240  
7.238  
5.591  
5.572  
5.565  
5.555  
5.180  
5.176  
5.171  
5.149  
5.128  
5.123  
2.433  
2.431  
1.700  
1.696  
1.691  
1.683  
1.679  
1.674  
1.472  
1.364  
1.282  
1.259  
1.241  
1.221  
1.074  
1.069  
1.057  
1.052  
0.983  
0.978  
0.975  
0.961  
0.956  
0.951

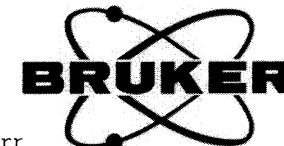

Curr  
 NAME BR-07-213 Rerun  
 EXPNO 1  
 PROCNO 1

F2 - Acquisition Parameters  
 Date 20150801  
 Time 19.35  
 INSTRUM spect  
 PROBHD 5 mm PABBO BB/  
 PULPROG zg30  
 TD 65536  
 SOLVENT CDC13  
 NS 64  
 DS 2  
 SWH 8223.685 Hz  
 FIDRES 0.125483 Hz  
 AQ 3.9845889 sec  
 RG 32.11  
 DW 60.800 usec  
 DE 6.50 usec  
 TE 300.0 K  
 D1 1.00000000 sec  
 TD0 1

==== CHANNEL f1 =====  
 SFO1 400.1724712 MHz  
 NUC1 1H  
 P1 15.00 usec  
 PLW1 13.19999981 W

F2 - Processing parameters  
 SI 65536  
 SF 400.1700138 MHz  
 WDW EM  
 SSB 0  
 LB 0.30 Hz  
 GB 0  
 PC 1.00

X = Toluene

138.12 X  
136.20  
129.32 X  
128.51 X  
125.60 X  
123.69

77.61  
77.29  
76.97

38.80  
35.92  
32.46  
31.91  
28.92  
27.34  
22.97  
21.70 X  
14.38  
12.05

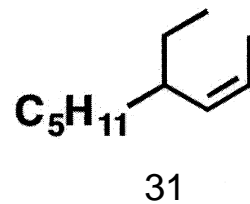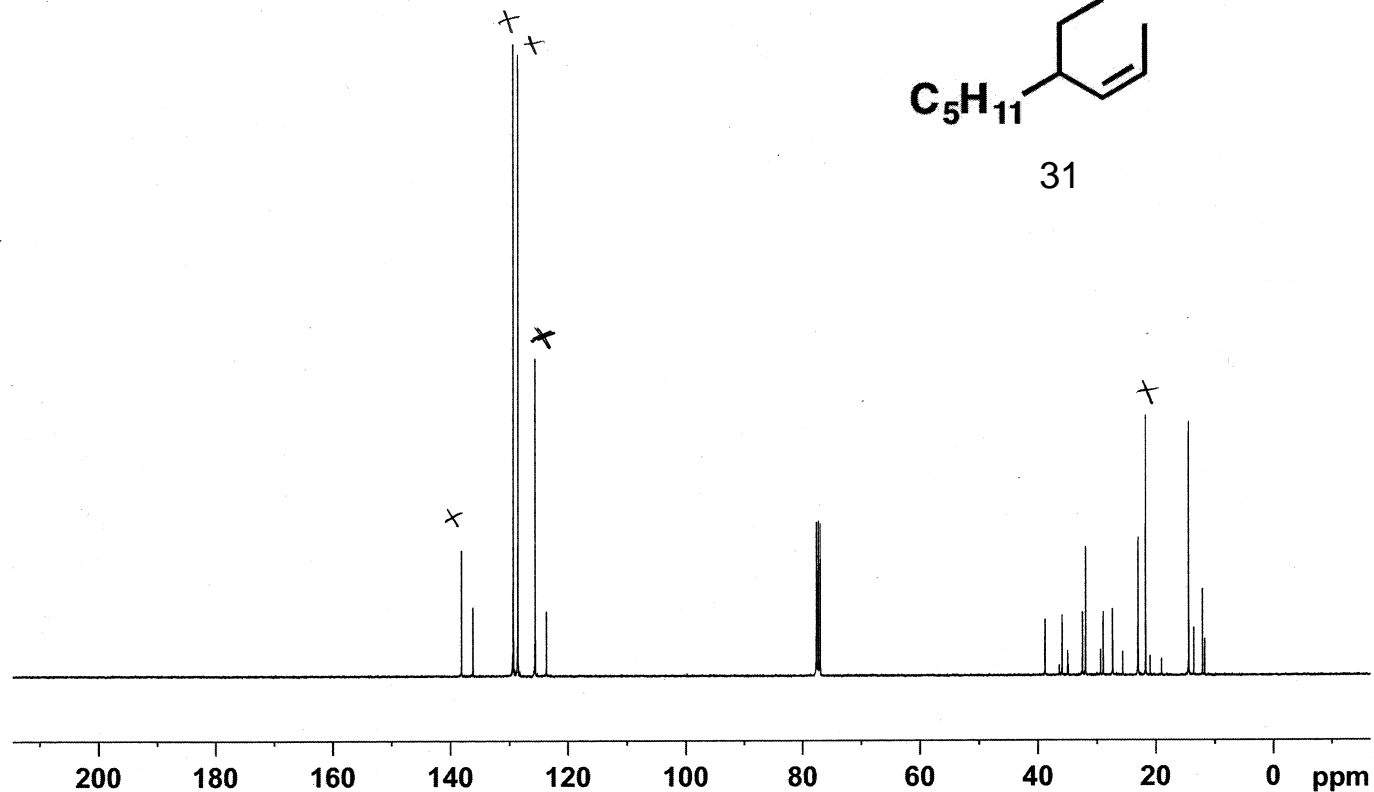

Current Data Parameters  
NAME BR-07-213 Rerun  
EXPNO 2  
PROCNO 1

F2 - Acquisition Parameters  
Date\_ 20150802  
Time\_ 0.31  
INSTRUM spect  
PROBHD 5 mm PABBO BB/  
PULPROG zgpg30  
TD 65536  
SOLVENT CDCl3  
NS 1024  
DS 4  
SWH 24038.461 Hz  
FIDRES 0.366798 Hz  
AQ 1.3631488 sec  
RG 2050  
DW 20.800 usec  
DE 6.50 usec  
TE 300.1 K  
D1 2.00000000 sec  
D11 0.03000000 sec  
TD0 1

==== CHANNEL f1 =====  
SFO1 100.6328883 MHz  
NUC1 13C  
P1 9.50 usec  
PLW1 53.29999924 W

==== CHANNEL f2 =====  
SFO2 400.1716007 MHz  
NUC2 1H  
CPDPRG[2] waltz16  
PCPD2 80.00 usec  
PLW2 14.60000038 W  
PLW12 0.51327997 W  
PLW13 0.32850000 W

F2 - Processing parameters  
SI 32768  
SF 100.6228053 MHz  
WDW EM  
SSB 0  
LB 1.00 Hz  
GB 0  
PC 1.40

\*  
BREAK  
\*  
BREAK  
\*  
BREAK  
\*  
BREAK

\*AN  
RUN # 2279    OCT 6, 1991 17:09:58  
START

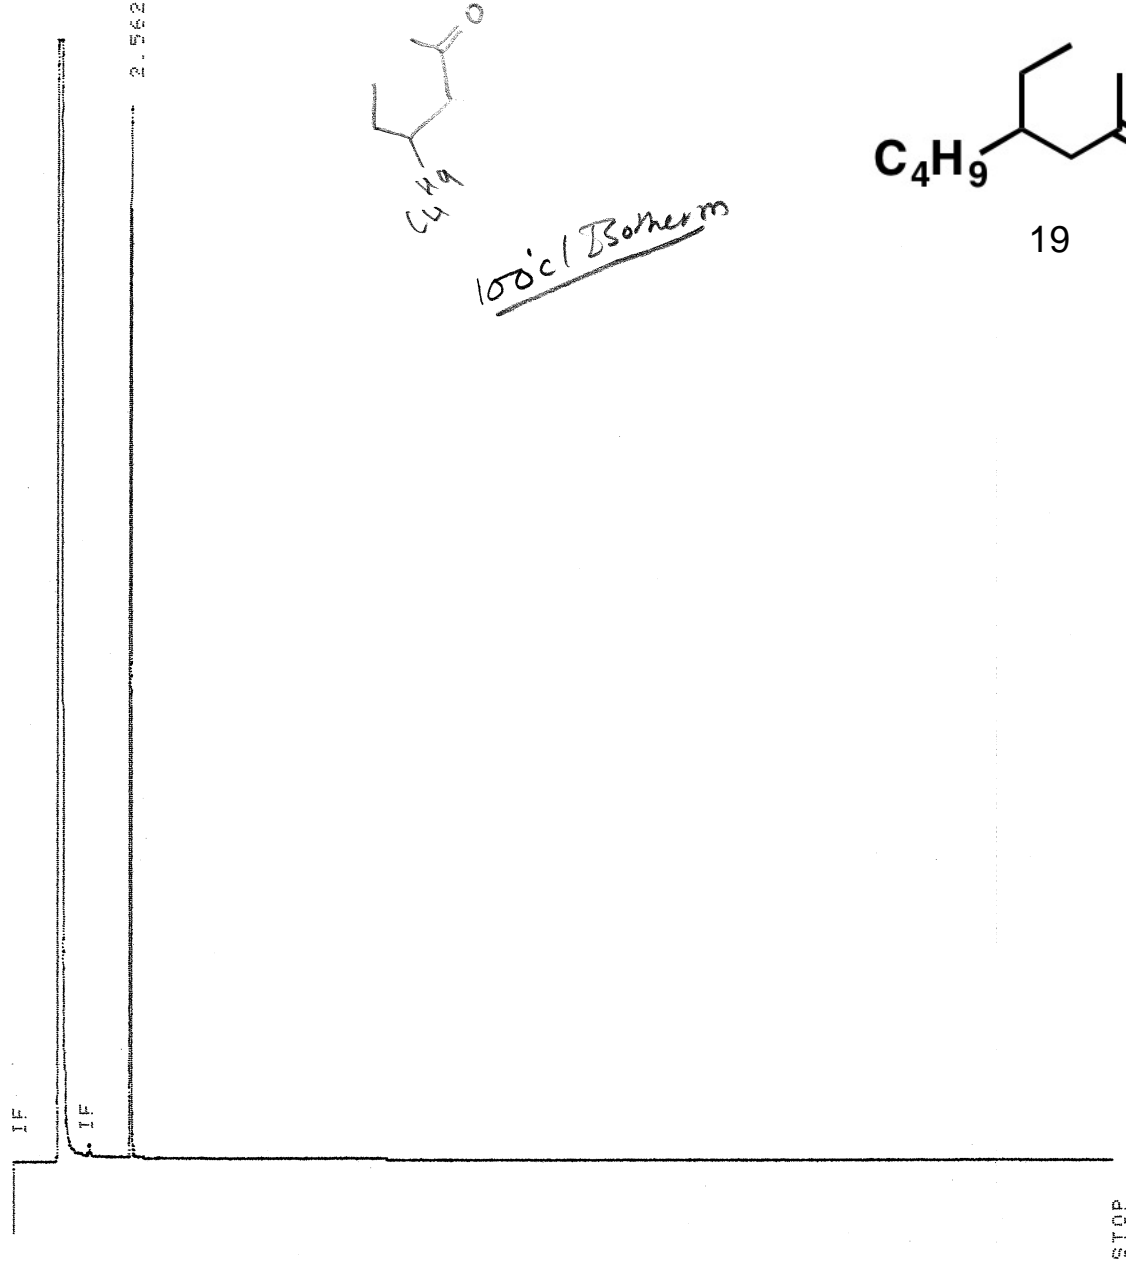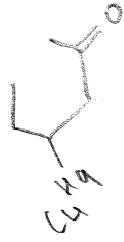

100% Isohexan

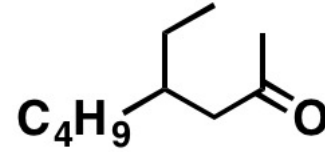

19

Error storing signal to M:SIGNAL .BNA  
DIRECTORY FULL  
Storing processed peaks to M:SIGNAL .PRA

RUN# 2279    OCT 6, 1991 17:09:58

PEAK FILE : M:SIGNAL.PRA

AREA%  
RT    AREA TYPE    WIDTH    AREA%  
2.562    3455360    SPB    .930    100.00000

BR-07-:  
100% Iso



File :D:\MSDCHEMData\Babu\Balaram\BR-07-255-2.D  
Operator : BALARAM  
Acquired : 26 Sep 2015 15:43 using AcqMethod 100-ISOTHERM.M  
Instrument : GCMS  
Sample Name: BR-07-255-2  
Misc Info :  
Vial Number: 1

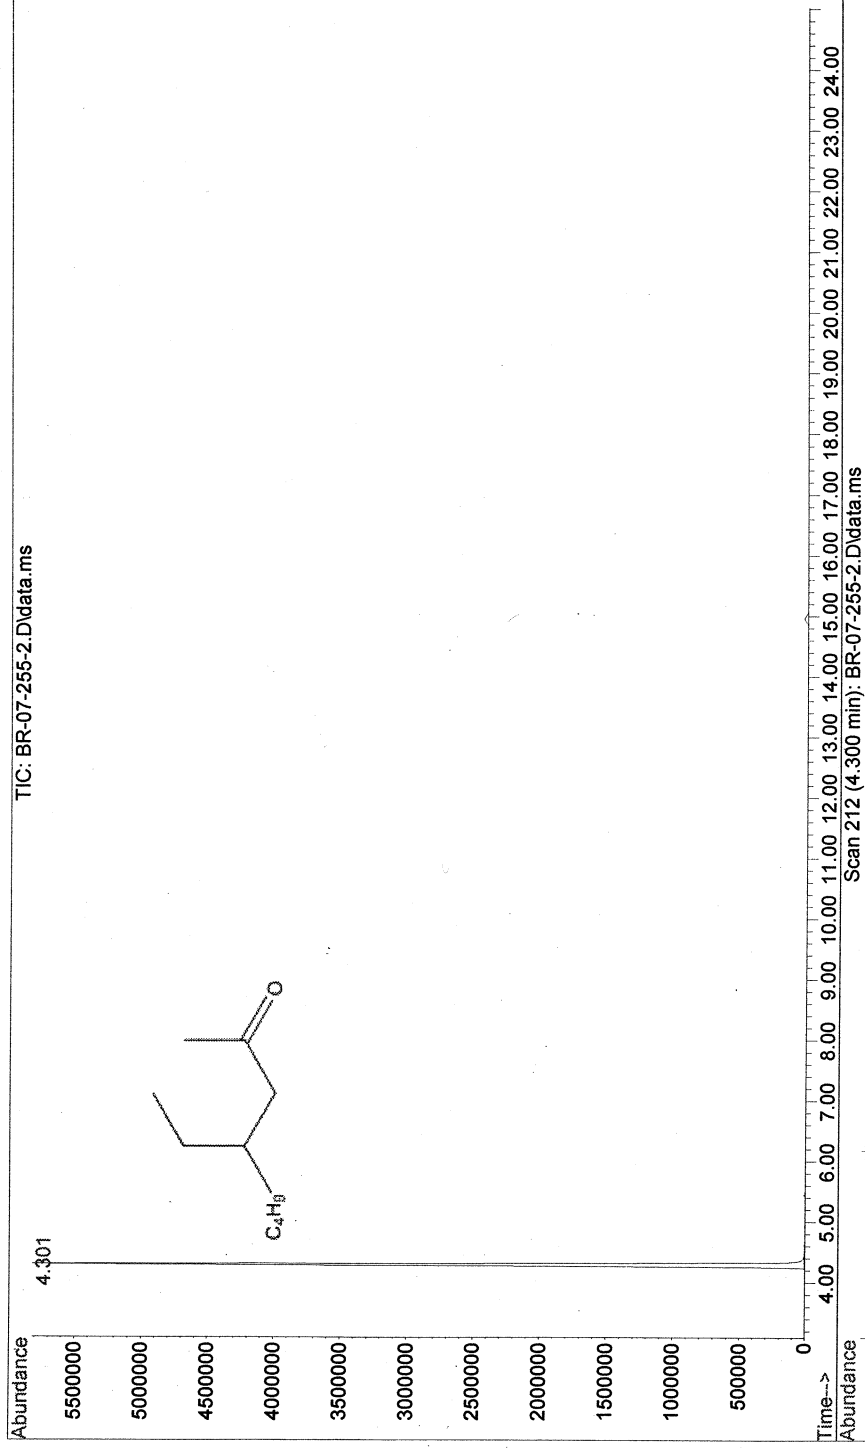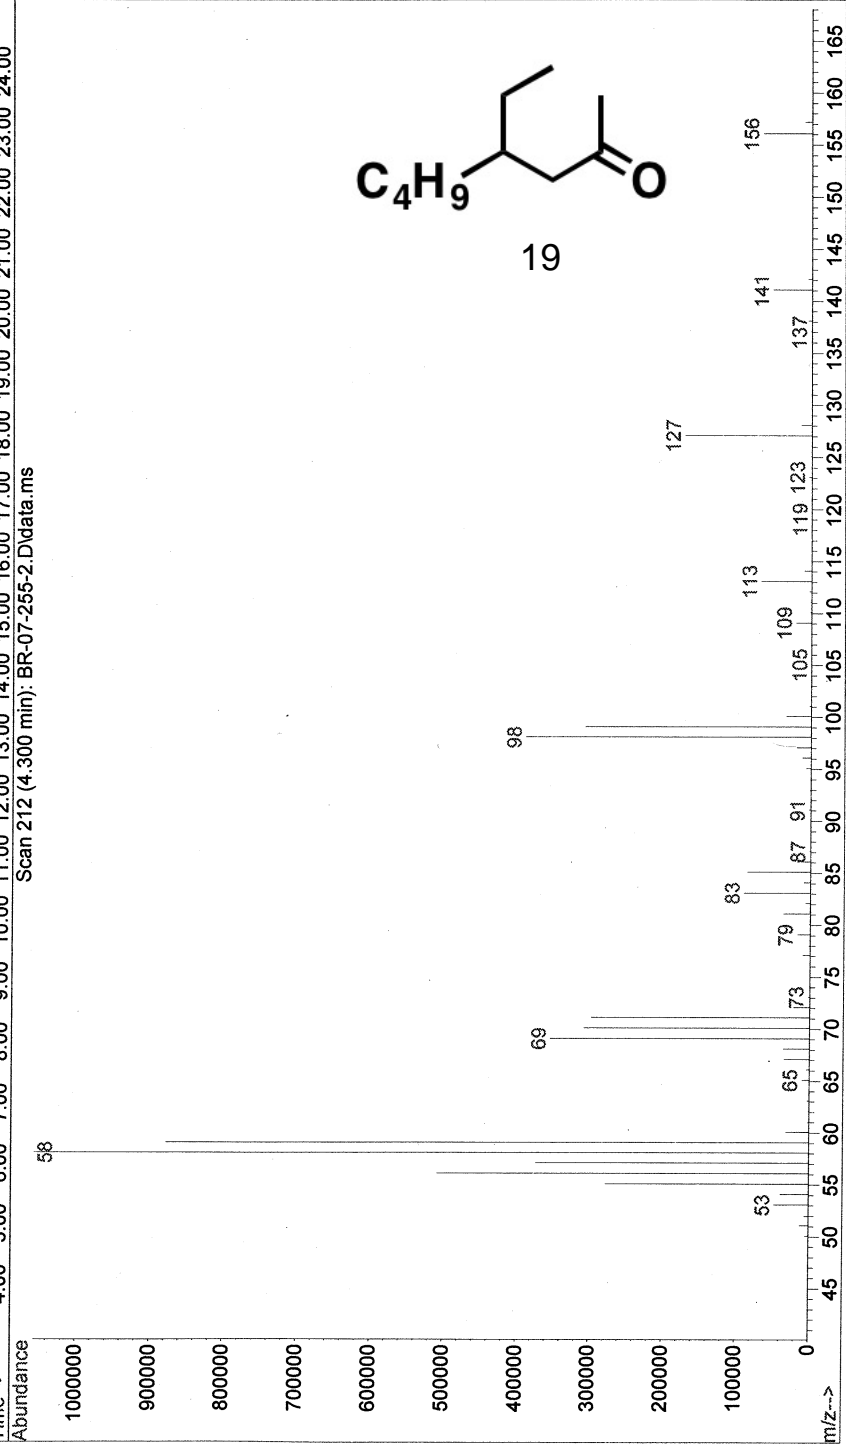

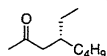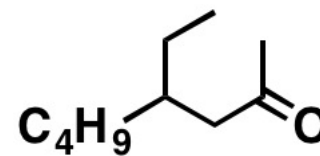

19

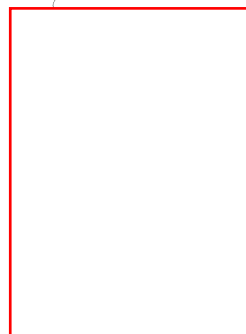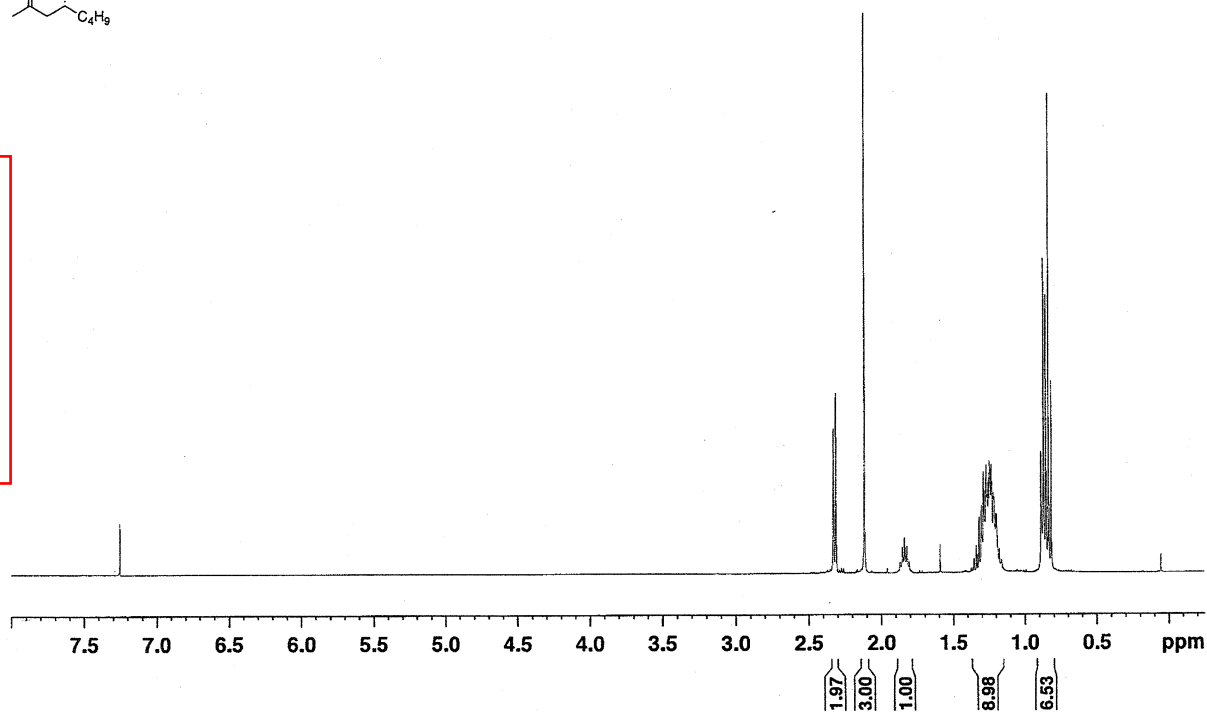

<sup>1</sup>H NMR (400 MHz, CDCl<sub>3</sub>) Spectra of Compound

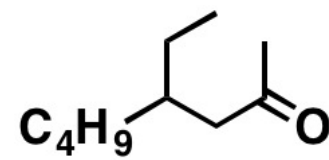

19

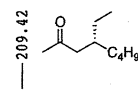

77.32  
77.00  
76.69

48.41  
35.29  
33.17  
30.38  
29.69  
28.84  
26.37  
22.93  
14.05  
10.80

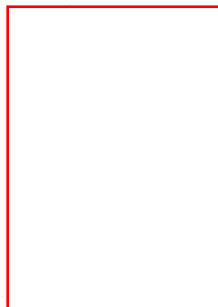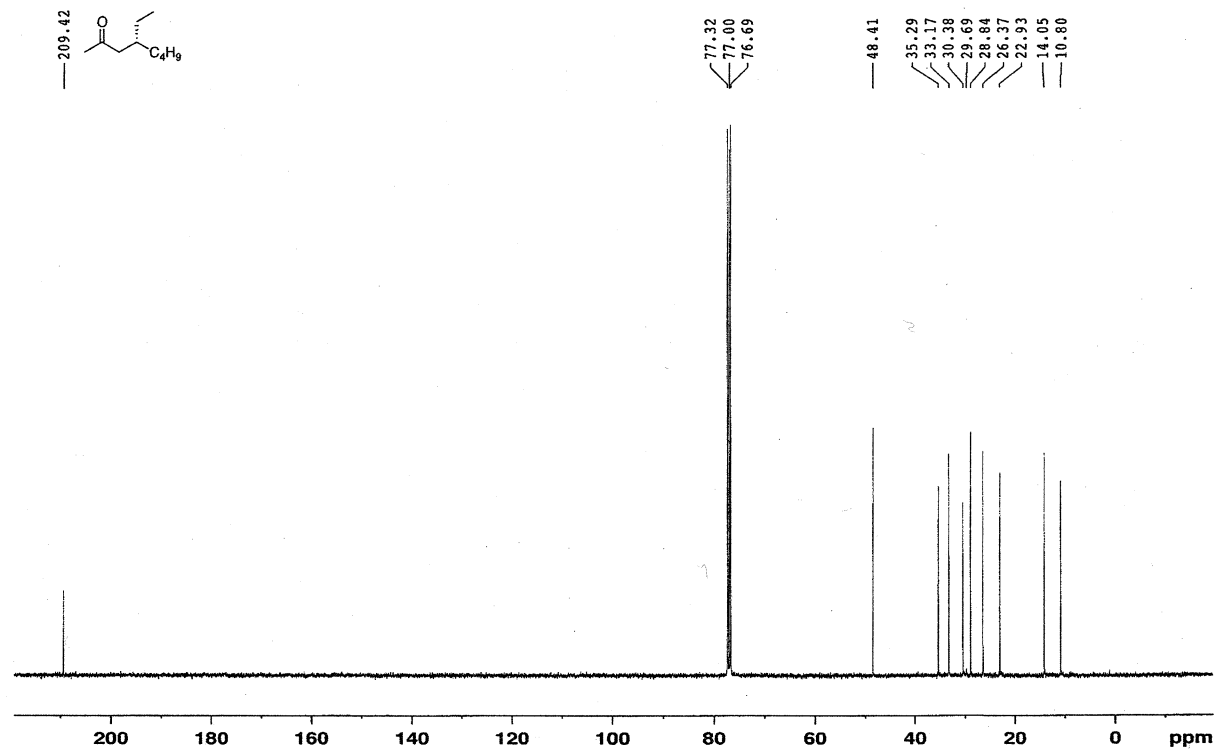

<sup>13</sup>C NMR (100 MHz, CDCl<sub>3</sub>) Spectra of Compound

=====  
 Acq. Operator : BISWAS  
 Acq. Instrument : Babu  
 Injection Date : 10/1/2015 1:50:27 PM  
 Seq. Line : 1  
 Location : Vial 201  
 Inj : 1

*dppp - reduction  
 (80°C - 10 min)  
 Cyclostil B*

Different Inj Volume from Sequence ! Actual Inj Volume : 1 µl  
 Acq. Method : C:\CHEM32\1\DATA\SB\SB-1-CHIRAL 2015-10-01 13-49-15\80\_C-ISO\_CHIRAL.M  
 Last changed : 10/1/2015 3:17:53 PM by BISWAS

(modified after loading)  
 Analysis Method : C:\CHEM32\1\METHODS\STANDBY.M  
 Last changed : 10/1/2015 10:44:37 AM by Kendra  
 (modified after loading)

Method Info : Checkout 7820A at OSU; front channel

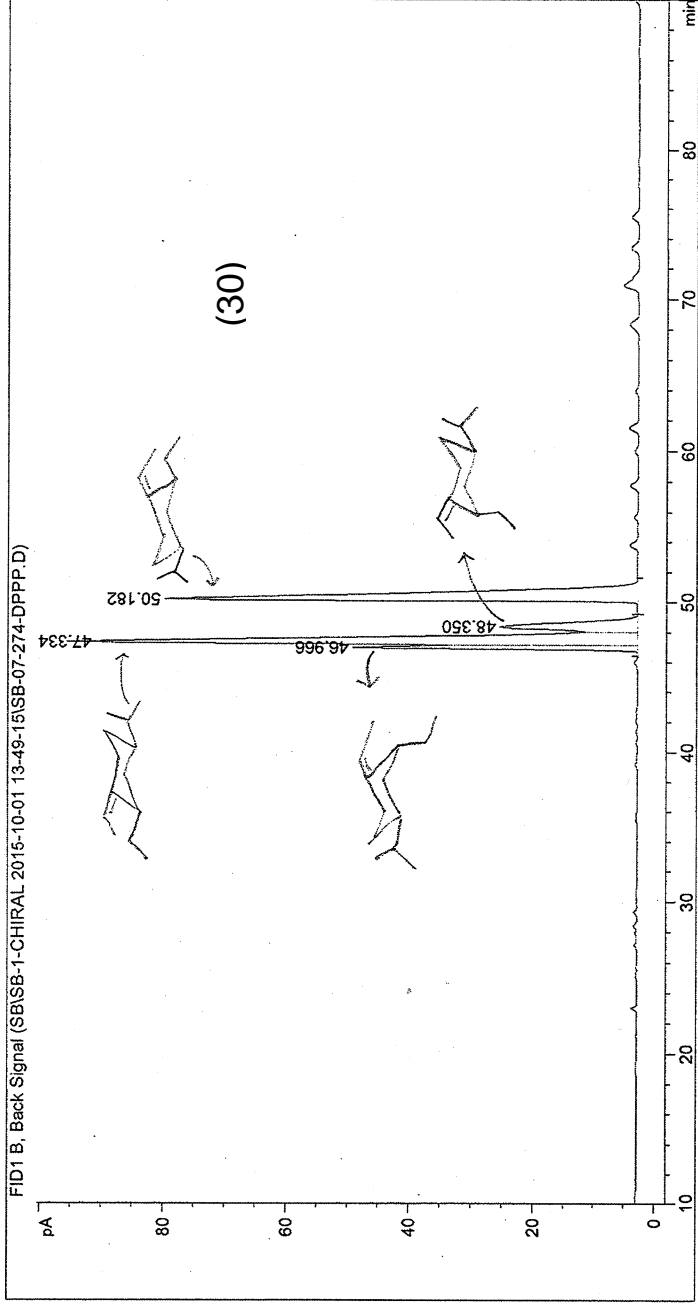

=====  
 Area Percent Report  
 =====

Sorted By : Signal  
 Multiplier: : 1.0000  
 Dilution: : 1.0000  
 Use Multiplier & Dilution Factor with ISTDs

Signal 1: FID1 B, Back Signal

| Peak # | RetTime [min] | Type | Width [min] | Area [pA*s] | Height [pA] | Area %   |
|--------|---------------|------|-------------|-------------|-------------|----------|
| 1      | 46.966        | VV   | 0.2232      | 695.23895   | 46.30341    | 10.69985 |
| 2      | 47.334        | VV   | 0.3756      | 2573.46802  | 92.10998    | 39.60612 |
| 3      | 48.350        | VV   | 0.4284      | 736.79749   | 22.50037    | 11.33944 |
| 4      | 50.182        | VV   | 0.4152      | 2492.14819  | 76.83704    | 38.35459 |

(SS-BDPP) reduction  
800-1601chem  
Cycloasil-B

=====  
Acq. Operator : BISWAS  
Acq. Instrument : Babu  
Injection Date : 10/1/2015 9:35:43 PM  
Seq. Line : 1  
Location : Vial 201  
Inj : 1  
Inj Volume : 1 µl  
Actual Inj Volume : 5 µl  
Different Inj Volume from Sequence !  
Acq. Method : C:\CHEM32\1\DATA\SB\SB-1-CHIRAL 2015-10-01 21-34-34\80\_C-ISO\_CHIRAL.M  
Last changed : 10/1/2015 9:34:34 PM by BISWAS  
Analysis Method : C:\CHEM32\1\METHODS\STANDBY.M  
Last changed : 10/2/2015 12:19:48 PM by Kendra  
(modified after loading)  
Method Info : Checkout 7820A at OSU; front channel

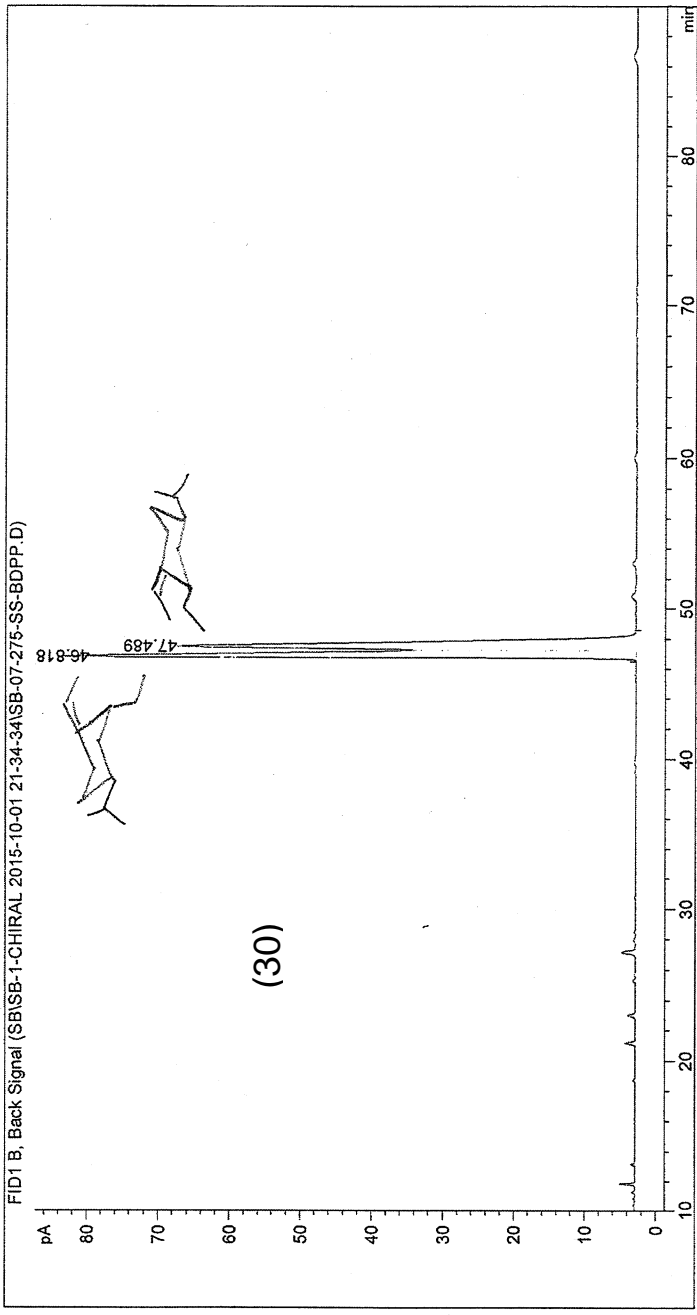

=====  
Area Percent Report  
=====

Sorted By : Signal  
Multiplier: : 1.0000  
Dilution: : 1.0000  
Use Multiplier & Dilution Factor with ISTDs

Signal 1: FID1 B, Back Signal

| Peak # | RetTime [min] | Type | Width [min] | Area [pA*s] | Height [pA] | Area %   |
|--------|---------------|------|-------------|-------------|-------------|----------|
| 1      | 46.818        | BV   | 0.3108      | 1848.43604  | 80.12138    | 48.90229 |
| 2      | 47.489        | VB   | 0.4043      | 1931.42004  | 63.81955    | 51.09771 |

Totals : 3779.85608 143.94093

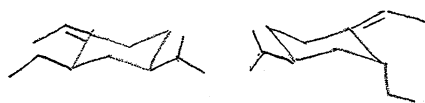

(From SS-BDPP)

(30)

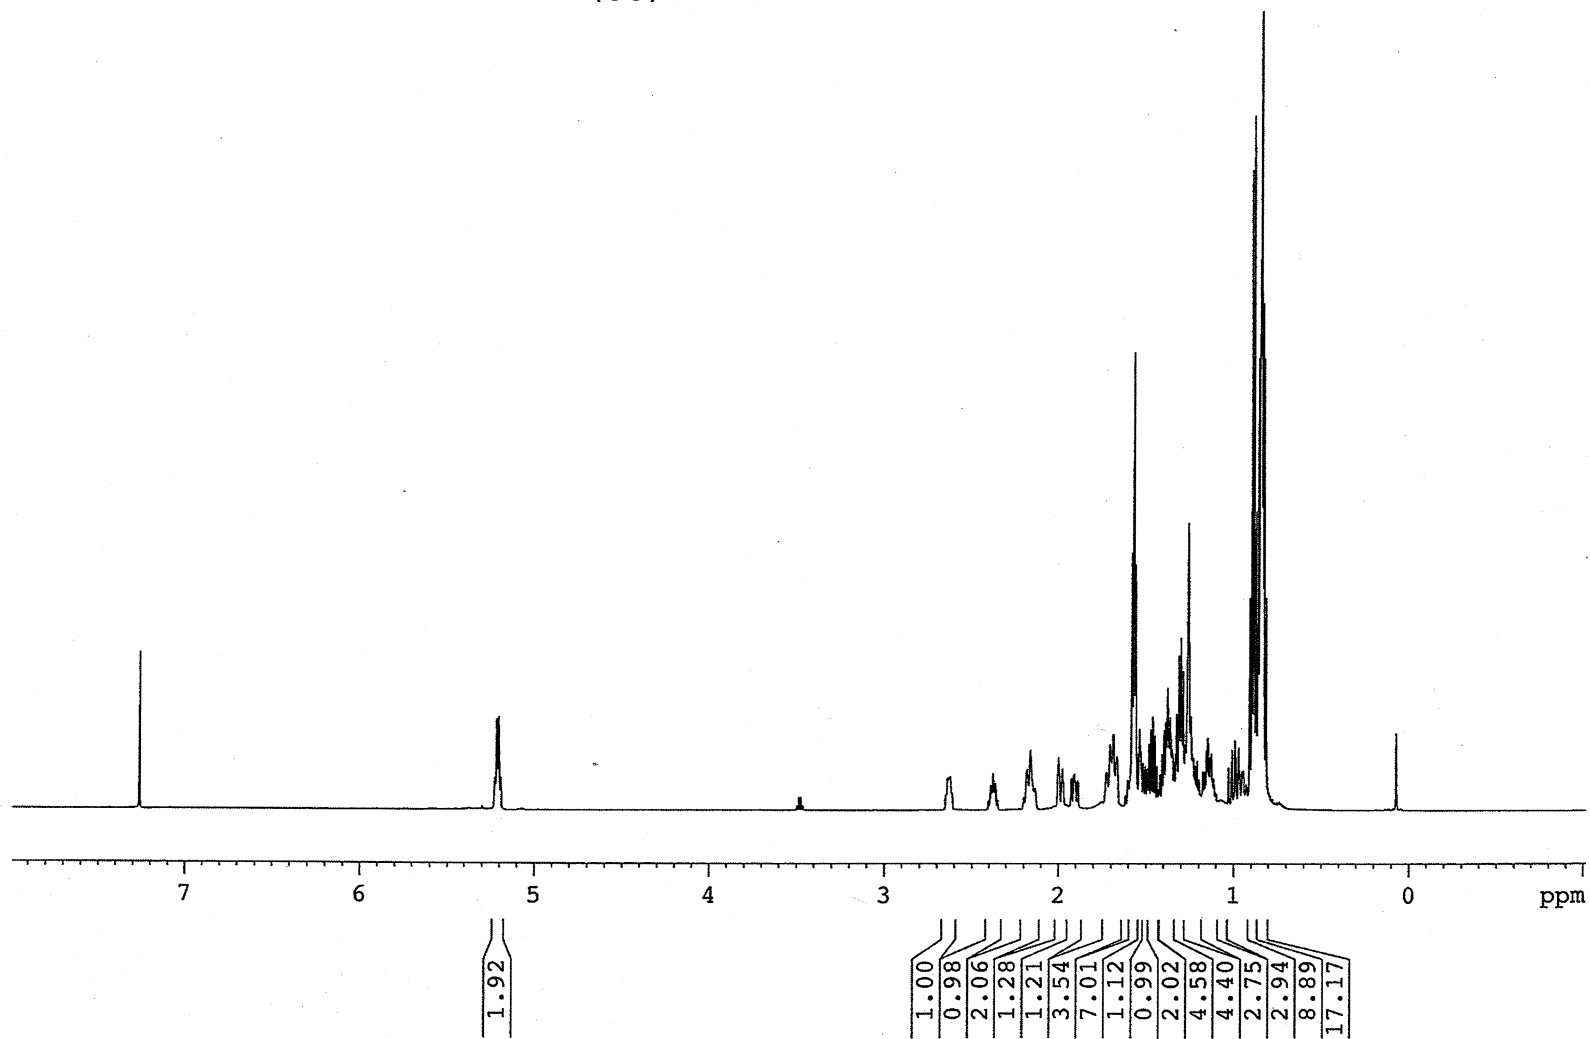

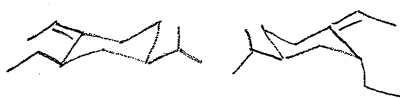

(5S-BDPP)-ext 1

(30)

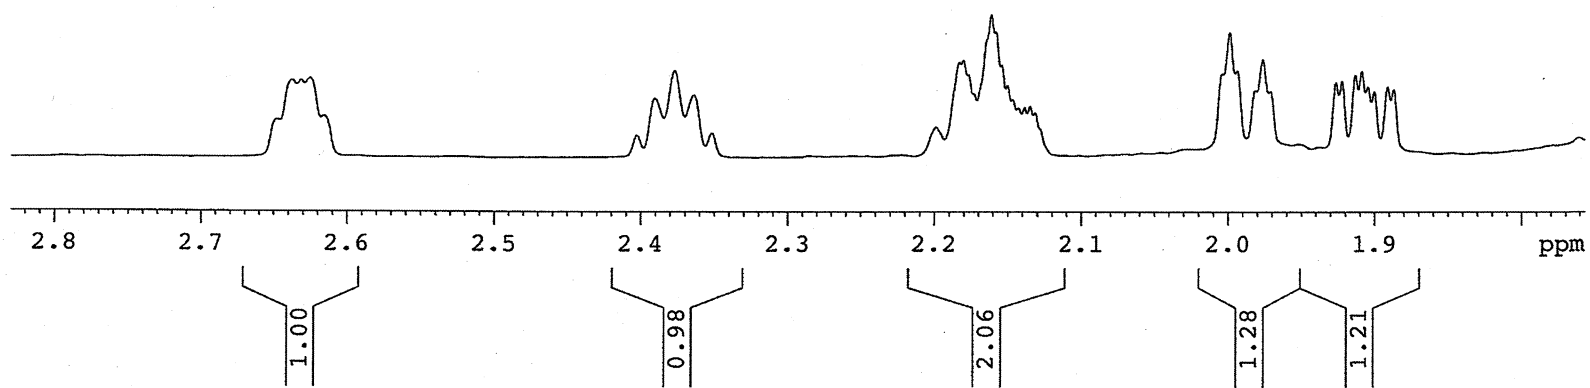

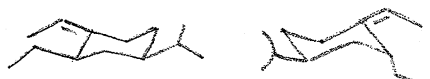

(S,S-BDPE)-ext 3

(30)

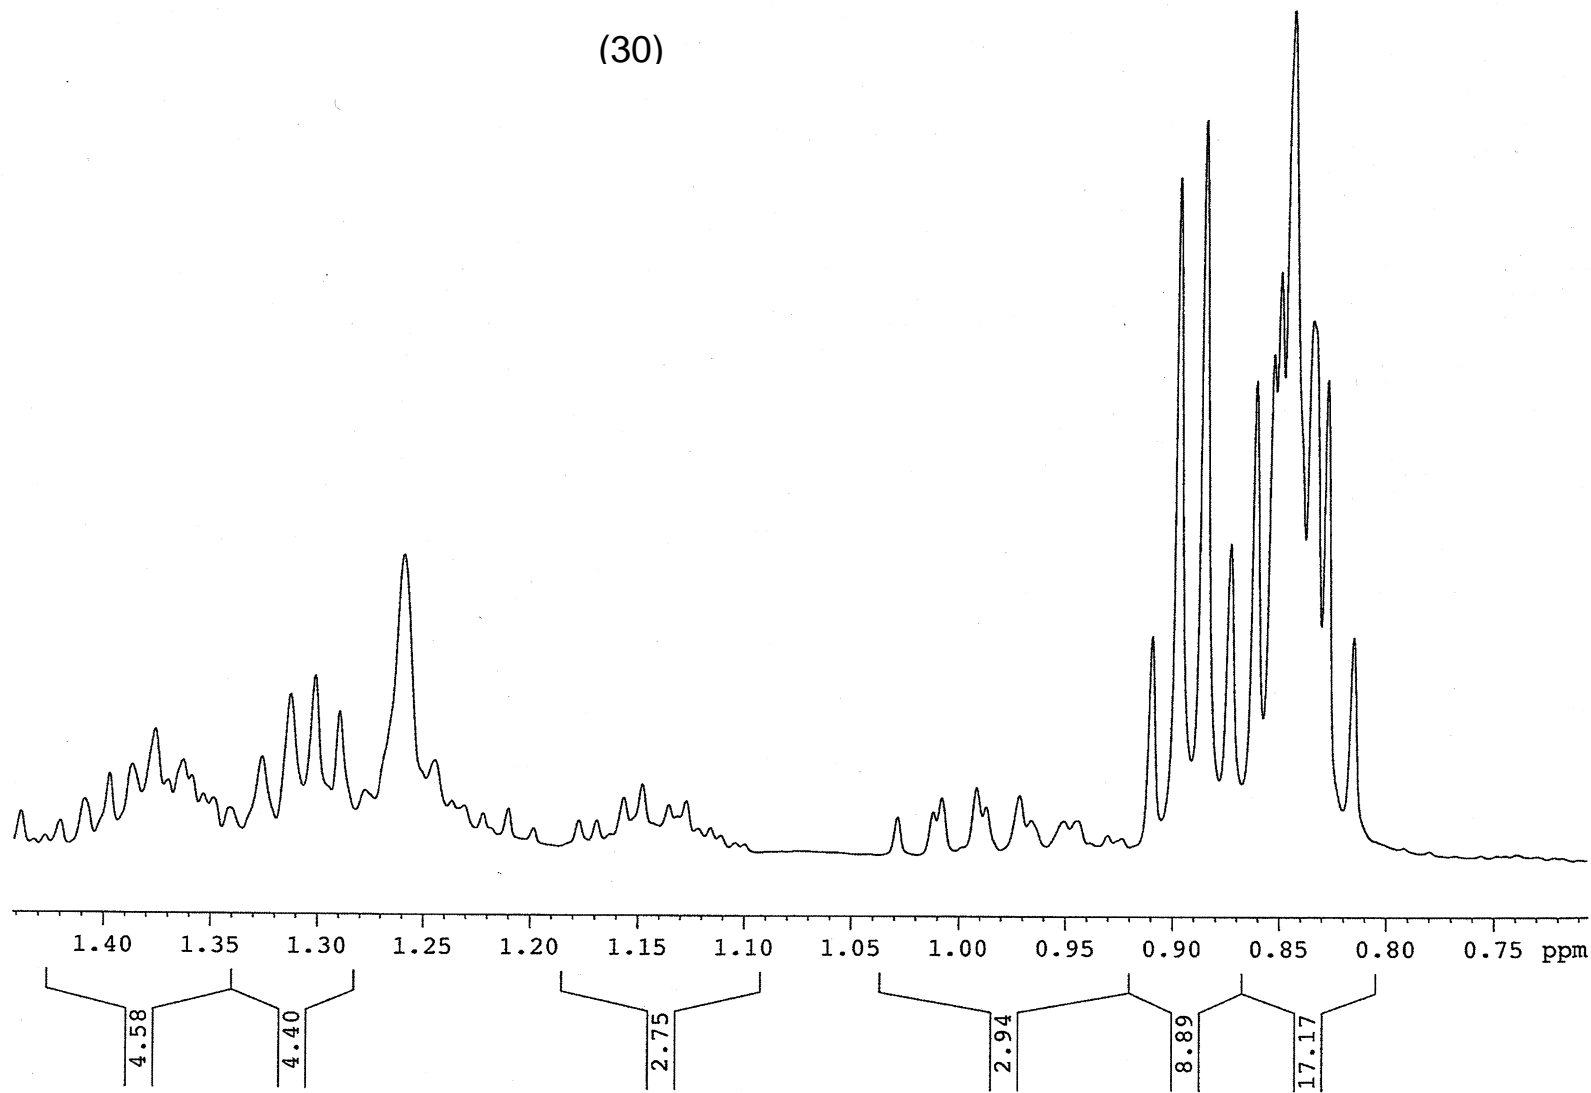



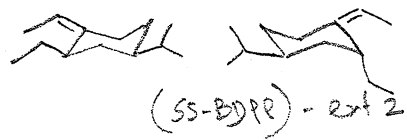

(30)

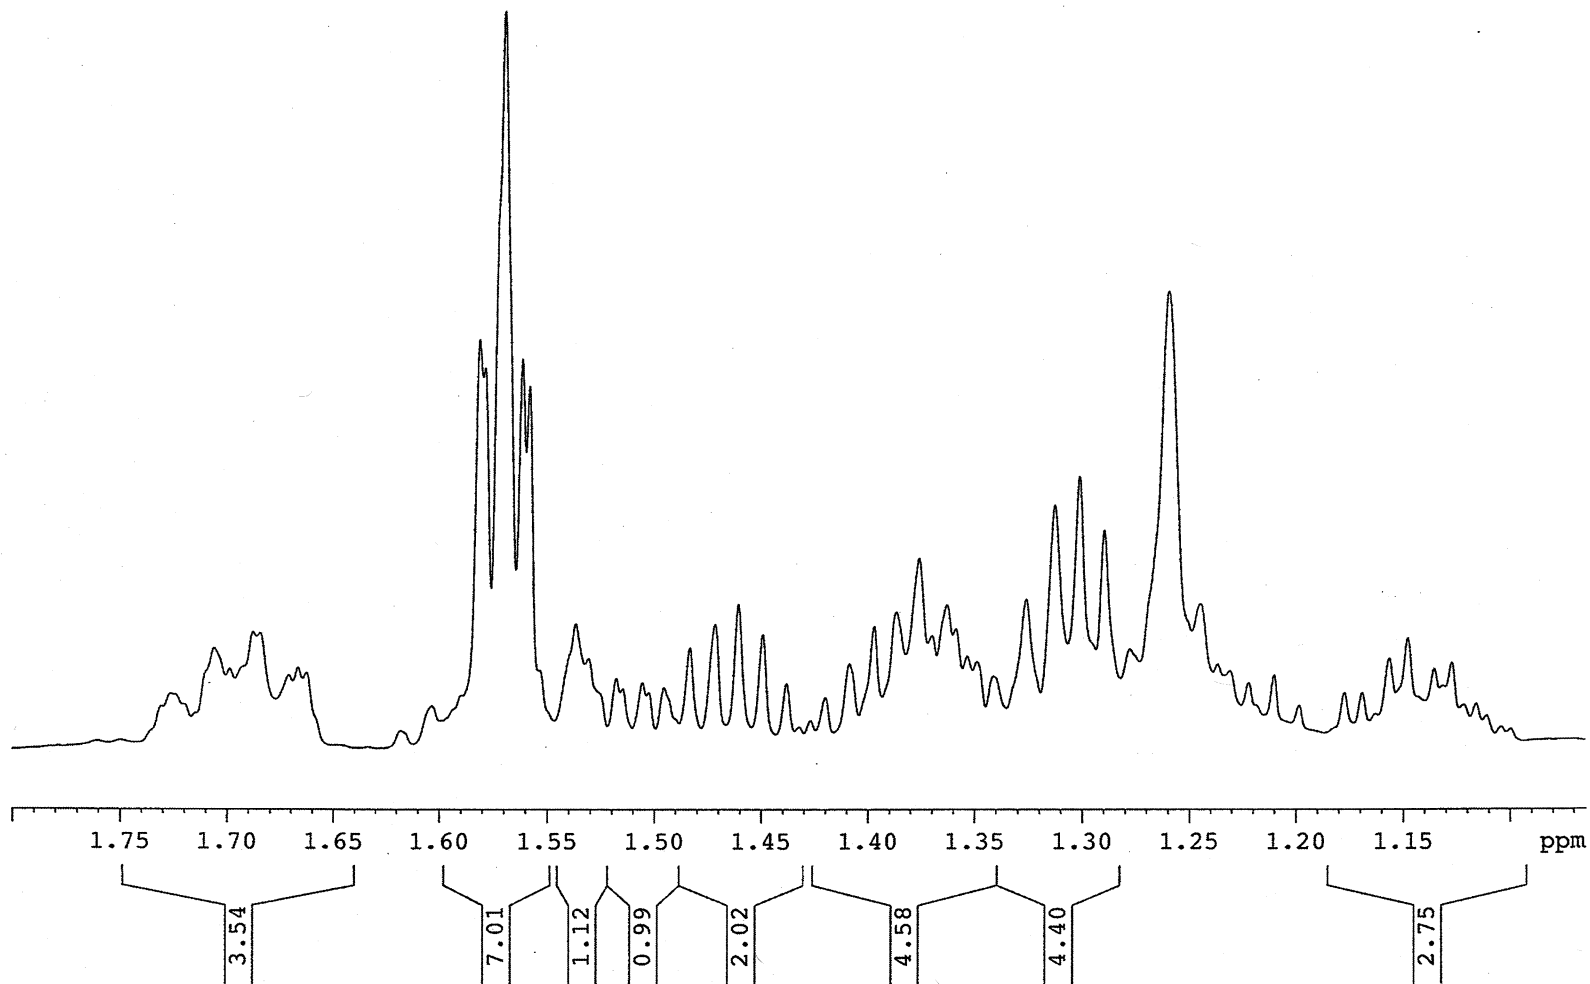

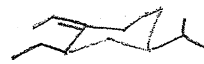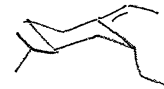

(From SS-BDPP)

(30)

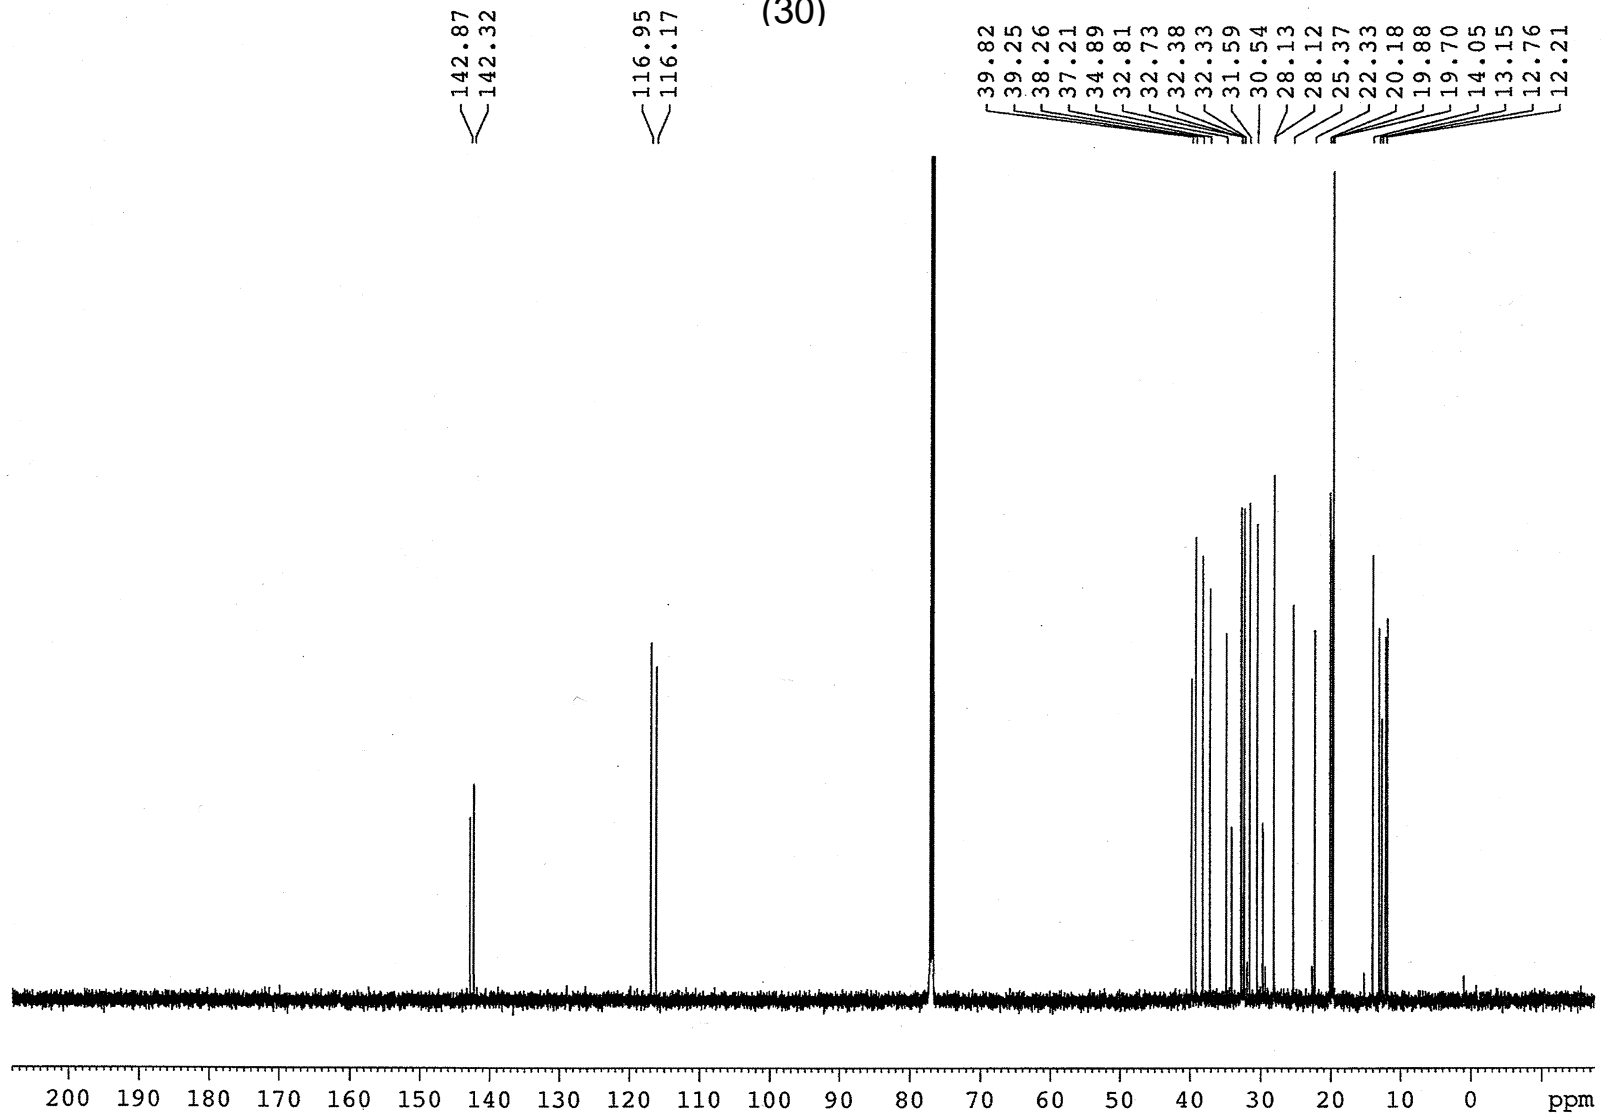

\*  
BREAK  
\*  
BREAK  
\*  
BREAK  
\*  
BREAK  
\*  
BREAK

\*9N  
RUN # 2253    OCT 2, 1991    18:55:19  
START

IF

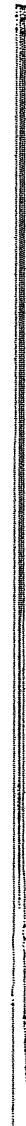

4.567

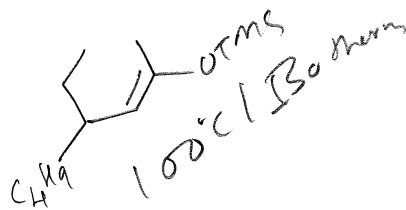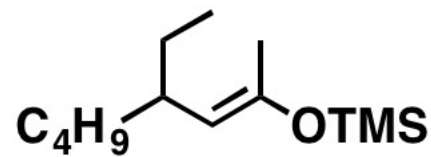

33

END OF SIGNAL

Error storing signal to M:SIGNAL -END  
DIRECTORY FULL  
Storing processed peaks to M:SIGNAL .PRG

File : D:\MSDCHEMData\Babu\Balaram\BR-07-215 .D  
Operator : BALARAM  
Acquired : 31 Jul 2015 10:30 using AcqMethod 100-ISOTHERM.M  
Instrument : GCMS  
Sample Name: BR-07-215  
Misc Info :  
Vial Number: 1

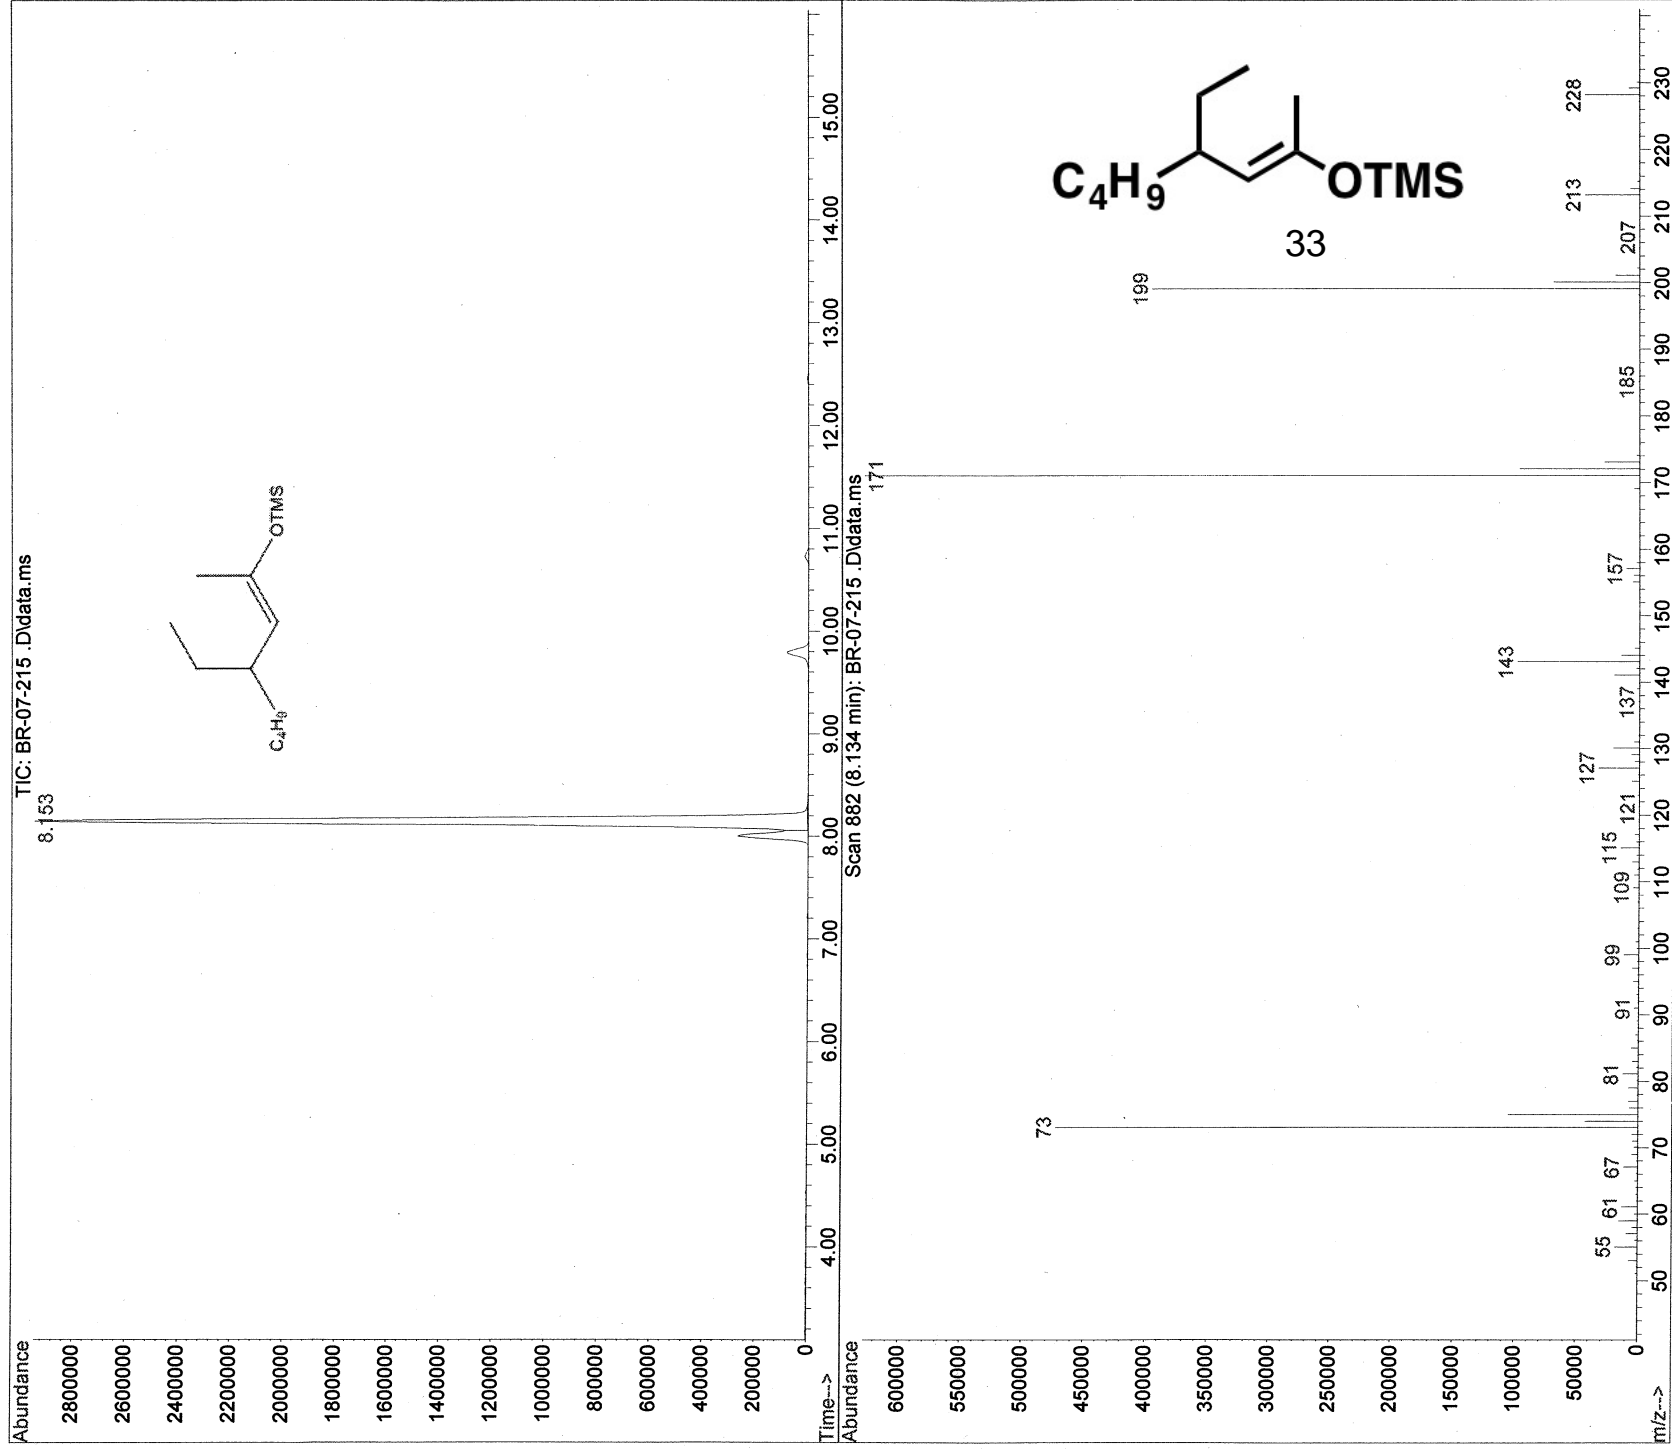

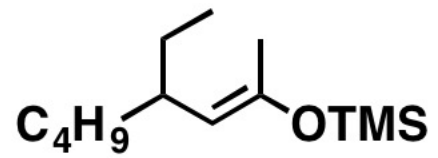

33

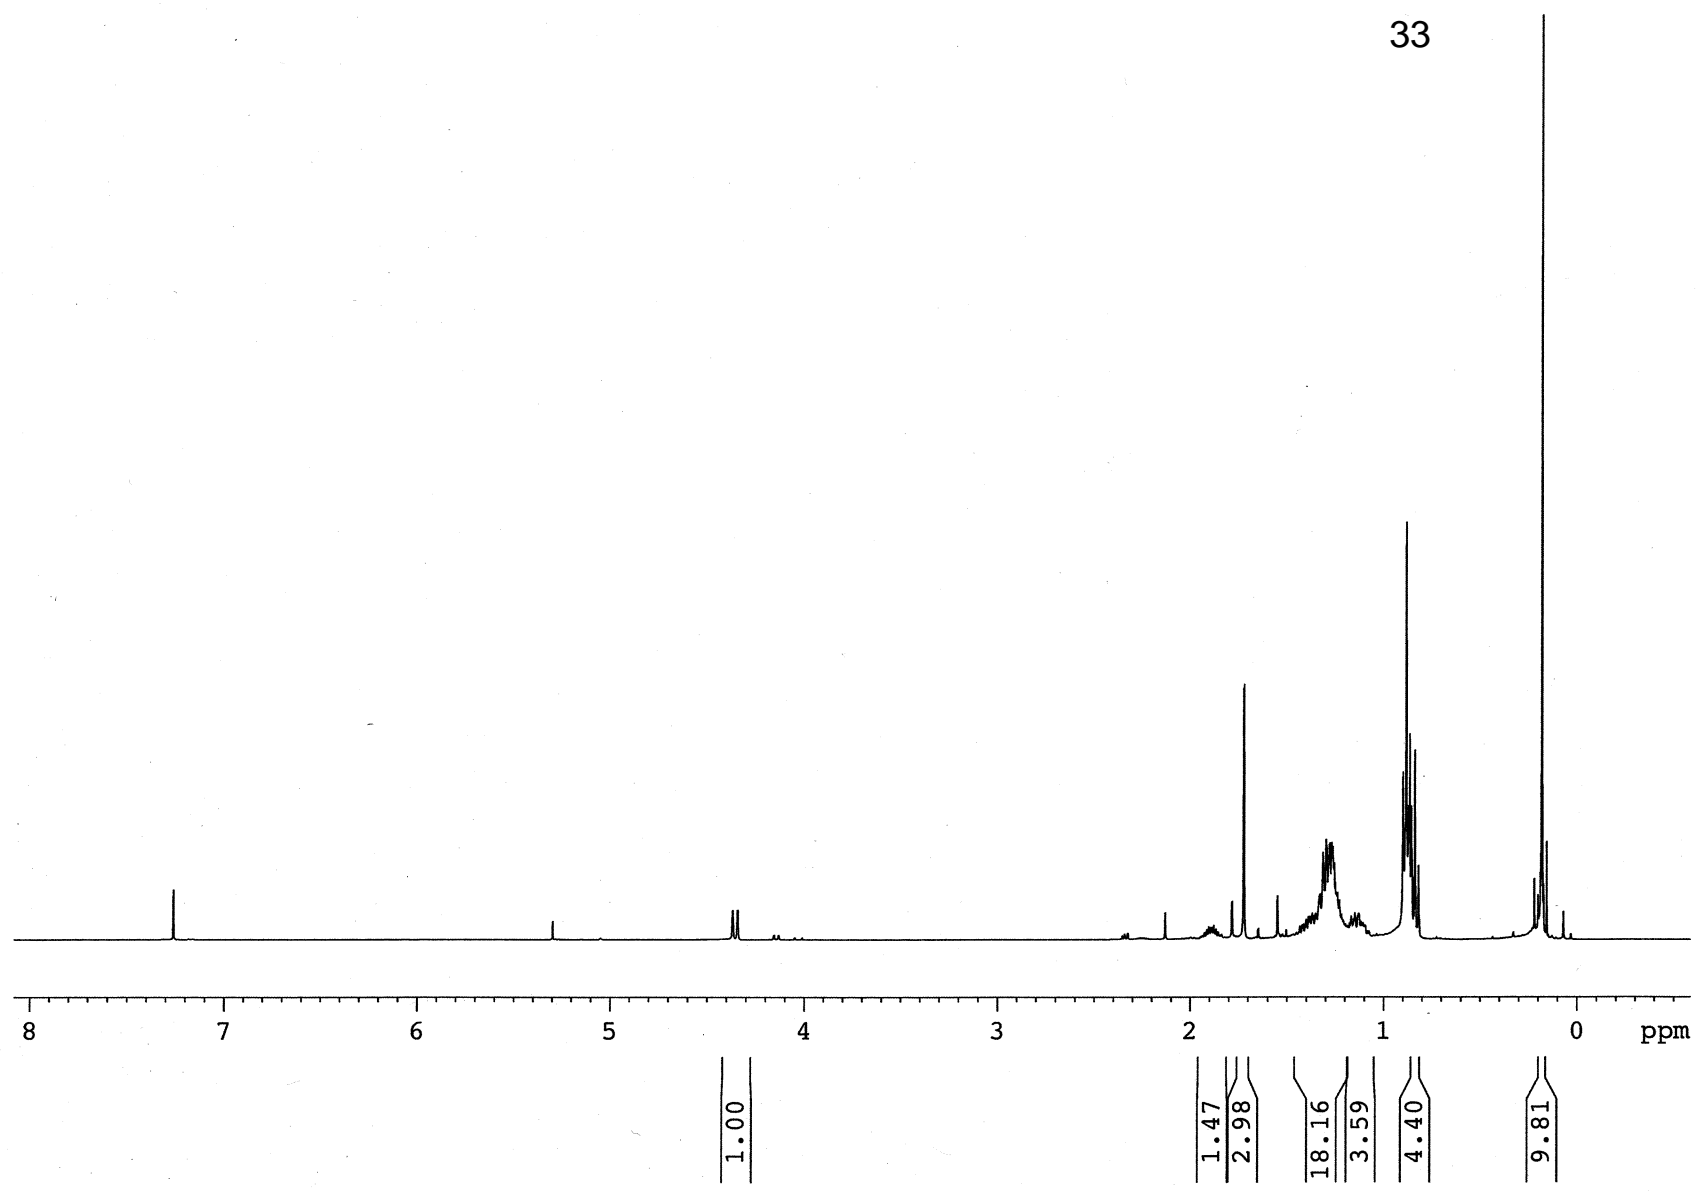

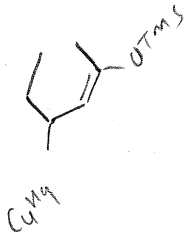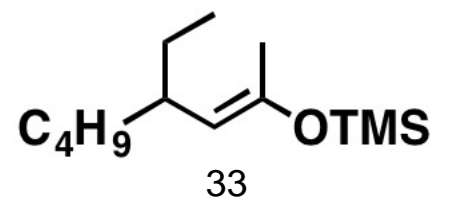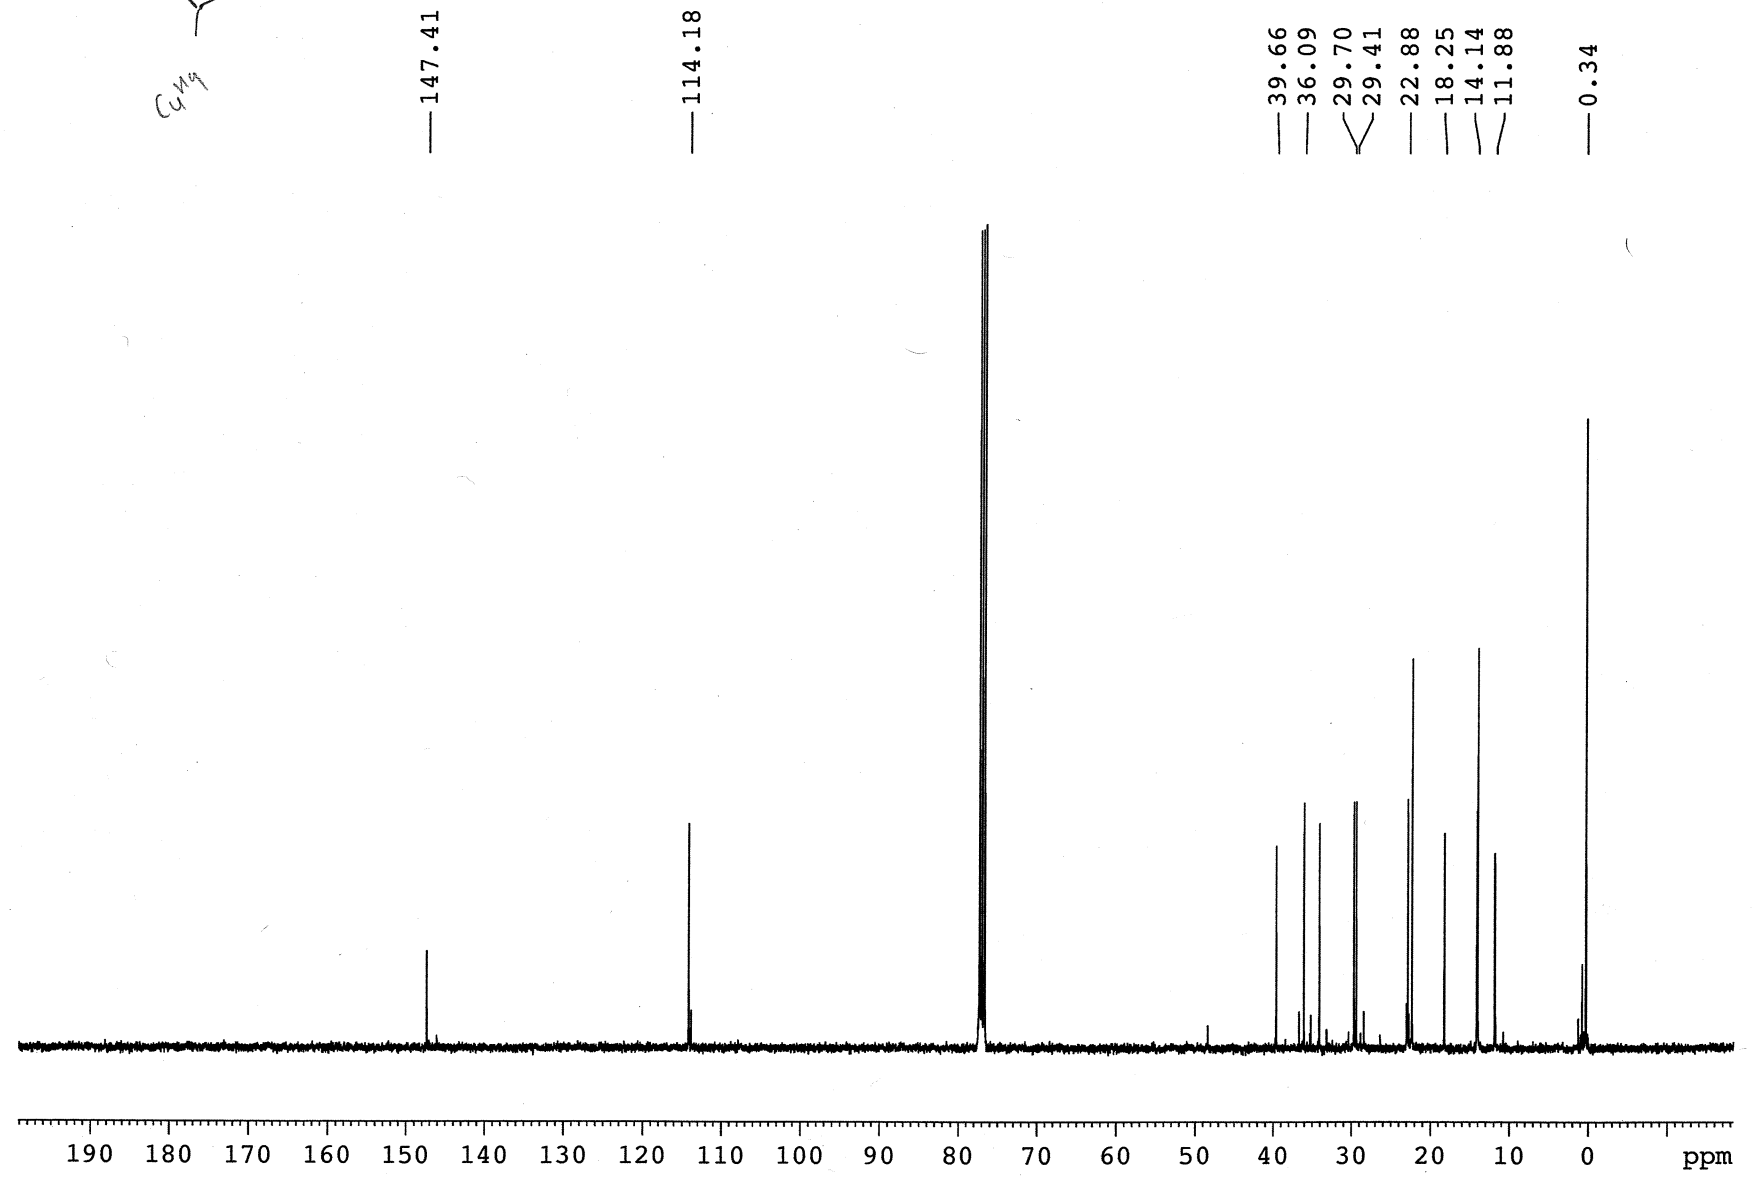

RUN # 1822 AUG 16, 1901 17:39:08  
START

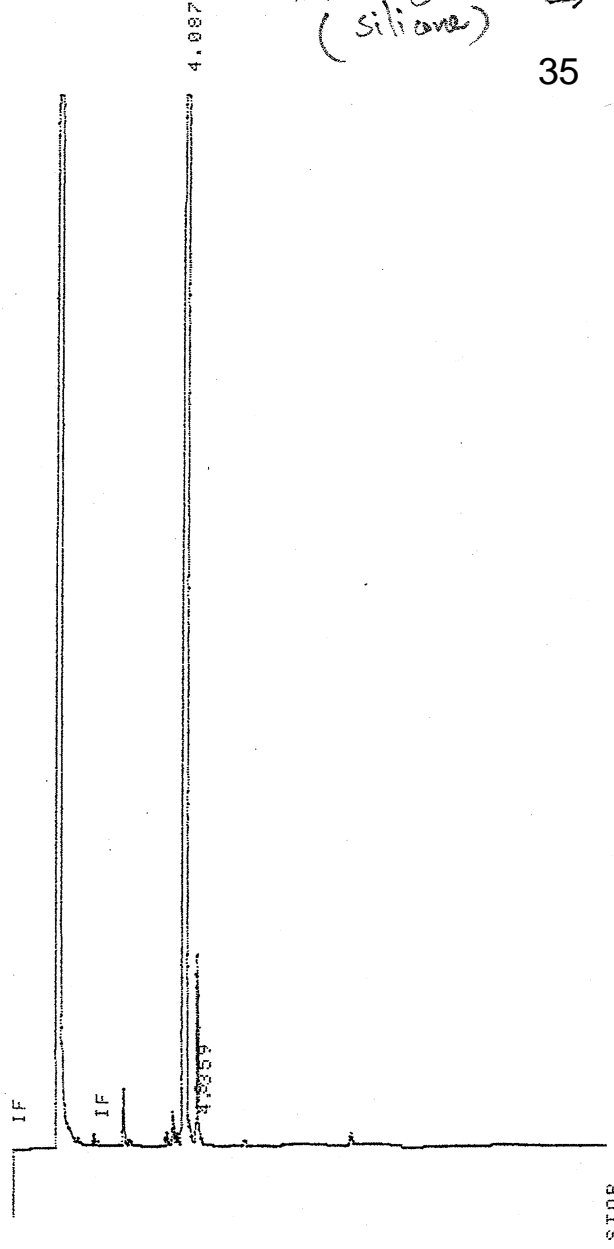

130°C - Iso  
HP-methyl  
(silicone)

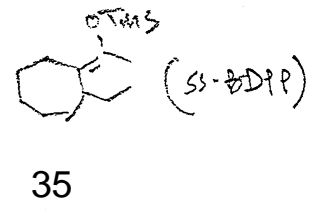

Error storing signal to M:SIGNAL .BNA  
DIRECTORY FULL  
Storing processed peaks to M:SIGNAL .PRA

RUN# 1822 AUG 16, 1901 17:39:08

PEAK FILE : M:SIGNAL.PRA

| AREA% | RT    | AREA     | TYPE | WIDTH | AREA%    |
|-------|-------|----------|------|-------|----------|
|       | 4.087 | 12656624 | SHB  | .059  | 98.05914 |
|       | 4.359 | 250508   | BB   | .044  | 1.94085  |

TOTAL AREA=1.2907E+07  
MUL FACTOR=1.0000E+00

File : D:\MSDCHEMData\Babu\biswas\130ramp250.M\SB-07-234-DPPP-GCMS.D  
Operator : BISWAS  
Acquired : 20 Nov 2015 23:17 using AcqMethod 130RAMP250.M  
Instrument : GCMS  
Sample Name : SB-07-234-DPPP-GCMS  
Misc Info :  
Vial Number: 1

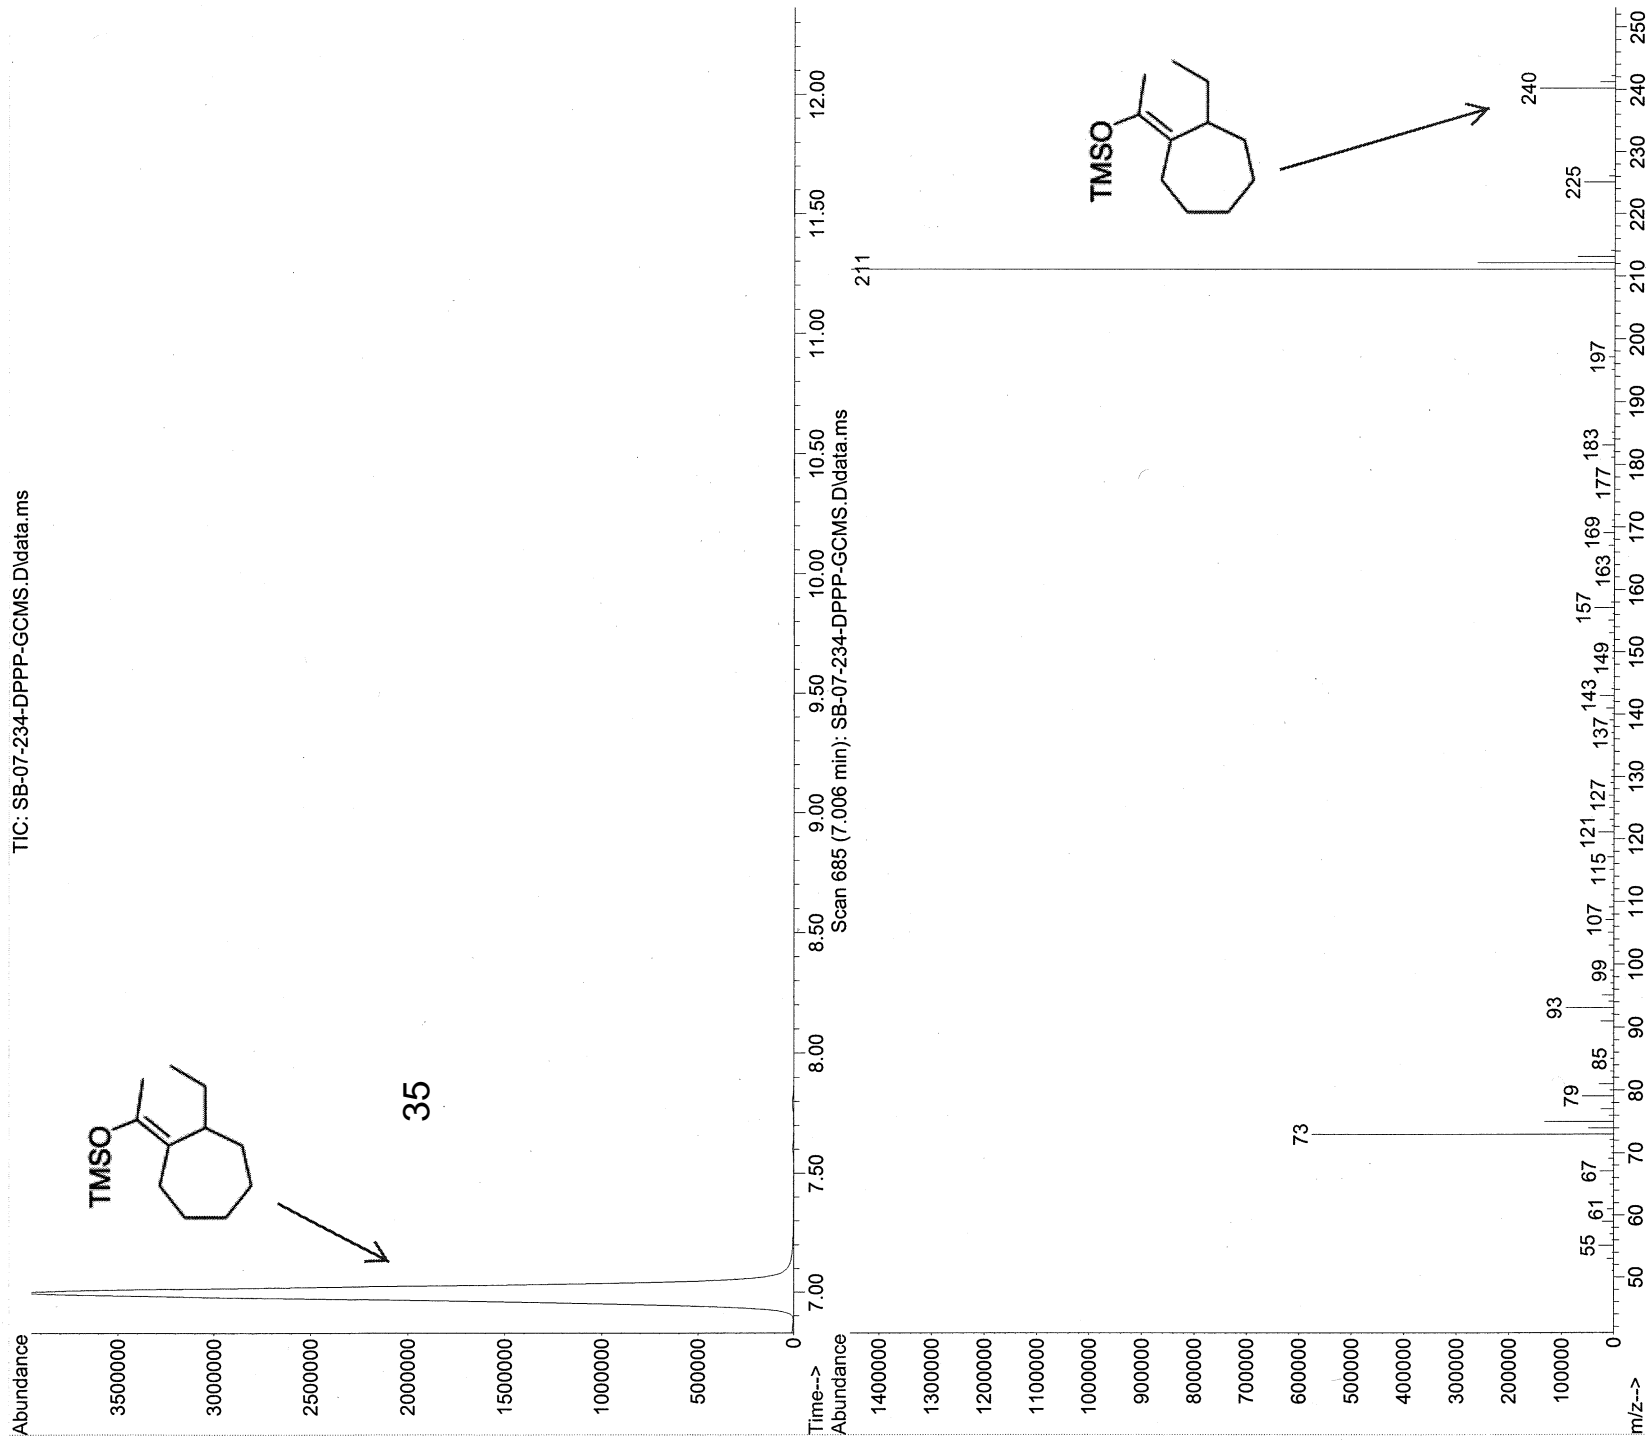



Sample Name: SB-04-147-DPPP-1.D

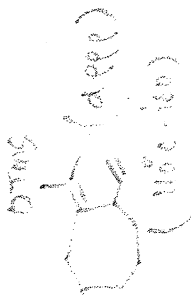

```
=====
Acq. Operator   : BISWAS                      Seq. Line : 1
Acq. Instrument : Babu                       Location  : Vial 201
Injection Date  : 3/24/2014 5:05:22 PM      Inj       : 1
                                                Inj Volume: 1 µl
=====
```

```
Different Inj Volume from Sequence !
Acq. Method    : C:\CHEM32\1\DATA\SB\SB-1-CHIRAL 2014-03-24 17-04-15\110_C-ISO_CHIRAL.M
Last changed   : 3/24/2014 5:45:53 PM by BISWAS
```

```
(modified after loading)
Analysis Method : C:\CHEM32\1\METHODS\STANDBY.M
Last changed    : 4/29/2014 5:11:59 PM by BISWAS
                (modified after loading)
```

Method Info : Checkout 7820A at OSU; front channel

26

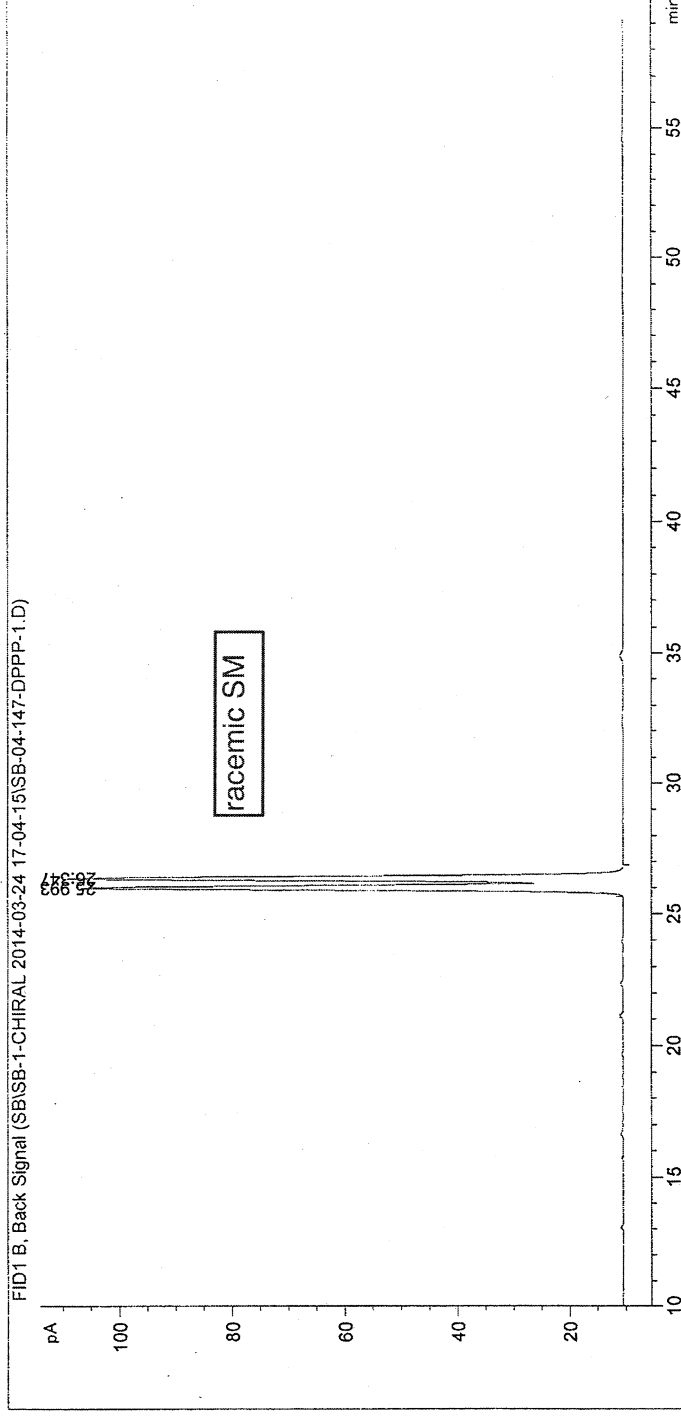

External Standard Report

```
=====
Sorted By      : Signal
Multiplier:    : 1.0000
Dilution:      : 1.0000
Use Multiplier & Dilution Factor with ISTDs
=====
```

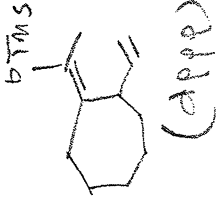

=====  
Area Percent Report  
=====

Sorted By : Signal  
Multiplier: : 1.0000  
Dilution: : 1.0000  
Use Multiplier & Dilution Factor with ISTDs

Signal 1: FID1 B, Back Signal

| Peak # | RetTime [min] | Type | Width [min] | Area [pA*s] | Height [pA] | Area %   |
|--------|---------------|------|-------------|-------------|-------------|----------|
| 1      | 25.993        | BV   | 0.1953      | 1181.58130  | 95.68957    | 49.75679 |
| 2      | 26.347        | VB   | 0.1935      | 1193.13232  | 97.79988    | 50.24321 |

Totals : 2374.71362 193.48945

=====  
\*\*\* End of Report \*\*\*  
=====

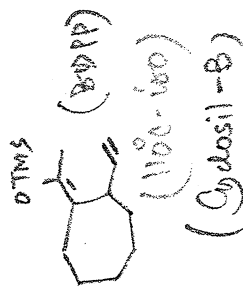

=====  
Acq. Operator : BISWAS  
Acq. Instrument : Babu  
Injection Date : 2/14/2014 2:07:33 AM  
Seq. Line : 1  
Location : Vial 201  
Inj : 1  
Inj Volume : 1 µl

Different Inj Volume from Sequence ! Actual Inj Volume : 4 µl  
Acq. Method : C:\CHEM32\1\DATA\SB\SB-1-CHIRAL 2014-02-14 02-06-24\110\_C-ISO\_CHIRAL.M  
Last changed : 2/14/2014 2:06:23 AM by BISWAS  
Analysis Method : C:\CHEM32\1\METHODS\35\_CYCLODEX-B.M  
Last changed : 2/25/2014 12:42:11 AM by Kendra Dewese  
(modified after loading)

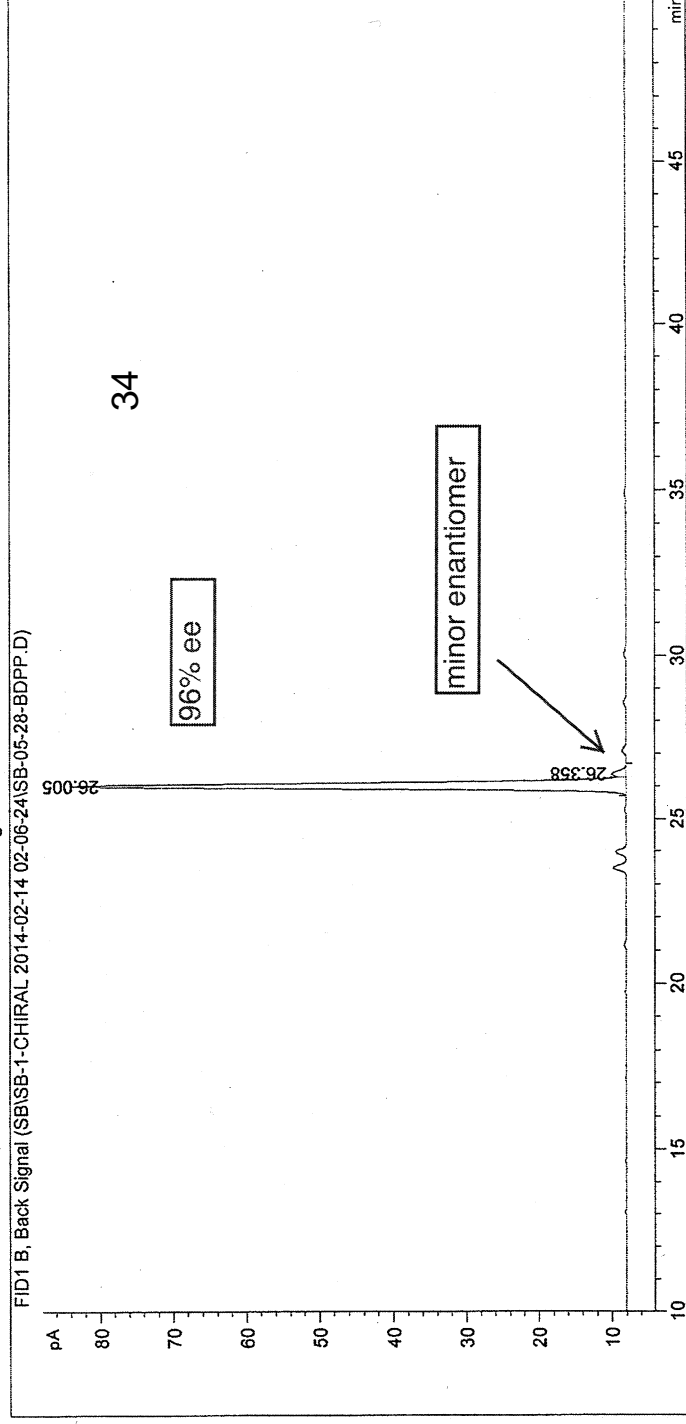

=====  
Area Percent Report  
=====

Sorted By : Signal  
Multiplier: : 1.0000  
Dilution: : 1.0000  
Use Multiplier & Dilution Factor with ISTDs

Signal 1: FID1 B, Back Signal

| Peak # | RetTime [min] | Type | Width [min] | Area [pA*s] | Height [pA] | Area %   |
|--------|---------------|------|-------------|-------------|-------------|----------|
| 1      | 26.005        | BV   | 0.1928      | 916.15771   | 75.49691    | 97.75248 |
| 2      | 26.358        | VB   | 0.1722      | 21.06422    | 1.92939     | 2.24752  |

Totals : 937.22193 77.42630

Sample Name: SB-07-234-DPPP-90C.D

BISWAS

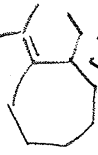

(DPPP)

(9°C-ISO)

(Gulosi-B)

35

=====  
Acq. Operator : BISWAS  
Acq. Instrument : Babu  
Injection Date : 8/7/2015 12:25:32 PM  
Seq. Line : 1  
Location : Vial 201  
Inj : 1  
Inj Volume : 1 µl

Different Inj Volume from Sequence !  
Acq. Method : C:\CHEM32\1\DATA\SB\SB-1-CHIRAL 2015-08-07 12-24-22\90\_C-ISO\_CHIRAL.M  
Last changed : 8/7/2015 2:26:45 PM by BISWAS  
(modified after loading)

Analysis Method : C:\CHEM32\1\METHODS\STANDBY.M  
Last changed : 8/7/2015 3:09:11 PM by BISWAS  
(modified after loading)

Method Info : Checkout 7820A at OSU; front channel

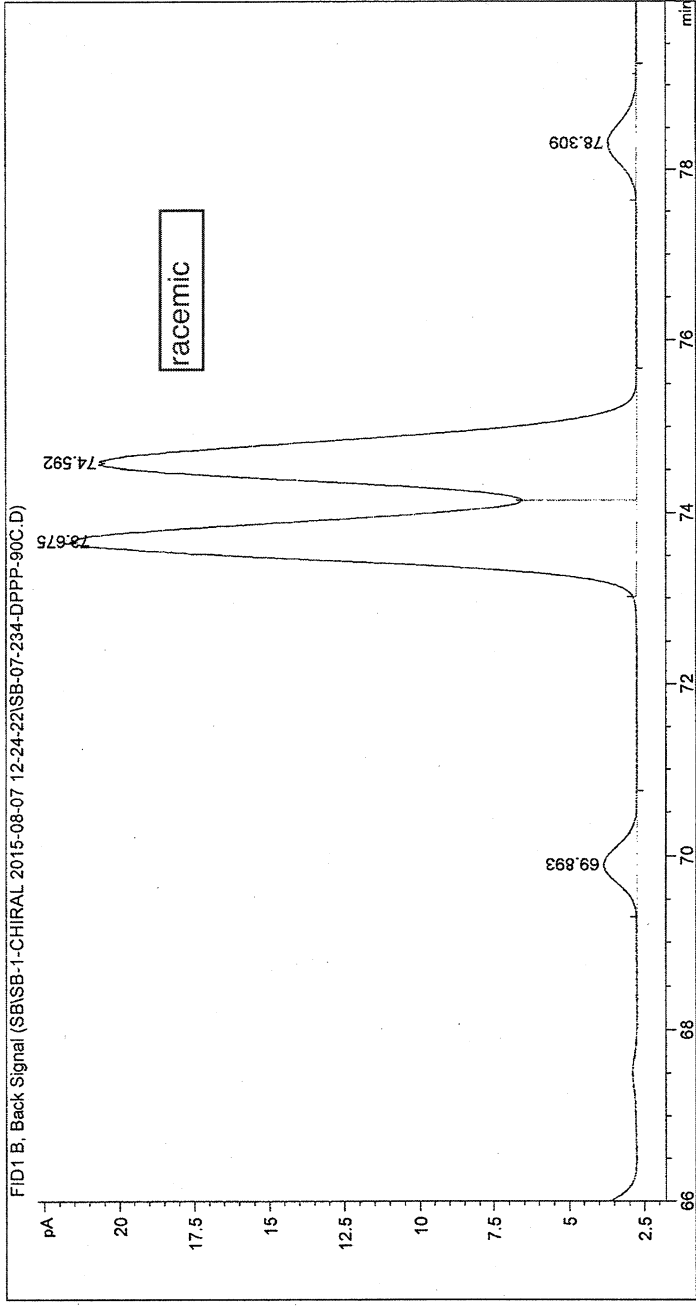

=====  
Area Percent Report  
=====

Sorted By : Signal  
Multiplier : 1.0000  
Dilution : 1.0000  
Use Multiplier & Dilution Factor with ISTDs

Signal 1: FID1 B, Back Signal

| Peak # | RetTime [min] | Type | Width [min] | Area [pA*s] | Height [pA] | Area %   |
|--------|---------------|------|-------------|-------------|-------------|----------|
| 1      | 23.690        | BB   | 0.1682      | 3.60211     | 3.40510e-1  | 0.28258  |
| 2      | 69.893        | BB   | 0.4947      | 34.46913    | 1.09678     | 2.70402  |
| 3      | 73.675        | BV   | 0.5011      | 599.07330   | 18.73468    | 46.99584 |
| 4      | 74.592        | VB   | 0.5235      | 603.44257   | 17.80017    | 47.33860 |

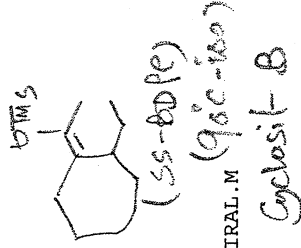

35

=====  
Acq. Operator : BISWAS  
Acq. Instrument : Babu  
Injection Date : 8/7/2015 2:39:20 PM  
Seq. Line : 1  
Location : Vial 201  
Inj : 1  
Inj Volume : 1 µl  
Different Inj Volume from Sequence !  
Acq. Method : C:\CHEM32\1\DATA\SB\SB-1-CHIRAL 2015-08-07 14-37-19\90\_C-ISO\_CHIRAL.M  
Last changed : 8/7/2015 4:56:27 PM by BISWAS  
(modified after loading)  
Analysis Method : C:\CHEM32\1\METHODS\STANDBY.M  
Last changed : 8/7/2015 4:57:31 PM by BISWAS  
(modified after loading)  
Method Info : Checkout 7820A at OSU; front channel  
=====

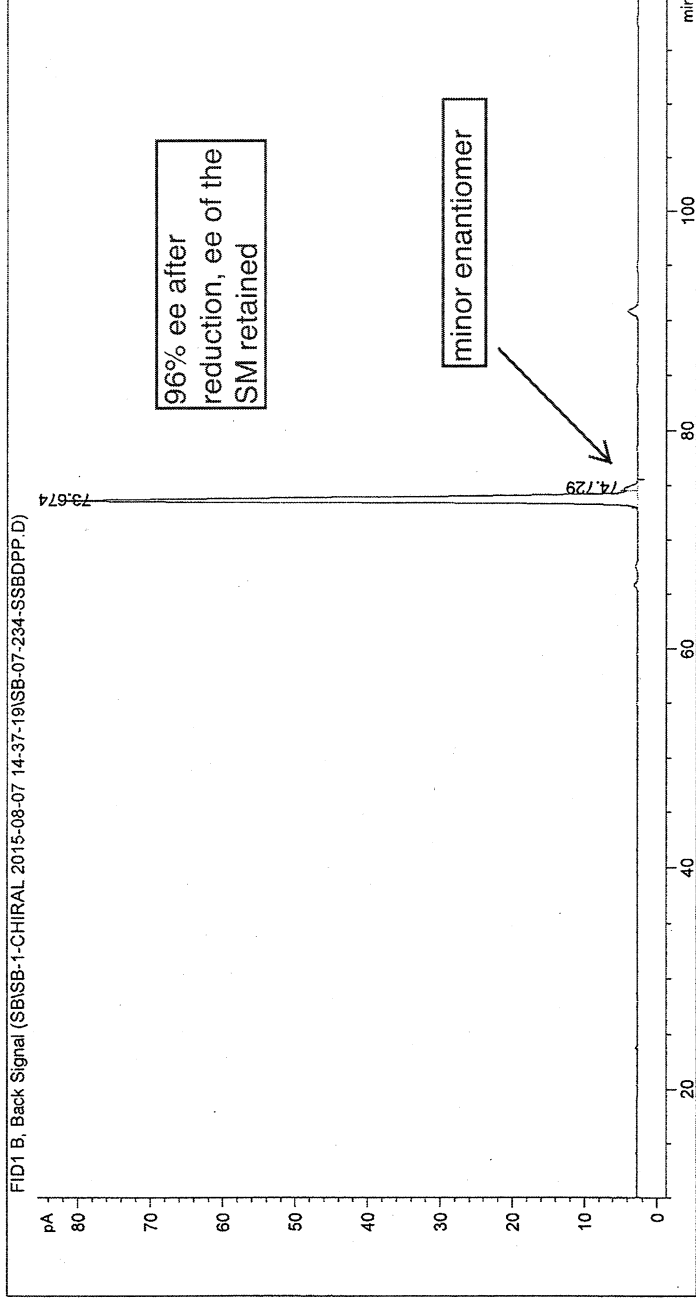

=====  
Area Percent Report  
=====

Sorted By : Signal  
Multiplier : 1.0000  
Dilution : 1.0000  
Use Multiplier & Dilution Factor with ISTDs

Signal 1: FID1 B, Back Signal

| Peak # | RetTime [min] | Type | Width [min] | Area [pA*s] | Height [pA] | Area %   |
|--------|---------------|------|-------------|-------------|-------------|----------|
| 1      | 73.674        | BV   | 0.5138      | 2592.39551  | 78.39325    | 98.01167 |
| 2      | 74.729        | VB   | 0.4446      | 52.59119    | 1.82713     | 1.98833  |

Totals : 2644.98670 80.22037

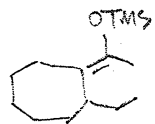

35

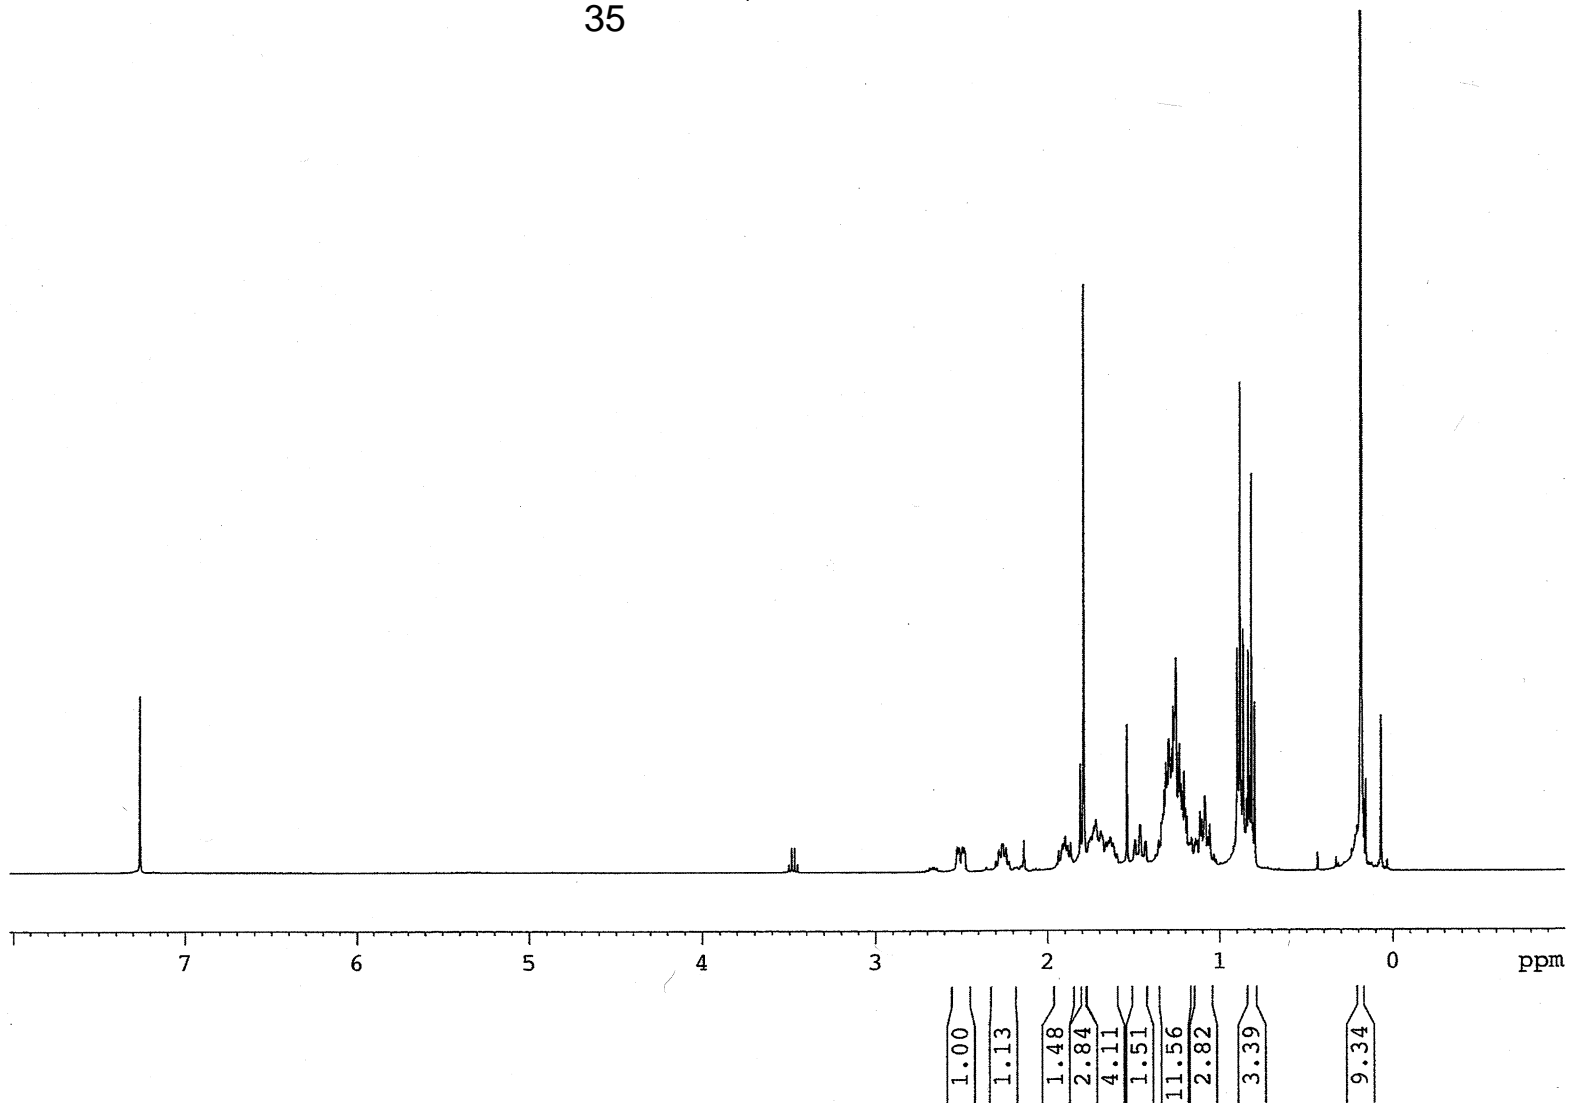

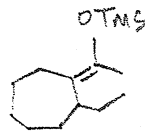

35

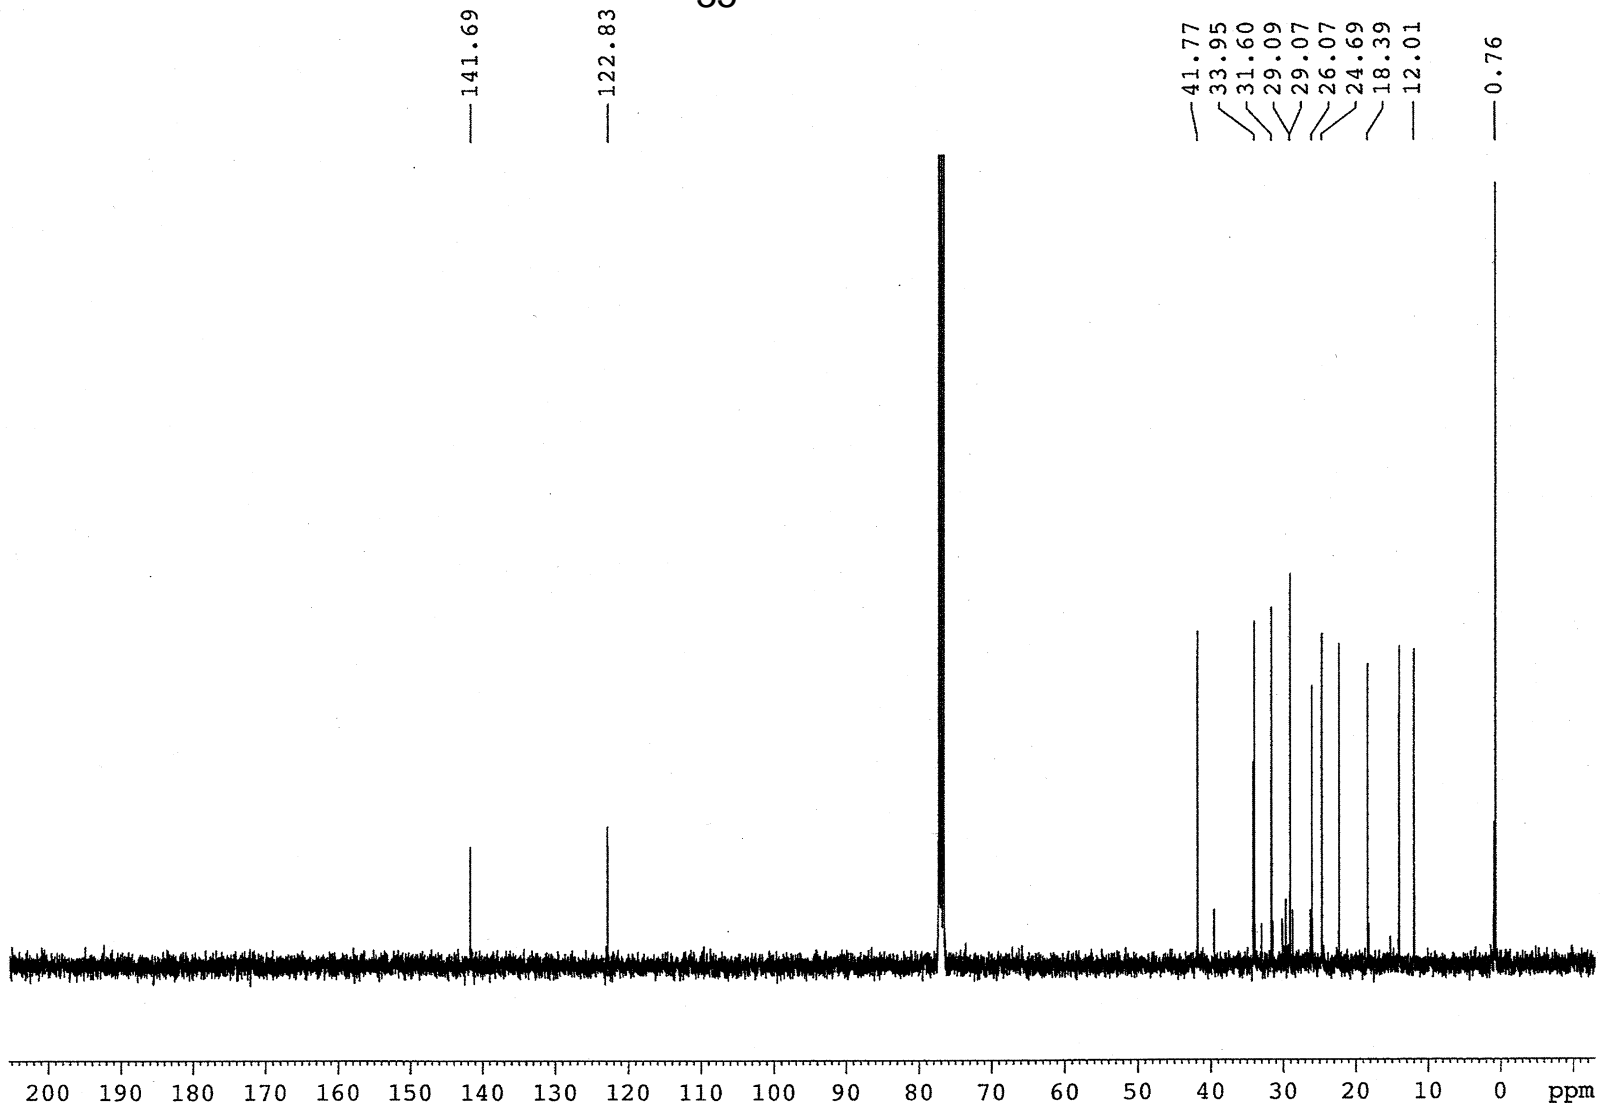

BR-09-32

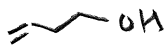

40°C / Isohexane

1.817

SCHEME 3: Reduction of 1-butyne-4-ol (crude product)

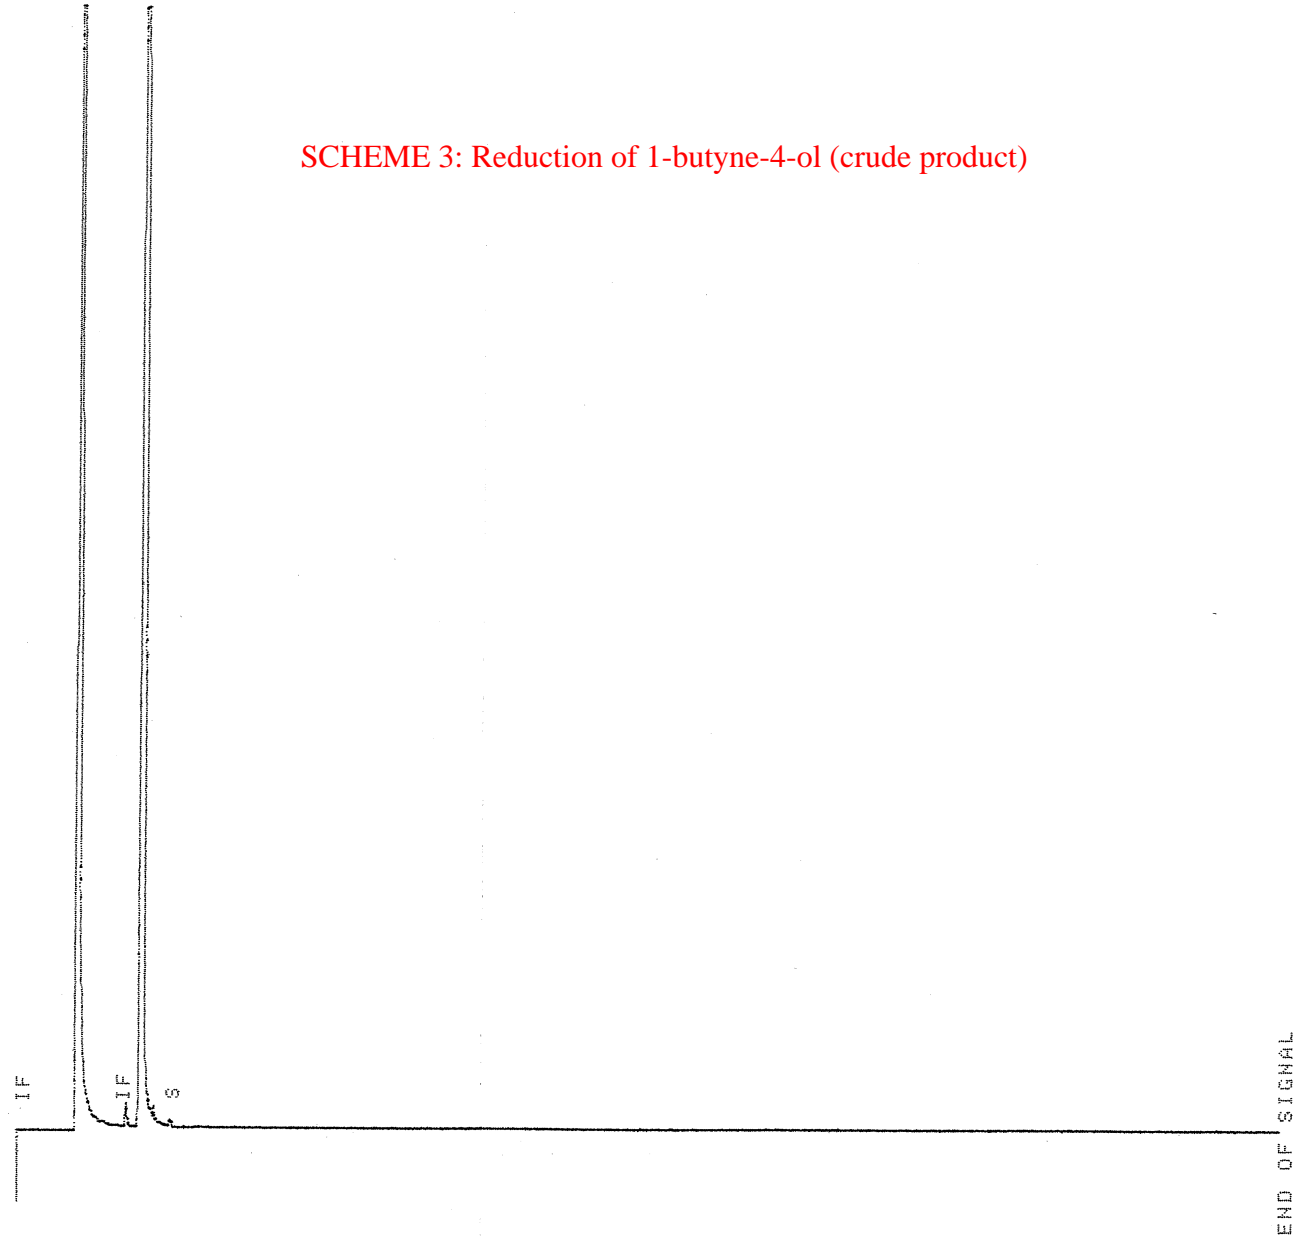

Closing signal file M:SIGNAL .BNA

RUN# 2076 JUL 10, 1901:00:05:56

SIGNAL FILE: M:SIGNAL.BNA

| AREA%     | RT    | AREA     | TYPE | WIDTH | AREA%     |
|-----------|-------|----------|------|-------|-----------|
| 100.00000 | 1.817 | 30931072 | SPB  | .066  | 100.00000 |

TOTAL AREA=3.0931E+07  
MUL FACTOR=1.0000E+00
